# Supplementary material for: BLINK: a package for the next level of genome-wide association studies with both individuals and markers in the millions
Source: PubMed Central journal article supplement (PMC6365300; doi:10.1093/gigascience/giy154), 2018-12-11

## Human Leukaemia cells (HL-60) proteomic and biological signatures underpinning cryo-damage are differentially modulated by novel cryo-additives.

--Manuscript Draft--

|                                                      |                                                                                                                                                                                                                                                                                                                                                                                                                                                                                                                                                                                                                                                                                                                                                                                                                                                                                                                                                                                                                                                                                                                                                                                                                                                                                                                                                                                                                                                                                                                                                                                                                                                                                                                                                                                                                                                                                                                                                                                                                                                                                                                                                                                                                                                                               |                            |
|------------------------------------------------------|-------------------------------------------------------------------------------------------------------------------------------------------------------------------------------------------------------------------------------------------------------------------------------------------------------------------------------------------------------------------------------------------------------------------------------------------------------------------------------------------------------------------------------------------------------------------------------------------------------------------------------------------------------------------------------------------------------------------------------------------------------------------------------------------------------------------------------------------------------------------------------------------------------------------------------------------------------------------------------------------------------------------------------------------------------------------------------------------------------------------------------------------------------------------------------------------------------------------------------------------------------------------------------------------------------------------------------------------------------------------------------------------------------------------------------------------------------------------------------------------------------------------------------------------------------------------------------------------------------------------------------------------------------------------------------------------------------------------------------------------------------------------------------------------------------------------------------------------------------------------------------------------------------------------------------------------------------------------------------------------------------------------------------------------------------------------------------------------------------------------------------------------------------------------------------------------------------------------------------------------------------------------------------|----------------------------|
| <b>Manuscript Number:</b>                            | GIGA-D-18-00064R1                                                                                                                                                                                                                                                                                                                                                                                                                                                                                                                                                                                                                                                                                                                                                                                                                                                                                                                                                                                                                                                                                                                                                                                                                                                                                                                                                                                                                                                                                                                                                                                                                                                                                                                                                                                                                                                                                                                                                                                                                                                                                                                                                                                                                                                             |                            |
| <b>Full Title:</b>                                   | Human Leukaemia cells (HL-60) proteomic and biological signatures underpinning cryo-damage are differentially modulated by novel cryo-additives.                                                                                                                                                                                                                                                                                                                                                                                                                                                                                                                                                                                                                                                                                                                                                                                                                                                                                                                                                                                                                                                                                                                                                                                                                                                                                                                                                                                                                                                                                                                                                                                                                                                                                                                                                                                                                                                                                                                                                                                                                                                                                                                              |                            |
| <b>Article Type:</b>                                 | Research                                                                                                                                                                                                                                                                                                                                                                                                                                                                                                                                                                                                                                                                                                                                                                                                                                                                                                                                                                                                                                                                                                                                                                                                                                                                                                                                                                                                                                                                                                                                                                                                                                                                                                                                                                                                                                                                                                                                                                                                                                                                                                                                                                                                                                                                      |                            |
| <b>Funding Information:</b>                          | King Abdulaziz City for Science and Technology                                                                                                                                                                                                                                                                                                                                                                                                                                                                                                                                                                                                                                                                                                                                                                                                                                                                                                                                                                                                                                                                                                                                                                                                                                                                                                                                                                                                                                                                                                                                                                                                                                                                                                                                                                                                                                                                                                                                                                                                                                                                                                                                                                                                                                | Dr Nigel Slater            |
|                                                      | Fundação de Amparo à Pesquisa do Estado de São Paulo (2014/14881-1)                                                                                                                                                                                                                                                                                                                                                                                                                                                                                                                                                                                                                                                                                                                                                                                                                                                                                                                                                                                                                                                                                                                                                                                                                                                                                                                                                                                                                                                                                                                                                                                                                                                                                                                                                                                                                                                                                                                                                                                                                                                                                                                                                                                                           | Dr Daniel Martins-de-Souza |
|                                                      | Brazilian National Council for Scientific and Technological Development (460289/2014-4)                                                                                                                                                                                                                                                                                                                                                                                                                                                                                                                                                                                                                                                                                                                                                                                                                                                                                                                                                                                                                                                                                                                                                                                                                                                                                                                                                                                                                                                                                                                                                                                                                                                                                                                                                                                                                                                                                                                                                                                                                                                                                                                                                                                       | Dr Daniel Martins-de-Souza |
| <b>Abstract:</b>                                     | <p><b>Abstract</b></p> <p><b>Background:</b> Cryopreservation is a routinely used methodology for prolonged storage of viable cells. The use of cryo-protective agents (CPAs) such as dimethylsulfoxide (DMSO), glycerol or trehalose is paramount to reduce cellular cryo-injury but their effectiveness is still limited. The current study focuses on establishing and modulating the proteomic and the corresponding biological profiles associated with the cryo-injury of human leukaemia (HL-60) cells cryopreserved in DMSO alone or DMSO +/- novel CPAs [e.g. nigerose (Nig) or salidroside (Sal)].</p> <p><b>Findings:</b> To reduce cryo-damage, HL-60 cells were cultured prior and post cryopreservation in RPMI-1640 media +/- Nig or Sal. Shotgun proteomic analysis showed significant alterations in the levels of proteins in cells cryopreserved in Nig or Sal compared to DMSO. Nig mostly affected cellular metabolism and energy pathways, whereas Sal increased the levels of proteins associated with DNA repair/duplication, RNA transcription and cell proliferation. Validation testing showed that the proteome profile associated with Sal was correlated with a 2.8 fold increase in cell proliferative rate. At the functional level, both Nig and Sal increased glutathione reductase (0.0012±6.19E-05 and 0.0016±3.04E-05 mU/mL, respectively) compared to DMSO controls (0.0003±3.7E-05 mU/mL) and reduced cytotoxicity by decreasing lactate dehydrogenase activities (from -2.5 to -4.75 fold) and lipid oxidation (-1.6 fold). In contrast, only Nig attenuated protein carbonylation or oxidation.</p> <p><b>Conclusions:</b> We have identified key molecules and corresponding functional pathways underpinning the effect of cryopreservation (+/- CPAs) of HL-60 cells. We also validated the proteomic findings by identifying the corresponding biological profiles associated with promoting an anti-oxidative environment post cryopreservation. Nig or Sal in comparison to DMSO showed differential or additive effects in regards to reducing cryo-injury and enhancing cell survival/proliferation post thaw. These results can provide useful insight to cryo-damage and the design of enhanced cryomedia formulation.</p> |                            |
| <b>Corresponding Author:</b>                         | Hassan Rahmoune, Ph. D.<br>University of Cambridge<br>UNITED KINGDOM                                                                                                                                                                                                                                                                                                                                                                                                                                                                                                                                                                                                                                                                                                                                                                                                                                                                                                                                                                                                                                                                                                                                                                                                                                                                                                                                                                                                                                                                                                                                                                                                                                                                                                                                                                                                                                                                                                                                                                                                                                                                                                                                                                                                          |                            |
| <b>Corresponding Author Secondary Information:</b>   |                                                                                                                                                                                                                                                                                                                                                                                                                                                                                                                                                                                                                                                                                                                                                                                                                                                                                                                                                                                                                                                                                                                                                                                                                                                                                                                                                                                                                                                                                                                                                                                                                                                                                                                                                                                                                                                                                                                                                                                                                                                                                                                                                                                                                                                                               |                            |
| <b>Corresponding Author's Institution:</b>           | University of Cambridge                                                                                                                                                                                                                                                                                                                                                                                                                                                                                                                                                                                                                                                                                                                                                                                                                                                                                                                                                                                                                                                                                                                                                                                                                                                                                                                                                                                                                                                                                                                                                                                                                                                                                                                                                                                                                                                                                                                                                                                                                                                                                                                                                                                                                                                       |                            |
| <b>Corresponding Author's Secondary Institution:</b> |                                                                                                                                                                                                                                                                                                                                                                                                                                                                                                                                                                                                                                                                                                                                                                                                                                                                                                                                                                                                                                                                                                                                                                                                                                                                                                                                                                                                                                                                                                                                                                                                                                                                                                                                                                                                                                                                                                                                                                                                                                                                                                                                                                                                                                                                               |                            |
| <b>First Author:</b>                                 | Hassan Rahmoune, Ph. D.                                                                                                                                                                                                                                                                                                                                                                                                                                                                                                                                                                                                                                                                                                                                                                                                                                                                                                                                                                                                                                                                                                                                                                                                                                                                                                                                                                                                                                                                                                                                                                                                                                                                                                                                                                                                                                                                                                                                                                                                                                                                                                                                                                                                                                                       |                            |
| <b>First Author Secondary Information:</b>           |                                                                                                                                                                                                                                                                                                                                                                                                                                                                                                                                                                                                                                                                                                                                                                                                                                                                                                                                                                                                                                                                                                                                                                                                                                                                                                                                                                                                                                                                                                                                                                                                                                                                                                                                                                                                                                                                                                                                                                                                                                                                                                                                                                                                                                                                               |                            |
| <b>Order of Authors:</b>                             | Hassan Rahmoune, Ph. D.                                                                                                                                                                                                                                                                                                                                                                                                                                                                                                                                                                                                                                                                                                                                                                                                                                                                                                                                                                                                                                                                                                                                                                                                                                                                                                                                                                                                                                                                                                                                                                                                                                                                                                                                                                                                                                                                                                                                                                                                                                                                                                                                                                                                                                                       |                            |

|                                                |                                                                                                                                                                                                                                                                                                                                                                                                                                                                                                                                                                                                                                                                                                                                                                                                                                                                                                                                                                                                                                                                                                                                                                                                                                                                                                                                                                                                                                                                                                                                                                                                                                                                                                                                                                                                                                                                                                                                                                                                                                                                                                                                                                                                                                                                                                                                                                                                                                                                                                                                                                                                                                                                                                                                                                                                                                                                                                                                                                                                                                |
|------------------------------------------------|--------------------------------------------------------------------------------------------------------------------------------------------------------------------------------------------------------------------------------------------------------------------------------------------------------------------------------------------------------------------------------------------------------------------------------------------------------------------------------------------------------------------------------------------------------------------------------------------------------------------------------------------------------------------------------------------------------------------------------------------------------------------------------------------------------------------------------------------------------------------------------------------------------------------------------------------------------------------------------------------------------------------------------------------------------------------------------------------------------------------------------------------------------------------------------------------------------------------------------------------------------------------------------------------------------------------------------------------------------------------------------------------------------------------------------------------------------------------------------------------------------------------------------------------------------------------------------------------------------------------------------------------------------------------------------------------------------------------------------------------------------------------------------------------------------------------------------------------------------------------------------------------------------------------------------------------------------------------------------------------------------------------------------------------------------------------------------------------------------------------------------------------------------------------------------------------------------------------------------------------------------------------------------------------------------------------------------------------------------------------------------------------------------------------------------------------------------------------------------------------------------------------------------------------------------------------------------------------------------------------------------------------------------------------------------------------------------------------------------------------------------------------------------------------------------------------------------------------------------------------------------------------------------------------------------------------------------------------------------------------------------------------------------|
|                                                | Noha Al-Otaibi                                                                                                                                                                                                                                                                                                                                                                                                                                                                                                                                                                                                                                                                                                                                                                                                                                                                                                                                                                                                                                                                                                                                                                                                                                                                                                                                                                                                                                                                                                                                                                                                                                                                                                                                                                                                                                                                                                                                                                                                                                                                                                                                                                                                                                                                                                                                                                                                                                                                                                                                                                                                                                                                                                                                                                                                                                                                                                                                                                                                                 |
|                                                | Juliana Cassoli                                                                                                                                                                                                                                                                                                                                                                                                                                                                                                                                                                                                                                                                                                                                                                                                                                                                                                                                                                                                                                                                                                                                                                                                                                                                                                                                                                                                                                                                                                                                                                                                                                                                                                                                                                                                                                                                                                                                                                                                                                                                                                                                                                                                                                                                                                                                                                                                                                                                                                                                                                                                                                                                                                                                                                                                                                                                                                                                                                                                                |
|                                                | Daniel Martins-de-Souza                                                                                                                                                                                                                                                                                                                                                                                                                                                                                                                                                                                                                                                                                                                                                                                                                                                                                                                                                                                                                                                                                                                                                                                                                                                                                                                                                                                                                                                                                                                                                                                                                                                                                                                                                                                                                                                                                                                                                                                                                                                                                                                                                                                                                                                                                                                                                                                                                                                                                                                                                                                                                                                                                                                                                                                                                                                                                                                                                                                                        |
|                                                | Nigel Slater                                                                                                                                                                                                                                                                                                                                                                                                                                                                                                                                                                                                                                                                                                                                                                                                                                                                                                                                                                                                                                                                                                                                                                                                                                                                                                                                                                                                                                                                                                                                                                                                                                                                                                                                                                                                                                                                                                                                                                                                                                                                                                                                                                                                                                                                                                                                                                                                                                                                                                                                                                                                                                                                                                                                                                                                                                                                                                                                                                                                                   |
| <b>Order of Authors Secondary Information:</b> |                                                                                                                                                                                                                                                                                                                                                                                                                                                                                                                                                                                                                                                                                                                                                                                                                                                                                                                                                                                                                                                                                                                                                                                                                                                                                                                                                                                                                                                                                                                                                                                                                                                                                                                                                                                                                                                                                                                                                                                                                                                                                                                                                                                                                                                                                                                                                                                                                                                                                                                                                                                                                                                                                                                                                                                                                                                                                                                                                                                                                                |
| <b>Response to Reviewers:</b>                  | <p>Dear Dr. Scott Edmunds,</p> <p>Thank you for facilitating the review of our paper (Ref. GigaScience - GIGA-D-18-00064). You will find below that we agree with all of the reviewers' points, as indicated stepwise below. We have subsequently made the corresponding changes in the revised manuscript- See the 'Revised Manuscript with Track Changes' file.<br/>We have also carried out a careful proof reading of our manuscript and amend it prior submitting the present revised version.</p> <p>Kind regards,<br/>Dr. Hassan Rahmoune</p> <p>Comments to the Author Reviewer #1<br/>Author response: we thank the referee for his/her comments and this has been altered accordingly as stated below:</p> <p>So the authors should checked the following issues:</p> <p>1)even if authors well summarized the changes that up to date have modified the cryopreservation technique, in the background section (line 70 pg 3), more detailed literature data on stem cell studies should be reported, considering their possible use in regenerative medicine;</p> <p>Author response: The requested information has been included from line 70 up to line 78 and three references were also added. See the uploaded version entitled 'Revised Manuscript with Track Changes' file</p> <p>2)at line 265 pg 10, for the sentence For example,.....it's necessary delete the article OF; this should be checked;<br/>Author response: we agree and the requested information has been included in line 314 in the uploaded version entitled 'Revised Manuscript with Track Changes' file</p> <p>3) how many replicates for proteomic experiment were used ? The authors should specify it.<br/>Author response: we have now added further information on this issue in the text lines 137, 706 and 713-714.<br/>The requested information has also been included in Table 1, Tables S1, S2 and S3 legends. See the uploaded version entitled 'Revised Manuscript with Track Changes' file</p> <p>4)Trypan blue assays for cell viability were carried out on HL-60 cell at 1 h, 24 h and 48 h post thaw. No description were reported in the results section, though in the Figure S1 for each novel cryo-agents cell viability rate are showed;<br/>Author response: we agree and we have now added further information on this issue in the text on lines 243-245.<br/>Cell viability was not reported here as HL-60 cells were washed centrifuged at 100 x g for 5 min and washed immediately three times with RPMI media (the changes in cell viability post thaw was negligible (&lt;2%).</p> <p>5)also no cytotoxicity tests were performed; these results could strongly validate the proteome finding related to HL-60 cryopreservation in DMSO +/- Nig or Sal. The authors should consider this suggestion.<br/>Author response: we thank the referee for his/her comments and this has been altered accordingly.<br/>The lactate dehydrogenase assay was used as a measurements of cellular cytotoxicity</p> |

and the requested information has been included in line 366-368 and the corresponding reference has also been added.

Reviewer #2:

1. I also miss tables that summarize the quantitative data, which is a must-have for quantitative proteomics manuscripts.

Author response: we thank the referee for his/her comments and this has been altered accordingly. The quantitative proteomics data analysis representing Arm 1, 2 & 3 were added as supplementary Tables S1, S2 and S3, respectively.

2. Also, the authors out-of-a-sudden study carbonylation but do not give a rationale for this. To me it is unclear why they decided to look for this out of so many modifications.

Author response: this has been clarified and the requested information has been included on lines 39, 262, 272-274, 276, 278 and 732 (Figure 7 legend).

3. It is also unclear what the authors mean with "significantly quantified proteins", first I thought they meant significantly differential, however, the different numbers between the figures and table 1 make me wonder if I got that right. Thus, it is unclear what the total numbers of identified, quantified and significantly differentially expressed proteins are.

Author response: we agree and the requested information has been amended and included in lines 141-143 and 161-167.

The quantitative proteomics data representing Arm 1, 2 & 3 were added as a supplementary table S1, S2 and S3 respectively. The biologically relevant proteome data summarised in table 1 now can be found in the supplementary tables S1, S2 and S3.

4. The discussion needs to be expanded, for instance addressing the question about the dynamic range of this study and the regulated proteome, if possible in the light of other studies on that cell line or at least compared to other cell lines.

5. Author response: we agree and the requested information has been amended and included in lines 305-308.

Some other issues:

1) The methods part is incomplete and important steps are not clear. The search algorithm is not clearly mentioned, it is also unclear what "default parameters for ion accounting" means. The authors should stick to standard guidelines for reporting proteomic MS data. The whole part is a bit hard to follow, I wonder why the authors not report things step-by-step, which is first Progenesis alignment and peak detection, then export of peaklists and then a clearly described search strategy. Also it is unclear what the "ion-matching requirements" mean, for instance 1 fragment per peptide and 3 fragments per protein. Why was O-GlcNac searched as PTM, this is not a common PTM one would include in the database search. On what level was the FDR, protein, peptide, PSM, all of them? Were all proteins that had an ANOVA below 0.05 considered as regulated, without an additional fold-change cut-off? I would expect high shares of false positives here. The authors should use a corrected p-value to compensate for that. Tables summarizing the quantitative data are missing as supplements.

Author response: we thank the referee for his/her comments and the missing tables summarizing the quantitative data representing Arm 1, 2 & 3 were added as Supplementary Table S1, S2 & S3 respectively.

The changes were also made accordingly in the text of the manuscript – See revised section "Proteomic analysis" – Page 6 and 7.

We have also introduced the necessary changes in:

- "Sample preparation" section and introduced/updated the "data processing and database searches" – See page 16-18 in the revised version.
- The data processing and database searches sections were amended accordingly –

|                                                                                                                                                                                                                                                                                                                                                                                                                                                                                                      |                                                                                                                                                                                                                                                                                                                                                                                                                                                                                                                                                                                                                                                                                                                                                                                                                                                                                                                                                                                                   |
|------------------------------------------------------------------------------------------------------------------------------------------------------------------------------------------------------------------------------------------------------------------------------------------------------------------------------------------------------------------------------------------------------------------------------------------------------------------------------------------------------|---------------------------------------------------------------------------------------------------------------------------------------------------------------------------------------------------------------------------------------------------------------------------------------------------------------------------------------------------------------------------------------------------------------------------------------------------------------------------------------------------------------------------------------------------------------------------------------------------------------------------------------------------------------------------------------------------------------------------------------------------------------------------------------------------------------------------------------------------------------------------------------------------------------------------------------------------------------------------------------------------|
|                                                                                                                                                                                                                                                                                                                                                                                                                                                                                                      | <p>See revised version of the manuscript: lines 448-469 (Page 17-18).</p> <p>2)It is confusing to have the chapter on "data description" that contains incomplete information about database searches and quantification in the beginning of the manuscript and the actual part on M&amp;M including the MS analysis in the end. The M&amp;M part is not always clear. For instance what is "cooled acetone"?</p> <p>Author response: we thank the referee for his/her comments and the "data description" section has been altered accordingly – See Line 449-469 (Page 17-18) in the revised version</p> <p>3)Table 1: Fold changes are log2 I presume from looking at negative fold-changes, but it is not mentioned in the table. Or is -1.2 a 1.2-fold downregulation, which normally then would be 0.83?</p> <p>Author response: we thank and agree with the referee for his/her comments and the table 1 have been amended in the revised version as the fold change is indeed a log2.</p> |
| <b>Additional Information:</b>                                                                                                                                                                                                                                                                                                                                                                                                                                                                       |                                                                                                                                                                                                                                                                                                                                                                                                                                                                                                                                                                                                                                                                                                                                                                                                                                                                                                                                                                                                   |
| <b>Question</b>                                                                                                                                                                                                                                                                                                                                                                                                                                                                                      | <b>Response</b>                                                                                                                                                                                                                                                                                                                                                                                                                                                                                                                                                                                                                                                                                                                                                                                                                                                                                                                                                                                   |
| Are you submitting this manuscript to a special series or article collection?                                                                                                                                                                                                                                                                                                                                                                                                                        | No                                                                                                                                                                                                                                                                                                                                                                                                                                                                                                                                                                                                                                                                                                                                                                                                                                                                                                                                                                                                |
| <p><b>Experimental design and statistics</b></p> <p>Full details of the experimental design and statistical methods used should be given in the Methods section, as detailed in our <a href="#">Minimum Standards Reporting Checklist</a>. Information essential to interpreting the data presented should be made available in the figure legends.</p> <p>Have you included all the information requested in your manuscript?</p>                                                                   | Yes                                                                                                                                                                                                                                                                                                                                                                                                                                                                                                                                                                                                                                                                                                                                                                                                                                                                                                                                                                                               |
| <p><b>Resources</b></p> <p>A description of all resources used, including antibodies, cell lines, animals and software tools, with enough information to allow them to be uniquely identified, should be included in the Methods section. Authors are strongly encouraged to cite <a href="#">Research Resource Identifiers</a> (RRIDs) for antibodies, model organisms and tools, where possible.</p> <p>Have you included the information requested as detailed in our <a href="#">Minimum</a></p> | Yes                                                                                                                                                                                                                                                                                                                                                                                                                                                                                                                                                                                                                                                                                                                                                                                                                                                                                                                                                                                               |

|                                                                                                                                                                                                                                                                                                                                                                                                                                                                                                                                                         |     |
|---------------------------------------------------------------------------------------------------------------------------------------------------------------------------------------------------------------------------------------------------------------------------------------------------------------------------------------------------------------------------------------------------------------------------------------------------------------------------------------------------------------------------------------------------------|-----|
| <a href="#">Standards Reporting Checklist?</a>                                                                                                                                                                                                                                                                                                                                                                                                                                                                                                          |     |
| <p><b>Availability of data and materials</b></p> <p>All datasets and code on which the conclusions of the paper rely must be either included in your submission or deposited in <a href="#">publicly available repositories</a> (where available and ethically appropriate), referencing such data using a unique identifier in the references and in the “Availability of Data and Materials” section of your manuscript.</p> <p>Have you have met the above requirement as detailed in our <a href="#">Minimum Standards Reporting Checklist?</a></p> | Yes |

[Click here to view linked References](#)

1

1 **Human Leukaemia cells (HL-60) proteomic and biological signatures underpinning**

2 **cryo-damage are differentially modulated by novel cryo-additives**

3 Noha A. S. Al-Otaibi<sup>1,2</sup>, Juliana S. Cassoli<sup>3</sup>, Daniel Martins-de-Souza<sup>3</sup>, Nigel K. H. Slater<sup>1</sup>, Hassan

4 Rahmoune<sup>1 #</sup>

5

6 (1) Department of Chemical Engineering & Biotechnology, University of Cambridge, Philippa

7 Fawcett Drive. Cambridge CB3 0AS, United Kingdom.

8 (2) King Abdulaziz City for Science and Technology Kingdom of Saudi Arabia P.O Box 6086,

9 Riyadh 11442, Saudi Arabia.

10 (3) Laboratory of Neuroproteomics, Department of Biochemistry and Tissue Biology Institute of

11 Biology, University of Campinas (UNICAMP), Campinas, SP, Brazil.

12

13 # Address correspondence to Hassan Rahmoune, Ph. D., (1). Email: [hr228@cam.ac.uk](mailto:hr228@cam.ac.uk)

14

15 E-mail addresses (in the order of appearance): [naa37@cam.ac.uk](mailto:naa37@cam.ac.uk), [jscassoli@gmail.com](mailto:jscassoli@gmail.com),

16 [dmsouza@unicamp.br](mailto:dmsouza@unicamp.br), [nkhs2@cam.ac.uk](mailto:nkhs2@cam.ac.uk), [hr228@cam.ac.uk](mailto:hr228@cam.ac.uk)

17

18 ***Running Title:*** Modulating molecular profiles underpinning HL-60 cryo-damage

19

20

21

22

## 23 Abstract

1  
2  
3 24 **Background:** Cryopreservation is a routinely used methodology for prolonged storage of viable cells.  
4  
5 25 The use of cryo-protective agents (CPAs) such as dimethylsulfoxide (DMSO), glycerol or trehalose is  
6  
7 26 paramount to reduce cellular cryo-injury but their effectiveness is still limited. The current study  
8  
9 27 focuses on establishing and modulating the proteomic and the corresponding biological profiles  
10  
11 28 associated with the cryo-injury of human leukaemia (HL-60) cells cryopreserved in DMSO alone or  
12  
13 29 DMSO +/- novel CPAs [e.g. nigerose (Nig) or salidroside (Sal)].

14  
15  
16  
17 30 **Findings:** To reduce cryo-damage, HL-60 cells were cultured prior and post cryopreservation in  
18  
19 31 RPMI-1640 media +/- Nig or Sal. Shotgun proteomic analysis showed significant alterations in the  
20  
21 32 levels of proteins in cells cryopreserved in Nig or Sal compared to DMSO. Nig mostly affected  
22  
23 33 cellular metabolism and energy pathways, whereas Sal increased the levels of proteins associated with  
24  
25 34 DNA repair/duplication, RNA transcription and cell proliferation. Validation testing showed that the  
26  
27 35 proteome profile associated with Sal was correlated with a 2.8 fold increase in cell proliferative rate.  
28  
29 36 At the functional level, both Nig and Sal increased glutathione reductase ( $0.0012 \pm 6.19E-05$  and  
30  
31 37  $0.0016 \pm 3.04E-05$  mU/mL, respectively) compared to DMSO controls ( $0.0003 \pm 3.7E-05$  mU/mL) and  
32  
33 38 reduced cytotoxicity by decreasing lactate dehydrogenase activities (from -2.5 to -4.75 fold) and lipid  
34  
35 39 oxidation (-1.6 fold). In contrast, only Nig attenuated protein carbonylation or oxidation.

36  
37  
38  
39  
40 40 **Conclusions:** We have identified key molecules and corresponding functional pathways underpinning  
41  
42 41 the effect of cryopreservation (+/- CPAs) of HL-60 cells. We also validated the proteomic findings by  
43  
44 42 identifying the corresponding biological profiles associated with promoting an anti-oxidative  
45  
46 43 environment post cryopreservation. Nig or Sal in comparison to DMSO showed a differential or  
47  
48 44 additive effects in regards to reducing cryo-injury and enhancing cell survival/proliferation post thaw.  
49  
50 45 These results can provide useful insight to cryo-damage and the design of enhanced cryomedia  
51  
52 46 formulation.

53  
54  
55  
56 47  
57  
58  
59 48 **Keywords:** Cryopreservation, Oxidative stress, Dimethylsulfoxide, Nigerose, Salidroside.  
60  
61  
62  
63  
64  
65

## 49 Background

1  
2  
3 50 Cryopreservation of viable cells and tissues is a powerful approach to ensure cell longevity and integrity  
4  
5 51 and facilitate cell/tissue engineering therapy [1]. Cell-based therapy is a rapidly emerging industry and  
6  
7 52 is estimated to be worth around \$5 billion in the USA alone [2]. Despite well-established  
8  
9 53 cryopreservation protocols, cells remain subject to a high level of cryo-damage leading to compromised  
10  
11 54 cell function and necrosis [3]. The cellular damage is generally seen as lipid and protein oxidation,  
12  
13 55 which can severely affect cell stability [4] and ability to proliferate [5]. Thus, reducing the impact of  
14  
15 56 cryo-damage is paramount to enhance cell recovery rate post freeze/thaw cycles.  
16  
17

18 57  
19  
20 58 Despite their reported toxic properties, DMSO and glycerol are the most commonly used cryo-  
21  
22 59 protective agents (CPAs) to reduce cryo-injury and increase cell viability [5]. Other CPAs such as  
23  
24 60 trehalose have been used for their cryo-protective properties against intracellular ice crystal formation  
25  
26 61 [6]. However, the protective effect of these compounds is still limited [7] with low cell viability and  
27  
28 62 recovery rates post cryopreservation [8]. The use of CPAs can also lead to production of reactive oxygen  
29  
30 63 species, whereby cells are subjected to oxidative damage during freeze-thaw cycles [9]. Moreover, the  
31  
32 64 effectiveness of intracellular or auto anti-oxidative response to cryo-insult is limited as cell survival is  
33  
34 65 reduced [10]. Attempts to promote cellular anti-oxidative status have been reported before and these  
35  
36 66 showed an improved cell survival rate [11]. For example, the use of arabidopsis thaliana containing  
37  
38 67 high levels of ascorbic acid increased intracellular catalase activity leading to a higher cell survival rate  
39  
40 68 post thaw [11].  
41  
42  
43  
44  
45  
46

47  
48 70 The majority of studies on cryopreservation have focused on either fertility [12-14] or more recently  
49  
50 71 on stem cells [5]. The potential clinical use of Human Mesenchymal Stem Cells in regenerative  
51  
52 72 medicine and/or cell-based therapy has led to a sharp focus on enhancing the cryopreservation process  
53  
54 73 of these cells. Martín-Ibáñez et al have succinctly summarised the current use of CPAs as additive (e.  
55  
56 74 g. DMSO/ Glycerol +/- cryo-additive agents) to slightly improve the cryopreservation of human  
57  
58 75 Pluripotent stem cells [15]. More recently, Haritz Gurruchaga et al have demonstrated that the  
59  
60  
61  
62  
63  
64  
65



76 combination of CPAs such as DMSO/Sucrose has significantly improved the quality of Human  
77 Mesenchymal Stem Cells post cryopreservation [16]. Tissue cryopreservation of the umbilical cord  
78 has also been attempted which is crucial to the future success regenerative medicine [17]. Aalthough  
79 limited attempts have been carried out to improve cryopreservation of cell lines (e. g. Hepatocytes)  
80 [~~15~~18]. Moreover, the bulk of empirical studies attempting to decipher molecular profiles associated  
81 with cryo-injury have been conducted mainly on fertility-related specimens [~~16~~19, ~~17~~20], plant cells  
82 [~~18~~21] or stem cells [~~19~~22]. Likewise, attempts to modify cryo-proteomic profiles using CPAs or  
83 DMSO +/- antifreeze have been made mainly in the field of reproductive medicine [~~20~~23, ~~21~~24]. In  
84 contrast, only a limited number of molecular/functional studies have been conducted on nucleated-  
85 human cell lines to decipher and modulate biological pathways underpinning cryo-damage.

86 Here, we have used human leukemia (HL-60) cells as a nucleated cellular model to establish the  
87 biomolecular profiles associated with cryo-damage in the presence of DMSO alone or with the addition  
88 of salidroside (Sal) or the novel CPA nigerose (Nig) [4]. The addition of Sal with the tyrosol glucoside,  
89 as the active component of the herb Rhodiolarosea, was used previously to prevent high altitude  
90 sickness [~~22~~25]. Sal has also been found to act as antioxidant against hydrogen peroxide-induced  
91 apoptosis of human red blood cells [~~23~~26] and as a CPA for red blood cell cryopreservation [4].  
92 However, this is the first investigation to test the potential cryoprotective properties of Nig. Nig is an  
93 un-fermentable sugar obtained by partial hydrolysis of nigeran and is polyol extracted from  
94 fermentation of microorganisms such as black mold or dextrans [~~24~~27] as well as honey [~~25~~28]. A  
95 hypothesis driven approach is clearly needed here to elucidate and modify cell-specific molecular and  
96 biological pathways associated with cyo-injury. Here we have employed a shotgun proteomics approach  
97 to profile and modulate the molecular pathways underpinning human nucleated cell cryo-damage. The  
98 present study also offers the opportunity to enhance future cryomedia formulation, minimize losses of  
99 cell viability and maximize cell recovery post freeze-thaw cycle.

## 101 **Data Description**

102 ~~Human leukaemia (HL-60) cells were used nucleated cellular model to establish the biomolecular~~  
103 ~~profiles associated with cryo-damage in the presence of DMSO alone or with novel CPAs [e.g. nigerose~~  
104 ~~(Nig) or salidoside (Sal)]. The cells were culture in RPMI media with proper conditions (37°C under~~  
105 ~~5% CO<sub>2</sub>/95% air). The experimental design was done in three main arms. In Arm 1, the cells were~~  
106 ~~cultured in RPMI media, erio-preserved in freezing media (10% DMSO and 90% FBS) and recovered~~  
107 ~~in RPMI media. For Arm 2 and Arm 3, 300 µM Nig and 200 µM Sal was added respectively in all~~  
108 ~~media used in 24 h prior to cryopreservation, during cryopreservation and up to 48 h post thaw. Cells~~  
109 ~~from each Arm were collected (24 h prior freeze and 24h post thaw) and their proteins were extracted~~  
110 ~~for proteomic and analyses. For proteomic analysis sSamples were analysed using hi-resolution mass~~  
111 ~~spectrometry on a Synapt G2-Si HDMS mass spectrometer (Waters). Data processing, database~~  
112 ~~searches and label free quantification were performed using Progenesis QI for Proteomics. The mass~~  
113 ~~spectrometry raw data files, database search and quantification results have been deposited and can be~~  
114 ~~accessed via ProteomeXchange with identifier PXD007183. The resulting HL-60 cell-proteome profiles~~  
115 ~~has led us to investigate the corresponding biological activities of these cells by means of(e. g.~~  
116 ~~enzymatic, protein-and/ lipid oxidation, and cell proliferation assays) post cryopreservation. Proteins~~  
117 ~~were identified and quantified by using dedicated algorithms and searching against the Uniprot~~  
118 ~~proteomic database of *Homo sapiens* (version 2016/09), with the default parameters for ion accounting~~  
119 ~~[26]. The databases used were reversed “on the fly” during the database queries and appended to the~~  
120 ~~original database to assess the false positive identification rate. For proper spectral processing and~~  
121 ~~database searching conditions, we used Progenesis QI for Proteomics software package with Apex3D,~~  
122 ~~Peptide 3D, and Ion Accounting informatics (Waters Corporation). The label free protein quantitation~~  
123 ~~was done using Hi N (N=3) method [27]. This software starts with LC MS data loading and then~~  
124 ~~performs alignment and peak detection, which creates a list of interesting peptide ions (peptides) that~~  
125 ~~are explored within Peptide Ion Stats by multivariate statistical methods. The initial ion matching~~  
126 ~~requirements were  $\geq 1$  fragment per peptide,  $\geq 3$  fragments per protein and  $\geq 1$  peptide per protein. The~~  
127 ~~following parameters were considered in identifying peptides: 1) digestion by trypsin with at most two~~  
128 ~~missed cleavages; 2) variable modifications by oxidation (M) and glycosylation (O-GlcNAc-ST) and~~  
129 ~~fixed modification by carbamidomethyl (C); and 3) false discovery rate (FDR) less than 1%.~~

~~130 Identifications that did not satisfy these criteria were rejected. The Shapiro-Wilk W test analysis of  
 131 variance (ANOVA) was used to identify proteins that were present at different levels. Only those  
 132 findings with  $p$  values  $<0.05$  were considered as significant.~~

133

134

## 135 Analyses

136 Proteins found to present at significantly different levels in HL-60 cells cryopreserved in DMSO  
 137 alone ( $n=5$  replicates), DMSO+Nig ( $n=5$  replicates) or DMSO+Sal ( $n=5$  replicates) were classified  
 138 according to their biological and functional pathways. The Uniprot accession codes of differentially  
 139 expressed proteins or genes were mapped to Gene Ontology Annotation using a software  
 140 linked to Funrich database. ([http:// www.funrich.org](http://www.funrich.org)) [2829]. ~~Unique-The number of significantly  
 141 changing proteins ( $P<0.05$ ) that are expressed in HL-60 cryopreserved is DMSO, DMSO + Nig or  
 142 DMSO + Sal are illustrated in a Venn diagram (Figure 2A). and-Thus, the overlapping as well as the  
 143 uniquely expressed proteins (e. g. up/down-regulated) between the different arms of the study (Figure  
 144 1) are shown in Figure 2A. overlapping differentially expressed proteins of HL-60 cells  
 145 cryopreserved in DMSO +/- Nig or Sal are illustrated in (Figure 2).~~

146

## 147 Proteomic Analyses

~~148 Label-free quantitative shotgun proteomic analysis was used to identify HL-60 cell proteins found at  
 149 different levels in a comparison of post-cryopreservation in DMSO alone, DMSO +Nig or DMSO +  
 150 Sal.~~

151 Label-free quantitative shotgun proteomic analysis was used to identify HL-60 cell proteins found at  
 152 different levels post cryopreservation in DMSO alone, DMSO +Nig or DMSO + Sal ( $n= 5$   
 153 replicates/arm). In this study, cryopreservation has significantly induced changes in the abundances of  
 154 many proteins of HL-60 cryopreserved in DMSO +Nig group 1140 proteins (Table S2), DMSO + Sal  
 155 group 1032 proteins (Table S 3) and with only 886 proteins found changing for HL-60 cryopreserved

156 DMSO alone (Table S1). Some of the biologically relevant proteins expressed by HL-60 (i. e.  
 157 identified, quantified and differentially expressed) are summarised in Table 1.

158

159

160

161 Using the Funrich database, the *In silico* functional analysis of the proteomes has revealed the  
 162 following:

163 1) The effect of cryopreservation showed a higher number of ~~significantly quantified~~ differentially  
 164 expressed 1,140 proteins proteins (with P<0.05) for DMSO +Nig ~~(1,140 proteins~~ **Figure 2A)** and  
 165 DMSO + Sal (1,032 proteins; **Figure 2A)**, with only 8876 proteins found for DMSO alone (**Figure**  
 166 **2A)**. In addition, the Venn diagram analysis (Figure 2A) has shown that the highest number of uniquely  
 167 identified proteins was found in DMSO + Sal (n=231). Cells cryopreserved DMSO + Nig showed 224  
 168 proteins that are specifically expressed in the presence of Nig while the lowest number (n=158) of  
 169 uniquely expressed proteins (not found in DMSO + Sal or Nig treated cells) is in HL-60 cells  
 170 cryopreserved in DMSO.

171 2) The nature of biological pathways associated with cryo-damage of HL-60 cryopreserved in DMSO  
 172 alone and those which were differentially modulated by the CPAs post thaw. A proportionately high  
 173 number of proteins (21.05%) engaged in nucleotide and nucleobase regulation or DNA binding were  
 174 identified in HL-60 cells cryopreserved in DMSO + Sal. In contrast, the DMSO + Nig arm showed the  
 175 highest proportion of changes (16.8%) in proteins associated with energy pathways and protein  
 176 metabolism (**Figure 3A)**. Supplementing DMSO with Nig or Sal as CPAs also led to an increased level  
 177 of proteins with oxidoreductase activities, especially in the case of Nig (**Figure 3B)**. The level of  
 178 proteins linked to cell maintenance was the highest in HL-60 cells cryopreserved in DMSO alone  
 179 (12.5%) when compared to DMSO +Nig (8%) and DMSO + Sal (6.4%).

180

181 3) The percentage of recognised DNA binding proteins were estimated at 8.09% for cells  
 182 cryopreserved in DMSO + Sal while this did not exceed 2% in cells cryopreserved in DMSO +Nig  
 183 and DMSO alone (**Figure 3B)**. HL-60 protease activity-associated proteins were estimated at 4.4% in

184 DMSO +Nig, 3.1% in DMSO alone, while only reaching 2.02% in DMSO + Sal (**Figure 3B**). With  
 185 regards to cryo-stress, heat shock proteins were differentially expressed in HL-60 cells cryopreserved  
 186 in DMSO + Sal (1.2%) and DMSO alone (0.6%), whereas these proteins were not detected in cells  
 187 cryopreserved in the presence of Nig. The proteome profile reflecting the effect of freeze/thaw cycle  
 188 on HL-60 cells cryopreserved in DMSO alone and DMSO + Nig or Sal are summarised in **Table 1**.

189

190 *Oxido-redox functions (Table 1)*

191 Reduction in HL-60 cryo-oxidation was shown by an increased level of glutathione reductase and  
 192 superoxide dismutase [Cu-Zn] by 3.2 ad 1.4 fold, respectively, in DMSO alone (**Table 1**). However, no  
 193 significant change was detected in the levels of either of these markers for cells preserved in the  
 194 presence of Nig or Sal. In contrast, the levels of thioredoxin reductase-1 were increased up to 35 fold  
 195 when Nig was added and by 15 fold with the addition of Sal. A similar pattern was seen with the NADH-  
 196 ubiquinone oxidoreductase 75 kDa subunit. The level of pro-oxidative enzymes were all reduced in the  
 197 presence of CPAs such as peroxiredoxin (not detected in DMSO, downregulated by 2.0-fold in DMSO  
 198 + Nig and by 3.5-fold in DMSO + Sal), glutathione S-transferase Kappa-1 (decreased by 8-fold in  
 199 DMSO, decreased 13.6-fold in DMSO + Nig and decreased 3.5-fold in DMSO +Sal) and thioredoxin-  
 200 dependent peroxide reductase [decreased3.0-fold in DMSO, decreased 5.2 fold in DMSO + Nig and  
 201 decreased 8.8-fold in DMSO + Sal). Very long-chain specific acyl-CoA dehydrogenase (involved in  
 202 fatty acid  $\beta$ -oxidation) showed a 4-fold decreased level in HL-60 cells cryopreserved in DMSO + Nig  
 203 and a 5-fold decrease in DMSO + Sal compared to the levels in cells cryopreserved in DMSO alone. A  
 204 similar anti-oxidative pattern was observed in the presence of CPAs with increased levels of acyl-  
 205 coenzyme A oxidase (16.8 fold in DMSO + Nig and 42.7-fold in DMSO + Sal) and carbonyl oxidase  
 206 (5.5 fold in the presence of DMSO + Sal).

207 A differential response to cryo-stress was identified when Nig or Sal were added to media prior to and  
 208 post cryopreservation of HL-60 cells. For example, the stress-related protein Hsp 70-binding protein 1  
 209 was increased 14.4-fold in HL-60 cells cryopreserved in DMSO alone but its level decreased by 71-  
 210 and 77-folds in the presence of Nig or Sal respectively. In contrast, cytosolic stress response proteins

211 such as the heat shock 70 kDa protein 4 was not detected in DMSO +/- Nig and was increased by 2.3-  
 212 fold in DMSO + Sal. Finally, microsomal Hsp 70 protein-13 was not detected in HL-60 cells  
 213 cryopreserved in DMSO +/- Sal while this same protein was increased 15.8-fold in the presence of  
 214 DMSO + Nig.

215

#### 216 **Nuclear and cellular functions (Table 1)**

217 Twenty-four hours post thaw, incubation of HL-60 cell in Sal led to a marked increase in its nuclear  
 218 proteins as shown in **Table 1**. In the presence of Sal, the levels of proteins associated with DNA repair  
 219 were relatively increased such as DNA excision repair protein ERCC-6-like (-8.8-fold in Sal, ~~while not~~  
 220 ~~detected~~decreased by 13.8 in the presence of DMSO + Nig and decreased by 14.4-fold in DMSO alone),  
 221 mini-chromosome maintenance complex-binding protein (increased by 71-fold in DMSO + Sal, 11-fold  
 222 in DMSO + Nig and not detected in DMSO alone). Sal also enhanced the levels of proteins involved in  
 223 transcriptional regulation such as transcription factor TFIIB component B protein (increased by 11-  
 224 fold in DMSO + Sal, 8-fold in DMSO + Nig, and by 2-fold in DMSO alone).

225 In the presence of CPAs, the significantly altered levels of proteins associated with nuclear activities  
 226 were reflected by the changes in proteins associated with cell growth and cytosolic functions. For  
 227 example, the presence of Sal and Nig doubled the fold change of cyclin-G-associated kinase from a 4-  
 228 fold increase in DMSO alone, up to 8 or 9-fold increase in Nig and Sal, respectively. TBC1 domain  
 229 family member 2A, known to be involved in the regulation of GTPase activities and vesicle fusion, was  
 230 not detected only increased by 10.5 fold post thaw for HL-60 cryopreserved in DMSO alone while it  
 231 was increased in the presence of Nig by 11.2-fold and up to 39-fold in Sal. The levels of cytoskeletal  
 232 proteins were also increased by the CPAs such as ankyrin-2, microtubules-associated protein and  
 233 echinoderm microtubule-associated protein-like 1) which are known to be associated with cell shape.  
 234 Functions such as cell re-organisation and division were also increased in the presence of Nig and Sal  
 235 compared to DMSO alone (Table1).

236

#### 237 **HL-60 cell proliferation post thaw (Table 1)**

238 The number of HL-60 cells 24 h post thaw was estimated at  $265 \times 10^4$ ,  $130 \times 10^4$  and  $180 \times 10^4$  cells/mL  
239 for DMSO alone, DMSO + Nig and DMSO + Sal respectively (**Figure 4**). At 48 h, Sal increased the  
240 proliferative rate by 2.84-fold compared to cells cryopreserved in DMSO alone and this was 1.3-fold  
241 for DMSO + Nig compared to cells cryopreserved in DMSO alone ( $640 \times 10^4$  cells/mL). The direct  
242 comparison between the effect of Nig and Sal on cell growth rate at 48 h showed that the number of  
243 HL-60 cells in the presence Sal was at  $1820 \times 10^4$  cells/mL while this only reached  $860 \times 10^4$  cells/mL  
244 in the presence of Nig. Such an increase in the HL-60 cell proliferative rate post thaw in the presence  
245 of Sal was paralleled by the increase in the protein levels of ~~epidermal growth factor receptor (2.1 fold)~~  
246 ~~and~~ cyclin-G-associated kinase (9.8-fold) (**Table 1**). Finally, post thaw HL-60 cells were immediately  
247 centrifuged, washed three times with culture media and the resulting changes in cell viability during the  
248 recovery period up to 48 were negligible (<2%).

#### 250 **Biological profiles of HL-60 cryopreserved in DMSO +/- Nig or Sal**

251 HL-60 cell intracellular glutathione reductase (GR) activity was measured [n=5 replicates] prior to  
252 freezing and 24 h post thaw. GR activity was significantly increased in all cases. The presence of CPAs  
253 in the media significantly boosted GR activity from 0.0003 mU/mL prior to cryopreservation to 0.0005  
254 mU/mL in the presence of DMSO alone. The addition of Nig boosted GR activity post thaw even further  
255 reaching  $0.0013 \pm 0.00006$  mU/mL. Sal had the biggest effect on HL-60 cell GR activity with a reading  
256 of 0.0016 mU/mL (i.e. 3 times more increased compared to HL-60 cells cryopreserved in the standard  
257 DMSO cryomedia). HL-60 cell intracellular Lactate dehydrogenase (LDH) activities were also  
258 measured prior to freezing and 24 h post thaw [n=5 replicates]. Adding Sal to the culture or cryomedia  
259 lowered LDH readouts from  $0.1 \pm 0.03$  mU/mL in DMSO alone to  $0.04 \pm 0.01$  mU/mL in DMSO + Sal.  
260 Moreover, the addition of Nig had the biggest effect on lowering LDH activity by bringing this to  
261  $0.02 \pm 0.044$  mU/mL (3 times lower than prior to cryopreservation, 5 times less than DMSO alone and  
262 2 time less than DMSO + Sal).

264 Oxidation assays were conducted to investigate Nig and Sal cryo-protective properties against HL-60  
265 cells lipid (e. g. lipid peroxidation) and protein (e. g. Carbonylation) oxidation. HL-60 lipid  
266 peroxidation level was measured in triplicate prior to freezing, and 1 h and 24 h post thaw in the presence  
267 and absence of Nig or Sal. Measurement of MDA levels 1 h post thaw showed a significant increase in  
268 lipid oxidation with HL-60 cells cryopreserved in DMSO alone reaching an level of  $7.31 \pm 0.16$  nmol/mL  
269 (**Figure 5**). In contrast, this was approximately 40% lower in the presence of Nig ( $4.35 \pm 0.02$  nmol/mL)  
270 or Sal ( $4.53 \pm 0.09$  nmol/mL). In the recovery phase (e.g. 24 h post thaw), HL-60 cell lipid peroxidation  
271 levels reached control levels (e.g. prior to cryopreservation  $\sim 2.1$  nmol/mL). One day post thaw, lipid  
272 oxidation levels for HL-60 cells cryopreserved in DMSO +/- Nig or Sal reversed back to its prior  
273 cryopreservation level (**Figure 5**).

274  
275 As an indicator of oxidative stress, protein carbonylation assessment is widely used to reflect a major  
276 form of protein oxidation. Carbonylation assays were performed to assess the effect of CPAs on  
277 protein oxidation level post thaw. The results showed that protein carbonylation level for HL-60 cells  
278 cryopreserved in DMSO + Nig was kept at the level prior to freezing the cells and averaged  
279  $0.107 \pm 0.007$  nmol/mL (**Figure 6**) while Sal had no significant effect on protein oxidation level ( $\sim$   
280  $0.23 \pm 0.048$  nmol/mL). In the absence of cryo-additives, HL-60 cell levels of protein  
281 carbonylation/oxidation post freeze-thaw in DMSO alone were approximately  $0.26 \pm 0.016$  nmol/mL  
282 (**Figure 7**). Finally, Nig at 300  $\mu$ M showed an anti-oxidative effect by reducing non-cryopreserved  
283 HL-60 proteins carbonylation levels from 0.16 nmol/mL to 0.1 nmol/mL for cells growing in RPMI +  
284 300  $\mu$ M Nig, while this was only reduced to 0.13 nmol/mL in the presence of 200  $\mu$ M Sal (**Figure 7**).

## 286 Discussion

287 This is the first study aimed at establishing the proteomic and biological responses of HL-60 cells  
288 subjected to storage freezing in the presence of DMSO +/- novel CPAs. Many of the proteomic findings  
289 were validated by carrying out functional/biological assays targeting the main proteomic pathways  
290 identified. The major issue with the most commonly used permeating CPAs such as DMSO is their



1 291 cytotoxicity [2930], leading to low cell recovery. In the present study, HL-60 cells were incubated with  
2 292 Nig or Sal prior to and during cryopreservation. We subsequently identified differential proteome  
3  
4 293 profiles associated with HL-60 cryopreservation in DMSO +/- CPAs. For example the highest total  
5  
6 294 number of differentially expressed proteins was found in cells cryopreserved in a combination of DMSO  
7  
8 295 and Nig (37%), followed by 34% in DMSO and Sal, compared to only 29% for cells cryopreserved in  
9  
10 296 DMSO alone. This suggests that these two CPAs helped to preserve cellular proteins. The bulk of  
11  
12 297 previous proteome profiling studies investigating nucleated cell lines were either performed on the cells  
13  
14 298 without cryopreservation [3031], assessing pharmacological agent effects on specific cells [3132] or  
15  
16 299 comparison of cellular proteome profiles of healthy versus diseased patients [3233].  
17  
18  
19

20 300  
21  
22 301 The current finding demonstrated that the HL-60 cell line cryopreserved in DMSO alone exhibited an  
23  
24 302 increased level of proteins associated with oxidative stress (e. g. superoxide dismutase, acyl coA  
25  
26 303 oxidase or Hsp 70-binding protein 1) was interesting as these were mostly reversed in the presence of  
27  
28 304 Nig or Sal. Furthermore, protein deglycase, a protein known to play an important role as an oxidation  
29  
30 305 sensor [3334], was increased in the presence of DMSO + Sal only, suggesting the promotion of an anti-  
31  
32 306 oxidative environment. These findings are in line with reports of putative stress factors related to  
33  
34 307 cryopreservation [3435]. Furthermore, HL-60 cells cryopreserved in DMSO only showed a higher level  
35  
36 308 of lipid and protein oxidation, consistent with our proteome findings. Nevertheless, further proteomic  
37  
38 309 studies on nucleated cell lines are needed to address the issues of the proteome dynamic range or the  
39  
40 310 proteome profiles post cryopreservation. At this stage the most comprehensive proteomic analysis was  
41  
42 311 only performed on human nucleated cell lines prior their cryopreservation [31].  
43  
44  
45  
46

47 312  
48  
49 313 The present proteomic study showed that Nig or Sal used as CPAs for the cryopreservation of HL-60  
50  
51 314 cells can either have additive or counter-regulatory effects in comparison to DMSO. For example, in  
52  
53 315 response to cryo-stress, the level of NADH-ubiquinone oxidoreductase 75 kDa subunit, known to be  
54  
55 316 involved with cellular oxidative metabolism [3536], was upregulated in DMSO +/- Sal and even  
56  
57 317 reached higher levels in the presence of Nig. This suggests that the Nig effect is more likely to target  
58  
59 318 the mitochondrial machinery and reduce apoptosis as suggested by Ricci et al [3637]. We also found a  
60  
61  
62  
63  
64  
65

319 differential effect of Sal and Nig (when added to DMSO) on key enzymes associated with cryo-stress.

320 For example, ~~of~~LDH protein level was reduced when HL-60 cells were cryopreserved in DMSO alone  
 321 and the addition of Sal reversed its levels by increasing it up to 1.6 times.

322  
 323 Differential effect of CPAs on the proteomic outcome of HL-60 cell cryopreservation was also reflected

324 in the correlation between the increases in protein levels of glutathione reductase in the presence of

325 DMSO alone. Glutathione reductase is a critical enzyme known to promote the reductive environment

326 by protecting cells against the damaging effects of free radicals. Surprisingly, its protein levels were

327 not correlated with its activity, which was increased in the presence of Nig or Sal. Similar findings of

328 poor correlation between GR or LDH activities and protein levels have been reported elsewhere by

329 Glanemann et al [3738].

330 The heat shock 70 subunits reacted differentially to cryo-stress +/- CPAs. For example, Hsp70-binding

331 protein 1 decreased in the presence of CPAs and increased in the presence of DMSO. In contrast, Heat

332 shock 70 kDa protein 13 was not detected when HL-60 was cryopreserved in DMSO +/- Sal. The reason

333 for such differential expression patterns of Hsps is not clear but might be due to post-translational

334 modifications (e.g. carbonylation) and differential interactions with co-chaperones which might alter

335 their functions during cryo-stress [3839].

336

337 The current findings also support the role of Sal in reducing oxidative damage by promoting oxidative

338 DNA repair as shown for hematopoietic stem cells via the regulation of the base excision repair pathway

339 (e.g. poly(ADP-ribose) polymerase-1) [3940]. Post thaw, the level of expression of proteins associated

340 with transcriptional activities such as Rho GTPase activating protein 27 and Ras GTPase-activating-

341 like protein IQGAP2 were also increased by Sal in comparison to cells cryopreserved in DMSO alone.

342 This increase in the level of proteins associated with DNA repair/replication and transcriptional

343 activities in the presence of CPA also appeared to be mirrored by an increase in the level of proteins

344 associated with cellular growth. ~~For example, t~~The levels of epidermal growth factor receptor were

345 ~~increased-decrease here~~ by 2.1-fold in the presence of Sal, while it was undetected in the recovery phase

346 of HL-60 cells cryopreserved in DMSO +/- Nig. This receptor is generally known to be crucial in DNA

347 replication and cell division [4041] while its levels are unchanged when cryo-preserving human ovarian  
1  
2 348 tissue [42]. Such a regulatory element of the DNA damage signalling pathways is paramount for cell  
3  
4 349 survival by controlling passage from the S to the G2/M phases of the cell cycle [4443]. In line with our  
5  
6 350 proteomic findings, Sal has shown a noticeable promoting effect on HL-60 cell proliferation during the  
7  
8 351 recovery phase. A similar elevation in proliferative proteins was found in hepatocyte cells in response  
9  
10 352 to the proliferation promoter compound perfluorooctane sulfonate [424]. On the other hand, our  
11  
12 353 findings conflict with the reported effect of Sal on inducing breast cancer cell cycle arrest [4345]. Such  
13  
14 354 an anti-proliferative effect was previously attributed to Sal being used as anti-hypoxia agent leading to  
15  
16 355 suppression of hypoxia-induced cell proliferation [4446]. Finally, in the present study we have also  
17  
18 356 identified an additive effect of DMSO with Sal or Nig in enhancing some cellular functions by  
19  
20 357 increasing the level of cytoskeleton proteins such as ankyrin-2, synaptotagmin-like or microtubules  
21  
22 358 (**Table 1**) leading to a better HL-60 cell recovery and growth post thaw.  
23  
24  
25  
26

27 359  
28  
29 360 This is the first and largest targeted study aimed at deciphering proteomic profiles associated with the  
30  
31 361 cryopreservation of the nucleated human cell line (HL-60) in DMSO with and without novel cryo-  
32  
33 362 additives agent such as Nig. The proteome profiles associated with HL-60 cryopreservation in DMSO  
34  
35 363 +/- Nig or Sal were mostly validated at the biological level as these correlated with the corresponding  
36  
37 364 biological readouts (e.g. enzymatic, oxidation and proliferative assays). HL-60 cryopreservation in  
38  
39 365 DMSO only has led to oxidative damage and subsequently validating the already known biological  
40  
41 366 features associated with cryo-stress. More importantly, the addition of novel CPAs has identified a  
42  
43 367 potential synergistic or differential cryoprotective effect of these CPAs in comparison to cryopreserving  
44  
45 368 HL-60cells in DMSO only. Predominantly, this study has clearly shown that Nig reduces specifically  
46  
47 369 protein oxidation while Nig or Sal both reduce lipid cryo-oxidation. The presence The most striking  
48  
49 370 finding generated by the current proteomic profiling study is that post thaw, Sal increased the level of  
50  
51 371 proteins that are associated with nuclear activities and subsequently increased cell proliferation in the  
52  
53 372 recovery phase. The presence of CPAs (e. g. Nig or Sal) not only enhanced HL-60 cell recovery post  
54  
55 373 thaw but also significantly reduced cytotoxicity by decreasing the level of LDH activity (Figure 6)  
56  
57 374 generally used as a cytotoxicity marker [47].  
58  
59  
60  
61  
62  
63  
64  
65

375 In summary, identifying the relevant molecular (Proteomic analysis) and functional (biological  
376 readouts) pathways affected by cryopreservation and successfully targeting the compromised pathways  
377 with novel cryoprotective agents is a way forward to limit cryo-damage. The present findings will  
378 contribute to enhancing cryo-media formulation and potentially lead to improving future cell and  
379 regenerative tissue based therapies.

380

## 381 **Methods**

### 382 *Materials*

383 HL-60 cells, RPMI-1640 media, fetal Bovine serum (FBS), penicillin –streptomycin, nigerose,  
384 salidoside, sterilised filtered dulbecco’s phosphate buffer saline (DPBS), trypan blue solution cell  
385 culture, dimethylsulfoxide (DMSO), isopropanol, Tris base, urea, HCL, ammonium biocarbonate,  
386 acetonitrile, dithiotheritol (DTT), iodoacetamine (IAA), formic acid, radio immunoprecipitation assay  
387 (RIPA) buffer, protease inhibitor cocktail and milli-Q water were all purchased from Sigma-Aldrich  
388 (Poole, UK). Mr. Frosty™ Freezing Container was purchased from ThermoFisher scientific  
389 (Waltham, MA, USA). Certified Sep-Pak C18 cc vac cartridge was purchased from (Waters, UK).  
390 Sequence grade modified trypsin purchased from Promega (Southampton, UK). Glutathione  
391 reductase, lactate dehydrogenase and lipid peroxidation (MDA) assay kits were purchased from  
392 Abcam (Cambridge, UK). Protein carbonyl colorimetric assay kit was purchased from Cayman  
393 Chemical Company (Ann Arbor, MI, USA).

394

### 395 *Experimental design*

396 The study was divided into three arms (**Figure 1**). **Arm 1** involved culturing HL-60 cells up to 70%  
397 confluence in RPMI 1460 media, containing 10% (v/v) FBS and 50 U/mL penicillin-streptomycin. HL-  
398 60 cells were centrifuged at 100 x g for 5 min and the medium was immediately removed. HL-60 cells  
399 were re-suspended in freezing media (10% DMSO and 90% FBS) at 10<sup>6</sup> cells/mL, slowly frozen in  
400 cryogenic tubes and stored at -80°C overnight. Next, cells were cryopreserved either in the freezing

401 media in liquid nitrogen. HL-60 cells were thawed in a water bath at 37°C, centrifuged at 100 x g for 5  
 402 min and washed three times with RPMI media. Post thawing, HL-60 cells were cultured in a recovery  
 403 medium containing RPMI, 20% FBS, 5 U/mL penicillin-streptomycin and the FBS concentration was  
 404 reduced to 10% 24 h post thaw. HL-60 cells were cultured as described above for **Arm 1** with exception  
 405 of adding 300 µM Nig (**Arm 2**) or 200 µM Sal (**Arm 3**) for 24 h prior to cryopreservation, during  
 406 cryopreservation and up to 48 h post thaw. The selected concentrations of the cryo-additive agents (e.g.  
 407 Nig or Sal) were optimised as described in Supplement [S4S4](#). Cells were maintained at all times in  
 408 culture at 37°C under 5% CO<sub>2</sub>/ 95% air.

409 For proteomic and biochemical analysis (~~n = 5 batches of cells~~ Five replicates per arm), HL-60 cells  
 410 cryopreserved in DMSO +/- Nig or Sal were harvested at approximately 70% confluence prior to  
 411 freezing and at 24h or 48 h post thaw.

412

#### 413 *Sample preparation for ~~mass spectrometry~~ NanoLC-MS/MS analyses*

414 Human leukaemia (HL-60) cells were used as a nucleated cellular model to establish its proteome  
 415 profiles when cryo-preserved in DMSO with or without novel CPAs. The experimental design was set  
 416 up as described in Figure 1. Briefly, HL-60 cells were cultured in RPMI media, cryo-preserved in  
 417 freezing media (10% DMSO and 90% FBS) and recovered in RPMI media (Arm 1). For Arm 2 and 3,  
 418 300 µM Nig and 200 µM Sal were added respectively to the culture media 24 h prior, during  
 419 cryopreservation and up to 48 h post thaw. Extracted HL-60 proteins from HL-60 cells prior to and 24  
 420 h post cryopreservation were precipitated-extracted by acetone precipitation-mixing cell pellets with  
 421 cooled acetone. The cells Cell pellets were mixed with 100 µL cold (-20°C) acetone vortexed and,  
 422 incubated/kept for 60 min at -20°C for 60 min to allow protein precipitation. The samples were and  
 423 centrifuged at 13,000 x g for 10 min. pellets and air-dried at room temperature The supernatants  
 424 were decanted and tubes were uncapped to let the acetone evaporate at room temperature for 30 min.  
 425 Pelleted proteins were homogenised in 6 M urea buffer, vortexed and sonicated for 2 min. 70 mM  
 426 DTT was added to samples and incubated 30-60 min at room temperature. Next 140 mM Iodoacetic  
 427 acid alkylating reagent was added, followed by vortexing and incubation for 30-60 min at room  
 428 temperature. The urea concentration was reduced by adding 775 µL milliQ water and vortexing.

429 Protein concentrations were determined using the Bradford method. After this, 60 µg of extracted  
430 proteins were trypsinized in a 1:50 ratio, mixed carefully and left overnight at 37°C for digestion. The  
431 next day, the reactions were stopped via adjusting the pH to <6 by adding concentrated acetic acid.  
432 The digested peptides were purified using SEP-PAK C18 purification columns.

433

434 ~~Nano-high performance liquid chromatography-tandem mass spectrometry p~~[NanoLC-MS/MS Analyses](#)

435 ~~Qualitative and quantitative proteomic~~[Proteomic](#) analyses were performed in a bi-dimensional  
436 microUPLC tandem nanoESI-HDMS<sup>E</sup> platform by multiplexed data-independent acquisition  
437 experiments [27]. A 2D-RP/RP Acquity UPLC M-Class System (Waters Corporation=~~Milford, MA~~)  
438 coupled to a Synapt G2-Si [HDMS](#) mass spectrometer (Waters Corporation) platform was used. The  
439 samples were fractionated using a one-dimension reversed-phase approach. Peptide samples (0.5 µg)  
440 were loaded into a 100 Å, 1,8µm, 75 µm × 150 mm M-Class HSS T3 column (Waters Corporation).  
441 The fractionation was achieved by using an acetonitrile gradient from 7% to 40% (v/v) over 95 min at  
442 a flow rate of 0.4 µL/min directly into a Synapt G2-Si mass spectrometer. For every measurement, the  
443 mass spectrometer was operated in resolution mode with an m/z resolving power of about [240,000](#)  
444 FWHM, using ion mobility with a cross-section resolving power of at least 40 Ω /ΔΩ. MS and MS/MS  
445 data were acquired in positive ion mode using ion mobility separation of precursor ions (HDMS<sup>E</sup>) over  
446 a range of 50-2000 m/z. The lock mass channel was sampled every 30 s. The mass spectrometer was  
447 calibrated with a MS/MS spectrum of [Glu1]-fibrinopeptide B human (Glu-Fib) solution delivered  
448 through the reference sprayer of the NanoLock Spray source.

449

450 [Data processing and database searches](#)

451 [Proteins were identified and quantified by using dedicated algorithms and searching against the Uniprot](#)  
452 [proteomic database of \*Homo sapiens\* \(version 2016/09\) \[2648\]. The databases used were reversed “on](#)  
453 [the fly” during its queries and appended to the original database to assess the false-positive identification](#)  
454 [rate. For proper spectral processing, database searching and label free quantification, we used](#)  
455 [Progenesis QI for Proteomics software package with Apex3D, Peptide 3D, and Ion Accounting](#)

informatics (Waters Corporation). This software starts with loading of the LC-MS data, followed by alignment and peak detection, which creates a list of interesting peptide ions that are explored within Peptide Ion Stats by multivariate statistical methods. The processing parameters used were 150 counts for the low-energy threshold, 50.0 counts for the elevated energy threshold, and 750 counts for the intensity threshold. Automatic alignment of the runs (all runs in the experiment was assessed for suitability) was used for the processing. In peak picking, was used 8 as maximum ion charge and the sensitivity value was set ~~ted~~ as 4. Moreover, the following parameters were considered in identifying peptides: 1) digestion by trypsin with at most two missed cleavages; 2) variable modifications by oxidation (M) and fixed modification by carbamidomethyl (C); 3) false discovery rate (FDR) less than 1 %. One or more ion fragments per peptide, three or more fragments per protein and one or more peptides per protein were required for ion matching. Identifications that did not satisfy these criteria were rejected. The experiment design was ~~defined~~ summarized in **figure 1** (See Arm1, Arm2 and Arm3) and the label free protein quantitation was done using Hi-N (N=3) method [2749]. The Shapiro–Wilk W-test analysis of variance (ANOVA) was used to identify proteins that were present at different levels. Only those findings with  $p$ -values  $<0.05$  were considered as significant. ~~Moreover~~Finally, proteins with mean changes of 1.5-fold were considered as differentially expressed.

472

## 473 **Validation assays**

### 474 *Enzymatic activities*

475 HL-60 cell pellets were collected and washed in cold PBS once as described above and lysed in 350  $\mu$ L  
476 RIPA buffer and 2.85  $\mu$ L protease inhibitors and kept on ice for 30 min. Cell lysates were centrifuged  
477 at 100 x g for 5 min and enzymatic assays were performed using an amount equivalent to  $1 \times 10^6$  HL-  
478 60 cells according to the manufacturer's instructions. The glutathione reductase (GR) assay is based on  
479 measuring spectrophotometrically the resulting chromophore (TNB) [e.g. sulfhydryl-glutathione and  
480 5,5'-dithiobis (2-nitrobenzoic acid) (DNTB)] at 405 nm. The first and second readouts were measured  
481 at 5 and 10 min intervals using the Spectrostar Nano plate reader (Promega). Lactate dehydrogenase  
482 (LDH) assays were also performed according to the manufacturer's instructions. The quantity of NADH  
483 was detected spectrophotometrically at 450 nm by mixing NADH detection buffer with the cell

1 484 supernatant and lysate. The first readout was taken immediately and the samples were incubated in the  
2 485 dark at 37°C with a final colorimetric reading at 30 min.  
3

#### 4 486 *Protein and lipid oxidation assays*

5

6 487 Protein oxidation or carbonylation was measured in two sets of samples (each sample is composed of  
7  
8 488 3 sets of HL-60 cells pooled together) prior to cryopreservation and 24 h post thaw. The carbonylation  
9  
10 489 assay was performed according to the manufacturer's instructions. Briefly, a reaction between 2,4-  
11  
12 490 dinitrophenylhydrazine (DNPH) and oxidized carbonyl groups on proteins was conducted using  
13  
14 491 Cayman's protein assay kit. The derivatized carbonyl groups were quantitated by reading  
15  
16 492 spectrophotometrically at 375 nm. For lipid peroxidation, measurements were carried out in triplicate  
17  
18 493 on amounts equivalent to 10<sup>6</sup> cells/mL by identifying the formation of malondialdehyde-thiobarbituric  
19  
20 494 acid (MDA-TBA) adduct in acidic condition at 95°C for 1 h. Samples absorbance's were measured at  
21  
22 495 532 nm using the Spectrostar nano plate reader following the manufacturer's instructions.  
23  
24 496 Malondialdehyde (MDA) concentration was expressed in nmol.  
25  
26

#### 27 497 *Cell proliferation*

28

29 498 HL-60 cell viability and proliferation were assessed at 1 h, 24 h and 48 h post thaw. Cells were mixed  
30  
31 499 with trypan blue and placed on haemocytometer slides for counting under light microscope in duplicate  
32  
33 500 at each time point.  
34  
35

#### 36 501 *Statistical analysis*

37

38 502 All enzymatic assays were performed using five biological replicates. The lipid oxidation assay was  
39  
40 503 performed in triplicate and the protein carbonylation assay was carried out in duplicate. Results were  
41  
42 504 presented as mean ± standard deviation. Significant differences between groups were determined using  
43  
44 505 Student's t-test for paired and unpaired observations. *P* values <0.05 were considered significant.  
45  
46

47 506  
48  
49  
50

#### 51 507 *Availability of data materials*

52

53  
54 508 The mass spectrometry proteomics data have been deposited to the ProteomeXchange Consortium via  
55  
56 509 the PRIDE partner repository with the dataset identifier PXD006998.  
57  
58

59 510  
60  
61  
62  
63  
64  
65



**511 Abbreviations**

1  
2  
3  
4  
5  
6  
7  
8  
9  
10  
11  
12  
13  
14  
15  
16  
17  
18  
19  
20  
21  
22  
23  
24  
25  
26  
27  
28  
29  
30  
31  
32  
33  
34  
35  
36  
37  
38  
39  
40  
41  
42  
43  
44  
45  
46  
47  
48  
49  
50  
51  
52  
53  
54  
55  
56  
57  
58  
59  
60  
61  
62  
63  
64  
65

512 ANOVA: Analysis of variance

513 CPAs: Cryo-protective agents

514 DMSO: Dimethylsulfoxide

515 DNPH: Dinitrophenylhydrazine

516 DTT: Dithiotheritol

517 DPBS: Dulbecco's phosphate buffer saline

518 FDR: False discovery rate

519 FBS: Fetal Bovine Serum

520 FC: Fold Changes

521 Glu-Fib: Glu1-fibrinopeptide B human

522 GR: Glutathione reductase

523 HL-60: Human Leukaemia cells

524 LDH: Lactate dehydrogenase

525 MDA: Malondialdehyde

526 MDA-TBA: Malondialdehyde-thiobarbituric acid

527 Nig: Nigerose

528 ND: Not Detected

529 PT: Post thaw

530 PC: Prior cryopreservation

531 RIPA: Radio immunoprecipitation assay

532 Sal: Salidroside

533 DNTB: Sulfhydryl-glutathione and 5, 5'-dithiobis [2-nitrobenzoic acid]

534 UP: Unique peptides

535

536 **Declarations**

537 ***Ethics approval and consent to participate***

538 Not applicable.

539

540 ***Consent for publication***

541 Not applicable

542

543 ***Competing interests***

544 The authors declare no competing interests.

545

546 ***Funding***

547 This work was supported by the King AbdulAziz City for Science and Technology research fund. JSC

548 and DMS are funded by FAPESP (São Paulo Research Foundation, grants 2014/14881-1,

549 2013/08711-3 and 2014/10068-4) and CNPq (The Brazilian National Council for Scientific and

550 Technological Development, grant 460289/2014-4).

551

552 ***Author contributions***

553 NASA performed all experimental manipulations, sample preparation for mass spectrometry and

554 prepared the tables and figures and performed bioinformatic analysis. JSC performed sample

555 acquisition ~~sample acquisition~~ and data analysis mass spectrometry. DM supervised the proteomics

556 pipeline. NKHS co-supervised the project. HR designed and supervised the project, performed  
 1  
 2 557 biological interpretation of the data. NASA, JSC, DM, NKHS and HR wrote the manuscript. All  
 3  
 4 558 authors edited otherwise approved the final version of the manuscript.  
 5  
 6

7 559  
 8  
 9

## 10 560 **References**

- 11  
 12  
 13 561 1. Valeri CR, Ragno G, Pivacek LE, Cassidy GP, Srey R, Hansson-Wicher M, Leavy ME. An  
 14  
 15 562 Experiment with Glycerol-Frozen Red Blood Cells Stored at -80°C for up to 37 years. *Vox Sanguinis*  
 16  
 17 563 2000; 79(3):168–174.  
 18  
 19  
 20 564 2. Manson C, Brindley DA, Culme-Seymour EJ, Davie NL. Cell therapy industry: billion dollar  
 21  
 22 565 global business with unlimited potential. *Regen. Med.* 2011; (6):265-272.  
 23  
 24  
 25 566 3. Beirão J, Zilli L, Vilella S, Cabrita E, Schiavone R et al. Improving sperm cryopreservation with  
 26  
 27 567 antifreeze proteins: effect on gilthead seabream (*Sparus aurata*) plasma membrane lipids. *Biol Reprod.*  
 28  
 29 568 2012; 86 (2):59, 1-9  
 30  
 31  
 32  
 33 569 4. Alotaibi NAS, Slater, NKH, Rahmoune H. Salidroside as a Novel Protective Agent to Improve Red  
 34  
 35 570 Blood Cell Cryopreservation. *PLOS ONE* 2016; 11(9), e0162748.  
 36  
 37  
 38 571 5. Hunt, C. J. Cryopreservation of Human Stem Cells for Clinical Application: A Review. *Transfus.*  
 39  
 40 572 *Med. Hemother.* 2011; (38):107-123.  
 41  
 42  
 43 573 6. Fuller BJ. Cryoprotectants: the essential antifreezes to protect life in the frozen state. *Cryo letters*  
 44  
 45 574 2004; 25 (6), 375–88. Retrieved from <http://www.ncbi.nlm.nih.gov/pubmed/15660165>  
 46  
 47  
 48 575 7. Tatone C, Di Emidio G, Vento elena M, Artini PG. Cryopreservation and oxidative stress in  
 49  
 50 576 reproductive cells. *Gynecological Endocrinology* 2010; 26(8):563-567.  
 51  
 52  
 53  
 54 577 8. Xu X, Cowley S, Flaim, CJ, James W, Seymour L, Cui, Z. The roles of apoptotic pathways in the  
 55  
 56 578 low recovery rate after cryopreservation of dissociated human embryonic stem cells. *Biotech Prog.*  
 57  
 58 579 2010; 26(3):827–837.  
 59  
 60  
 61  
 62  
 63  
 64  
 65

- 580 9. Mathias FJ, D'Souza F, Uppangala S, Salian SR, Kalthur G, Adiga SK. Ovarian tissue vitrification  
1 is more efficient than slow freezing in protecting oocyte and granulosa cell DNA integrity. System  
2 581  
3  
4 582 *Biology in Reproductive Medicine* 2014; 60(6):317-322.  
5  
6  
7 583 10. Peris SI, Bilodeau JF, Dufour M, Bailey JL. Impact of cryopreservation and reactive oxygen  
8  
9 584 species on DNA integrity, lipid peroxidation, and functional parameters in ram sperm. *Molecular*  
10  
11 585 *Reproductive and Development* 2007; 74:878-892.  
12  
13  
14 586 11. Chen GQ, Ren L, Zhang J, Reed BM, Zhang D, Shen XH. Cryopreservation affects ROS-induced  
15  
16 587 oxidative stress and antioxidant response in *Arabidopsis* seedlings. *Cryobiology* 2015; 70(1):38-47.  
17  
18  
19 588 12. Bagchi A, Woods EJ, Crister JK. Cryopreservation and vitrification: recent advances in fertility  
20  
21 589 preservation technologies. *Expert Rev Med Devices* 2008; 5(3):359-370.  
22  
23  
24  
25 590 13. Wang S, Wang W, Xu Y, Tang M, Fang J, Sun H. et al. Proteomic characteristics of human sperm  
26  
27 591 cryopreservation. *Proteomics* 2014; 14(2-3): 298–310.  
28  
29  
30 592 14. Baumber J, Ball B, Linfor JJ. Assessment of cryopreservation of equine spermatozoa in the  
31  
32 593 presence of enzyme scavengers and antioxidants. *American Journal of Veterinary Research* 2005;  
33  
34 594 66(5):772-779.  
35  
36  
37 595 15. Martín-Ibáñez R, Hovatta O, Canals JM. Cryopreservation of Human Pluripotent Stem Cells: Are  
38  
39 596 We Going in the Right Direction?, Current Frontiers in Cryobiology 2012, Prof. Igor Katkov (Ed.),  
40  
41 597 ISBN: 978-953-51-0191-8.  
42  
43  
44 598 16. Gurruchaga H, del Burgo LS, Garate A, Delgado D, Sanchez P, Orive G, Ciriza J, Sanchez M,  
45  
46 599 Pedraz JL. Cryopreservation of Human Mesenchymal Stem Cells in an Allogeneic Bio-scaffold based  
47  
48 600 on Platelet Rich Plasma and Synovial Fluid Scientific. Reports 2017; 7(1): 15733.  
49  
50 601 DOI:10.1038/s41598-017-16134-6.  
51  
52  
53  
54 602 17. Choudhery MS, Badowski M, Muise A, Harris DT. Utility of cryopreserved umbilical cord tissue  
55  
56 603 for regenerative medicine. Current Stem Cell Research and Therapy 2013; 8(5):370-380.  
57  
58  
59  
60  
61  
62  
63  
64  
65

- 604 ~~1518~~. Stéphenne X, Najimi M, Sokal E. Hepatocyte cryopreservation: Is it time to change the  
605 strategy? World Journal of Gastroenterology 2010; 16(1), 1-14.
- 606 ~~1619~~. Nynca J, Arnold GJ, Frohlich T, Ciereszko A. Cryopreservation-induced alterations in protein  
607 composition of rainbow trout semen. Proteomics 2015; 15(15):2643-2654.
- 608 ~~1720~~. Sung JY, Md Saidur R, Woo SK, Do YR, Yoo JP, Myung GP. Proteomic identification of  
609 cryostress in epididymal spermatozoa. J Anim Sci Biotechnol. 2015; 7 (67):1-12.
- 610 ~~1821~~. Volk, G. M. Application of Functional Genomics and Proteomics to Plant Cryopreservation.  
611 Current Genomics 2010; 11(1):24-29.
- 612 ~~1922~~. Wagh V, Meganathan K, Hatap S, Gaspar JA, Winkler J, Spitkovsky D et al. Effects of  
613 cryopreservation on the transcriptome of human embryonic stem cells after thawing and culturing.  
614 Stem Cell Rev. 2011; 7(3):506-517.
- 615 ~~2023~~. Yoon SJ., Rahman MS, Kwon WS, Park YJ, Pang MG. Addition of Cryoprotectant  
616 Significantly Alters the Epididymal Sperm Proteome. PLoS ONE 2016; 11(3):e0152690.
- 617 ~~2124~~. Zilli L, Beirao J, Schiavone R, Herraes MP, Gnoni A, Vilella S. Comparative Proteome  
618 Analysis of Cryopreserved Flagella and Head Plasma Membrane Proteins from Sea Bream  
619 Spermatozoa: Effect of Antifreeze Proteins. PLOS ONE 2014; (6):e99992.
- 620 ~~2225~~. Kelly G. Rhodilla rosea: a possible plant adaptogen. Alter Med Rev. 2001; 3:293-302.
- 621 ~~2326~~. Qian EW, Ge DT, Kong, SK. Salidroside protects human erythrocytes against hydrogen  
622 peroxide-induced apoptosis. Journal of Natural Products 2012; 75(4):531-537.
- 623 ~~2427~~. Mastuda K, Watanabe H, Fujimoto K, Aso K. Isolation of Nigerose and Kojibiose from  
624 Dextrans. Nature 1961; 191:278,
- 625 ~~2528~~. Consonni R, Cagliani LR, Cogliati C. NMR Characterization of Saccharides in Italian Honeys  
626 of Different Floral Sources. J. Agric. Food Chem. 2012; 60 (18):4526-4534.
- 627 ~~26~~. Li, G. Z., Vissers, J. P., Silva, J. C., Golick, D., Gorenstein, M. V., Geromanos, S. J., Database  
628 searching and accounting of multiplexed precursor and product ion spectra from the data

- 629 ~~independent analysis of simple and complex peptide mixtures. Proteomics 2009; 9: 1696-~~  
1  
2 630 ~~1719~~Brandao Teles C, Martins de Souza D, Guest PC, Cassoli JS. MK 801 Treated  
3  
4 631 Oligodendrocytes as a Cellular Model to Study Schizophrenia. ~~Advances in experimental medicine~~  
5  
6 632 ~~and biology 2017; 974:269-277.~~  
7  
8  
9 633 ~~27.~~ Silva JC, Gorenstein MV, Li GZ, Vissers JP, Geromanos SJ. Absolute quantification of proteins  
10  
11 634 ~~by LCMSE: a virtue of parallel MS acquisition. Mol Cell Proteomics 2006; 5 (1):144-156.~~  
12  
13  
14 635 ~~2829.~~ Pathan M, et al. FunRich: An open access standalone functional enrichment and interaction  
15  
16 636 network analysis tool. Proteomics 2015; 15:2597-2601.  
17  
18  
19  
20 637 ~~2930.~~ Fahy G.M. Cryoprotectant toxicity: biochemical or osmotic? Cryo Letters 1984; 5:79–90.  
21  
22  
23 638 ~~3031.~~ Geiger T, Wehner A, Schaab C, Cox J, Mann M. Comparative proteomic analysis of eleven  
24  
25 639 common cell lines reveals ubiquitous but varying expression of most proteins. Mol Cell Proteomics  
26  
27 640 2012; 11(3):M111.014050.  
28  
29  
30 641 ~~321.~~ Marcucci F, Corti A, Berenson R. Ways to improve tumour uptake and penetration of drugs into  
31  
32 642 solid tumors. Frontiers Research Topics 2010; 3:1-14.  
33  
34  
35 643 ~~332.~~ Herberth M, Koethe D, Cheng T, Krzyszton ND, Schoeffmann S, Guest PC et al. Impaired  
36  
37 644 glycolytic response in peripheral blood mononuclear cells of first-onset antipsychotic-naive  
38  
39 645 schizophrenia patients. Mol Psychiatry 2011; 16(8):848-859.  
40  
41  
42 646 ~~3334.~~ Lunt SY, Vander Heiden MG. Aerobic glycolysis: meeting the metabolic requirements of cell  
43  
44 647 proliferation. Annu. Rev. Cell Dev. Biol. 2011; 27:441–464.  
45  
46  
47  
48 648 ~~3435.~~ Baust JG, Gao D, Baust, JM. Cryopreservation: An emerging paradigm change. Organogenesis  
49  
50 649 2009; 5(3):90–96.  
51  
52  
53 650 ~~3536.~~ Iuso A, Scacco S, Piccoli C, Bellomo F, Petruzzella V, Trentadue R et al. Dysfunctions of  
54  
55 651 cellular oxidative metabolism in patients with mutations in the NDUFS1 and NDUFS4 genes of  
56  
57 652 complex I. Biol . 2006; 281(15):10374-10380.  
58  
59  
60  
61  
62  
63  
64  
65

- 653 [3637](#). Ricci J, Munoz-Pinedo C, Fitzgerald P, Bailly-Maitre B, Perkins G, Yadava N et al. Disruption  
654 of mitochondrial function during apoptosis is mediated by caspase cleavage of the p75 subunit of  
655 complex I of the electron transport chain. *Cell* 2004; 117(6):773-786.
- 656 [3738](#). Glanemann C, Loos A, Gorret N et al. Disparity between changes in mRNA abundance and  
657 enzyme activity in *Corynebacterium glutamicum*: implications for DNA microarray analysis. *Appl*  
658 *Microbiol Biotechnol.* 2003; 61:61–68.
- 659 [3839](#). Mayer M. Hsp70 chaperone dynamics and molecular mechanism. *Trends in Biochem Sci.* 2013;  
660 38(10):507-514.
- 661 [3940](#). Xue Li, Ozlem E, Liang L, Qidong Y, Andrew W, Wei D. Binding to WGR Domain by  
662 Salidroside Activates PARP1 and Protects Hematopoietic Stem Cells from Oxidative Stress. *Antioxid*  
663 *Redox Signal* 2014; 20(12):1853–1865.
- 664 [4041](#). Oda K, Matsuoka Y, Funahashi A, Kitano H. A comprehensive pathway map of epidermal  
665 growth factor receptor signaling. *Mol Syst Biol.* 2005; doi: 10.1038/msb4100014.
- 666 [42. Jianping Qu, Pierre Arnaud Godin, Michelle Nisolle, Jacques Donnez \(2000\) Distribution and](#)  
667 [epidermal growth factor receptor expression of primordial follicles in human ovarian tissue before and](#)  
668 [after cryopreservation. Human Reproduction. 15 \(2\):302–310](#)
- 669 [434](#). Lou Z, Chini C, Minter-Dykhouse K, Chen J. Mediator of DNA damage checkpoint protein 1  
670 regulates BRCA1 localization and phosphorylation in DNA damage checkpoint control. *J Biol Chem.*  
671 2003; 278:13599-13602.
- 672 [442](#). Cui R, Zhanf H, Guo X, Cui Q, Wang J, Dai J. Proteomic analysis of cell proliferation in a  
673 human hepatic cell line (HL-7702) induced by perfluorooctane sulfonate using iTRAQ. *J Hazard*  
674 *Mater.* 2015; 299:361-370.
- 675 [453](#). Hu X, Zhang X, Qiu S, Yu D, Lin S. Salidroside induces cell-cycle arrest and apoptosis in breast  
676 cancer. *Biochemical and Biophysical Research Communications* 2011; 398(1):62-67.

677 [4446](#). Qi YJ, Cui S, Lu D, Yang YZ, Luo Y, Ma L et al. Effects of the aqueous extract of a Tibetan  
678 herb, *Rhodiola algida vartangutica* on proliferation and HIF-1 alfa, HIF-2 alfa expression in MCF-7  
679 cells under hypoxic condition in vitro. *Cancer Cell Int.* 2015; 15(81):1-9.

680 [47](#). [Niles A L, Moravec RA, Riss TL. In Vitro Viability and Cytotoxicity Testing and Same-Well](#)  
681 [Multi-Parametric Combinations for High Throughput Screening. Current Chemical Genomics 2009;](#)  
682 [3:33-41.](#)

683  
684 [2648](#). [Li, G. Z., Vissers, J. P., Silva, J. C., Golick, D., Gorenstein, M. V., Geromanos, S. J., Database](#)  
685 [searching and accounting of multiplexed precursor and product ion spectra from the data independent](#)  
686 [analysis of simple and complex peptide mixtures. Proteomics 2009; 9:1696-1719.](#)

687  
688 [2749](#). [Silva JC, Gorenstein MV, Li GZ, Vissers JP, Geromanos SJ. Absolute quantification of proteins](#)  
689 [by LCMSE: a virtue of parallel MS acquisition. Mol Cell Proteomics 2006; 5\(1\):144-56.](#)

690

691

692

693

694

695

696

697

698

699

700



701

1

2

3

702

4

5

703

6

7

8

704

9

10

705

11

12

706

13

14

707

15

16

708

17

18

709

19

20

710

21

22

711

23

24

712

25

26

713

27

28

714

29

30

715

31

32

716

33

34

717

35

36

718

37

38

719

39

40

720

41

42

721

43

44

722

45

46

723

47

48

724

**Figure. 1. Schematic diagram.** Experimental design of HL-60 cryopreserved in Dimethylsulfoxide (DMSO) [n=5] +/- Nigerose (Nig) [n=5 replicates] or Salidroside (Sal) [n=5 replicates]. Proteomic analysis and corresponding biological assays were conducted 24 h prior and post cryopreservation of HL-60 cell cultures grown in RPMI-1640 media (RPMI) +/- Nig or Sal.

**Figure. 2. Proteome analysis.** HL-60 total number of differentially expressed proteins cryopreserved in DMSO +/- Nig or Sal [n=5 per arm]. **A)** Venn diagram illustrating HL-60 cells unique and overlapped number of significantly changing proteins 24 h prior and post thaw. The numbers in the circles represent the number of identified genes significantly changing prior/post HL-60 cryopreserved in DMSO only [n=5 replicates], DMSO + Nig [n=5 replicates] or DMSO + Sal [n=5 replicates]. **B)** Table representing the total number of number of identified genes representing HL-60 upregulated (blue arrow) and downregulated (red arrow) proteins in each of the above cryo-condition.

**Figure. 3. Biological pathways analysis.** Comparative overview of the biological processes (**A**) and functional functions (**B**) representing mammalian HL-60 cells cryopreserved in DMSO +/- Nig or Sal. The percentage of proteins extracted from HL-60 cells cryopreserved in DMSO alone, DMSO/Nig or DMSO/Sal were identified using FunRich software.

725 **Figure 4. Cell growth.** HL-60 cell proliferation was measured in duplicate at 1h, 24 h and 48 h post  
 1  
 2 726 thaw. Cells were initially either cultured in RPMI media containing Nig (300  $\mu$ M) or Sal (200  $\mu$ M)  
 3  
 4 727 and cryopreserved in DMSO +/- Nig or Sal. HL-60 cells were thawed, washed and cultured in RPMI  
 5  
 6 728 media containing Nig (300  $\mu$ M) or Sal (200  $\mu$ M) for up to 48 h. Data are expressed as mean.

729 **Figure 5. Oxido-Redox enzymatic assays.** Intra-cellular enzymatic activities of HL-60 were measured  
 10  
 11 730 prior freezing (Control). Cells were frozen in DMSO +/- Sal or Nig and HL-60 GR and LDH activities  
 12  
 13 731 were measured in RPMI media only, RPMI +Nig (300  $\mu$ M) or in RPMI + Sal (200  $\mu$ M) 24 h post thaw.  
 14  
 15 732 **A)** Glutathione reductase (GR) activity (mU/ml). **B)** LDH activity (mU/ml). Data are presented as a  
 16  
 17 733 mean [n=5 replicates]  $\pm$  SD. (\* P value < 0.05).

734 **Figure 6. Lipid peroxidation (MDA) assay.** Lipid oxidation of HL-60 incubated prior and post thaw  
 22  
 23 735 in media +/- Nig or Sal and cryopreserved in DMSO +/- Nig (300  $\mu$ M) or Sal (200  $\mu$ M). The data are  
 24  
 25 736 represented in mean [n=3 replicates]  $\pm$  SD (\* P value <0.05).

737 **Figure 7. Protein carbonylation or oxidation of cryopreserved HL-60 cells.** The control represents  
 29  
 30 738 protein carbonylation level prior HL-60 cryopreservation in RPMI only, RPMI + 300  $\mu$ M Nig or  
 31  
 32 739 RPMI + 200  $\mu$ M Sal. Cells were cryopreserved in RPMI/DMSO +/- Nig or Sal and protein  
 33  
 34 740 carbonylation was measured in duplicate (each sample is composed of 3 sets of HL-60 cells pooled  
 35  
 36 741 together) 1 h post thaw in RPMI media containing Sal or Nig. Data are expressed as mean  $\pm$  SD (\* P  
 37  
 38 742 value <0.05).

743 **Table S1. Label-free LCMS/MS proteome analysis of Human promyelocytic leukemia HL-60 cells**  
 44 744 **cryopreserved in DMSO [n=5 replicates].**

745 **Table S2. Label-free LCMS/MS proteome analysis of Human promyelocytic leukemia HL-60 cells**  
1 746 **cryopreserved in DMSO + Nig [n=5 replicates].**  
2

3 747

4  
5 748 **Table S3. Label-free LCMS/MS proteome analysis of Human promyelocytic leukemia HL-60 cells**  
6 749 **cryopreserved in DMSO + Sal [n=5 replicates].**  
7

8 750

9  
10 751 **Figure S1S4. CPAs dose response.** The effect of Nig and Sal at different concentrations on HL-60 cell

11  
12 752 viability post cryopreservation in 10% DMSO +/- Nig or Sal. HL-60 cell cryosurvival was measured in

13  
14 753 triplicate using trypan blue.  
15

16  
17 754 **Table 1:** Proteins found at significantly different levels ( $p < 0.05$ ) using label-free LCMS/MS profiling  
18 755 of the human promyelocytic leukemia HL-60 cells cryopreserved in DMSO [n=5 replicates] +/- Sal  
19  
20 756 [n=5 replicates] or Nig [n=5 replicates].  
21

22  
23  
24  
25  
26  
27  
28  
29  
30  
31  
32  
33  
34  
35  
36  
37  
38  
39  
40  
41  
42  
43  
44  
45  
46  
47  
48  
49  
50  
51  
52  
53  
54  
55  
56  
57  
58  
59  
60  
61  
62  
63  
64  
65

| Uniprot entry                        | Protein name                                            | DMSO alone |                           | DMSO/nigerose   |                           | DMSO/salidroside |                           |
|--------------------------------------|---------------------------------------------------------|------------|---------------------------|-----------------|---------------------------|------------------|---------------------------|
|                                      |                                                         | UP         | FC<br><u>(log2 PC/PT)</u> | UP              | FC<br><u>(log2 PC/PT)</u> | UP               | FC<br><u>(log2 PC/PT)</u> |
| <b>Oxido-Redox</b>                   |                                                         |            |                           |                 |                           |                  |                           |
| Q99497                               | Protein deglycase DJ-1                                  | ND         |                           | ND              |                           | 12               | 1.4                       |
| P00338                               | Lactate dehydrogenase A chain                           | 11         | -1.6                      | ND              |                           | 11               | -1.6                      |
| P00390                               | Glutathione reductase                                   | 7          | 3.2                       | ND              |                           | ND               |                           |
| P00441                               | Superoxide dismutase [Cu-Zn]                            | 8          | 1.4                       | ND              |                           | ND               |                           |
| Q16881                               | Thioredoxin reductase 1                                 | 2          | 14.6                      | 2               | 35.0                      | 2                | 15                        |
| P28331                               | NADH-ubiquinone oxidoreductase 75 kDa subunit           | 4          | 4.9                       | 4               | 46.0                      | 4                | 16                        |
| Q9Y2Q3                               | Glutathione S-transferase kappa 1                       | 2          | -8.0                      | 2               | -13.6                     | 2                | -3.5                      |
| P30048                               | Thioredoxin-dependent peroxide reductase, mitochondrial | 2          | -3.0                      | 2               | -5.2                      | 2                | -8.8                      |
| C9J0G0                               | Acyl-coenzyme A oxidase (ACOX)                          | 2          | 32.0                      | 2               | 16.8                      | 2                | 42.7                      |
| P49748                               | Very long-chain specific acyl-CoA dehydrogenase         | 5          | -2.7                      | 5               | -11.6                     | 5                | -14.8                     |
| P16152                               | Carbonyl reductase                                      | ND         |                           | ND              |                           | 5                | -1.5                      |
| P49368                               | T-complex protein 1 subunit gamma                       | ND         |                           | 17              | 1.2                       | ND               |                           |
| P40227                               | T-complex protein 1 subunit zeta                        | ND         |                           | 7               | 1.4                       | ND               |                           |
| Q9NZL4                               | Hsp70-binding protein 1                                 | 3          | 14.4                      | 3               | -71                       | 3                | -77.0                     |
| P48723                               | Heat shock 70 kDa protein 13                            | ND         |                           | 2               | 15.8                      | ND               |                           |
| P34932                               | Heat shock 70 kDa protein 4                             | ND         |                           | ND              |                           | 17               | 1.3                       |
| Q53EL6                               | Programmed cell death protein 4                         | ND         |                           | ND              |                           | 4                | -1.6                      |
| P08758                               | Annexin A5 (Annexin-V)                                  | 6          | -6.6                      | 6               | -9.2                      | 6                | -4.5                      |
| Q5VT06                               | Centrosome-associated protein 350                       | 29         | 88.9                      | 29              | 61.2                      | 29               | 81.2                      |
| P25787                               | Proteosome subunit alpha type-2 (PSAT2)                 | ND         |                           | 3               | 34.4                      | ND               |                           |
| <b>Nuclear activities regulation</b> |                                                         |            |                           |                 |                           |                  |                           |
| Q9BTE3                               | Mini-chromosome maintenance complex-binding protein     | ND         |                           | 2               | 11.0                      | 2                | 70.0                      |
| P33993                               | DNA replication licensing factor MCM7                   | ND         |                           | <del>ND</del> 9 | <u>-3.5</u>               | 9                | <u>-2.4</u>               |
| P35658                               | Nuclear pore complex protein Nup214                     | ND         |                           | ND              |                           | 6                | 1.6                       |
| Q86YP4                               | Transcriptional repressor p66-alpha                     | ND         |                           | ND              |                           | 11               | 2.5                       |
| Q5T890                               | DNA excision repair protein ERCC-6-like                 | 4          | -14.4                     | <del>ND</del> 4 | <u>-13.8</u>              | 4                | <u>-8.8</u>               |
| Q99973                               | Telomerase protein component 1                          | ND         |                           | 3               | -2.3                      | 3                | -2.3                      |
| Q8WXI9                               | Transcriptional repressor p66-beta                      | 4          | -2.6                      | ND              |                           | ND               |                           |
| O14980                               | Exportin-1                                              | 5          | 3.0                       | ND              |                           | 5                | 3.7                       |

16  
17  
18  
19  
20  
21  
22  
23  
24  
25  
26  
27  
28  
29  
30  
31  
32  
33  
34  
35  
36  
37  
38  
39  
40  
41  
42  
43  
44  
45  
46  
47  
48  
49  
50  
51  
52  
53  
54  
55  
56  
57  
58  
59  
60  
61  
62  
63  
64  
65

32

|                                 |                                                            |            |             |    |              |    |              |
|---------------------------------|------------------------------------------------------------|------------|-------------|----|--------------|----|--------------|
| A6H8Y1                          | Transcription factor TFIIIB component B                    | 9          | 2.1         | 9  | 7.9          | 9  | 10.6         |
| Q15054                          | DNA polymerase delta subunit 3                             | 2          | <u>-3.4</u> | 2  | <u>-30.0</u> | 2  | <u>-22.3</u> |
| <b>Cell growth and function</b> |                                                            |            |             |    |              |    |              |
| P00533                          | Epidermal growth factor receptor                           | ND         |             | ND |              | 4  | -2.1         |
| Q14676                          | Mediator of DNA damage checkpoint protein 1                | ND         |             | 5  | 17.0         | 5  | 21.4         |
| Q6ZUM4                          | Rho GTPase-activating protein 27                           | 2          | 13.7        | 2  | 39.5         | 2  | 75.4         |
| Q9BYX2                          | TBC1 domain family member 2A                               | <u>ND3</u> | <u>10.5</u> | 3  | 11.2         | 3  | 39.0         |
| O14976                          | Cyclin-G-associated kinase                                 | 4          | 4.1         | 4  | 8.5          | 4  | 9.8          |
| Q8N163                          | Cell cycle and apoptosis regulator protein 2               | <u>ND9</u> | <u>1.5</u>  | 9  | 1.8          | 9  | 2.3          |
| O94986                          | Centrosomal protein 152 KDa                                | ND         |             | 7  | 59.8         | 7  | 19.0         |
| Q13576                          | RasGTPase-activating-like protein IQGAP2                   | 4          | 15.2        | 4  | 65.7         | 4  | 40.9         |
| Q14789                          | Golgin subfamily B member                                  | 14         | 18.9        | 14 | 37.2         | 14 | 21.3         |
| P49327                          | Fatty acid synthase                                        | ND         |             | 39 | 10.4         | 39 | <u>9.0</u>   |
| Q01484                          | Ankyrin-2                                                  | 17         | 32.0        | 17 | 39.7         | 17 | 48.8         |
| O00423                          | Echinoderm microtubule-associated protein-like 1           | 4          | 23.0        | 4  | 42.0         | 4  | 32.2         |
| A0A0U1RR07                      | Synaptotagmin-like protein 2                               | 4          | 4.1         | 4  | 9.0          | 4  | 22.0         |
| Q15691                          | Microtubule-associated protein RP/EB family member 1       | 10         | 7.1         | 10 | 3.2          | 10 | 7.1          |
| E9PNZ4                          | Microtubule-actin cross-linking factor 1, isoforms 1/2/3/5 | 2          | 12.6        | 2  | 12.3         | 2  | 4.4          |

Abbreviations: UP = unique peptides, ND = Not Detected, FC = Fold Changes indicating the ratio of differentially expressed proteins identified prior cryopreservation (PC) and post thaw (PT).

Figure. 1

768

769

770

771

772

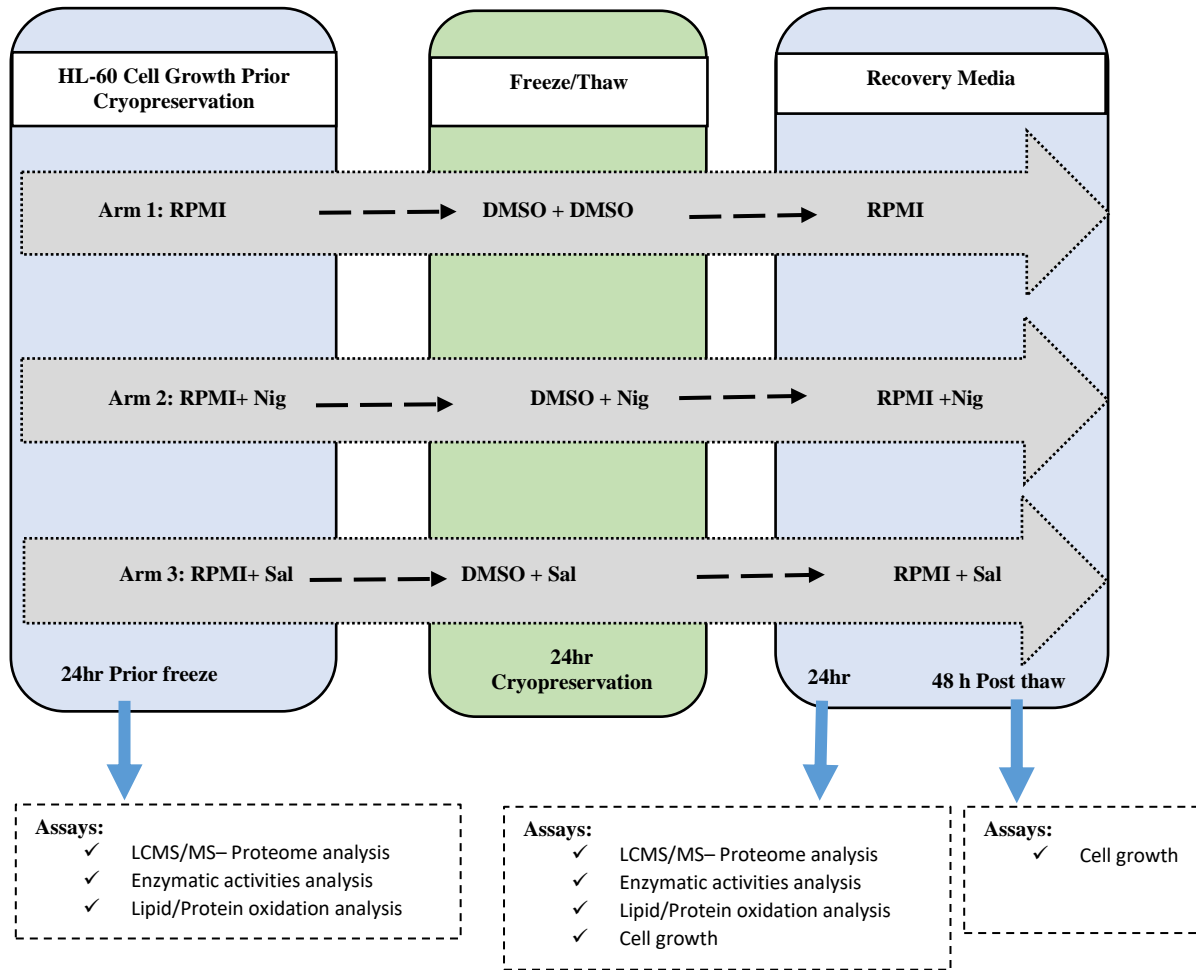

16  
17  
18  
19  
20  
21  
22  
23  
24  
25  
26  
27  
28  
29  
30  
31  
32  
33  
34  
35  
36  
37  
38  
39  
40  
41  
42  
43  
44  
45  
46  
47  
48  
49  
50  
51  
52  
53  
54  
55  
56  
57  
58  
59  
60  
61  
62  
63  
64  
65

773 **Figure 2.**

774  
775 **A)**

| Conditions                 | DMSO only          | DMSO/Nig | DMSO/Sal |
|----------------------------|--------------------|----------|----------|
| No. of identified proteins | <del>887</del> 886 | 1140     | 1032     |
| No. of identified genes    | 892                | 1152     | 1059     |

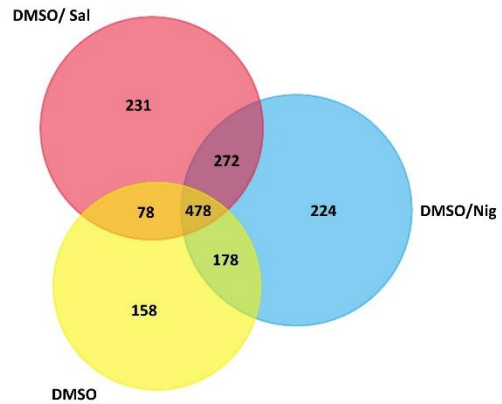

786 **B)**

| Up/down regulated | DMSO only | DMSO/Nig | DMSO/Sal |
|-------------------|-----------|----------|----------|
| ↑                 | 484       | 536      | 491      |
| ↓                 | 403       | 604      | 541      |

16  
17  
18  
19  
20  
21  
22  
23  
24  
25  
26  
27  
28  
29  
30  
31  
32  
33  
34  
35  
36  
37  
38  
39  
40  
41  
42  
43  
44  
45  
46  
47  
48  
49  
50  
51  
52  
53  
54  
55  
56  
57  
58  
59  
60  
61  
62  
63  
64  
65

**Figure 3.**

35

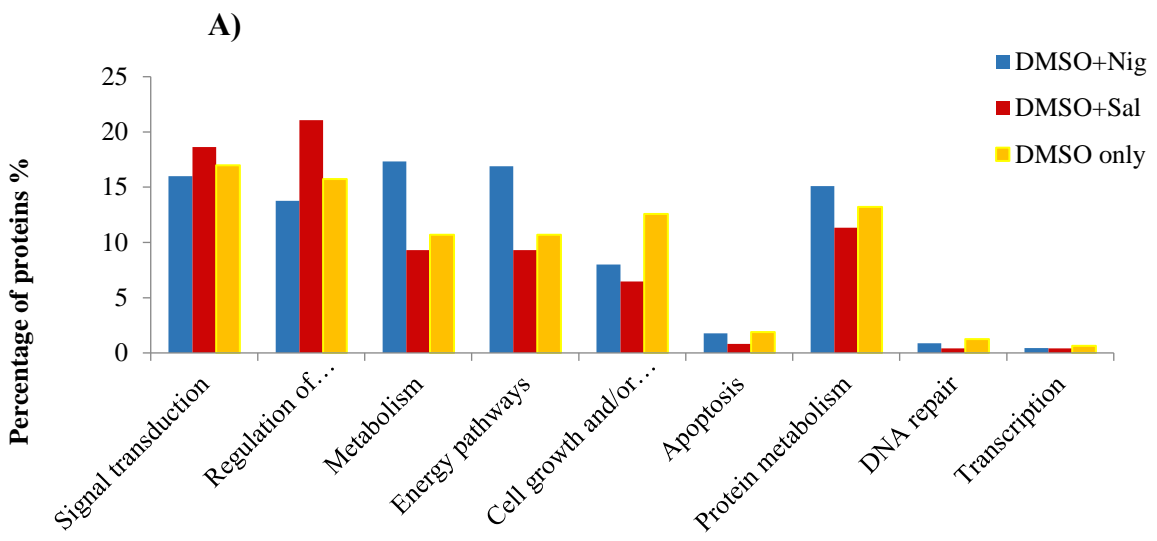

787

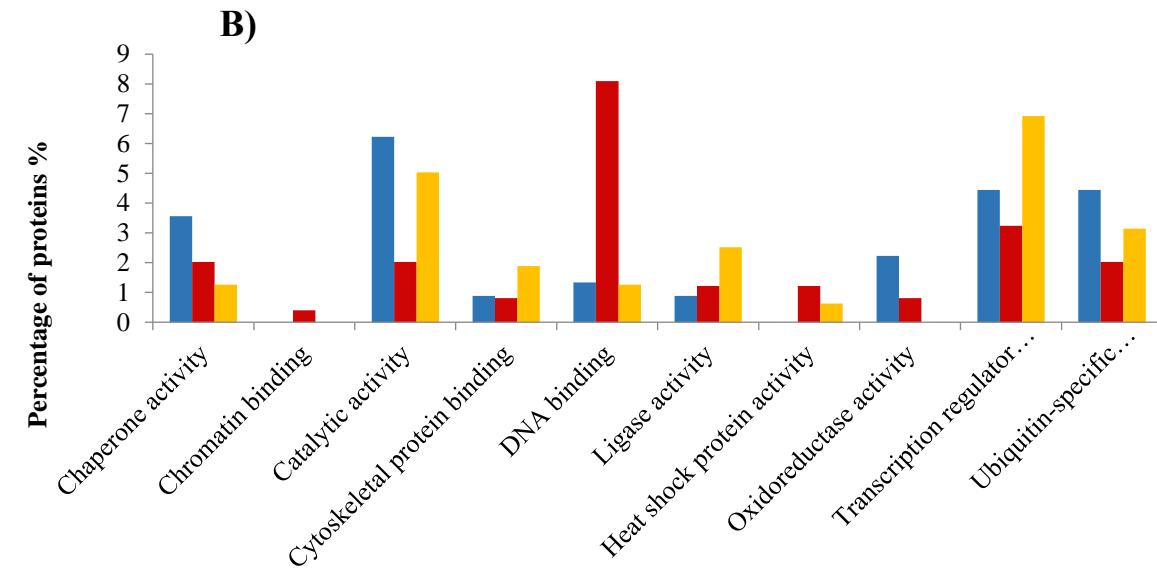

788

789



Figure 4.

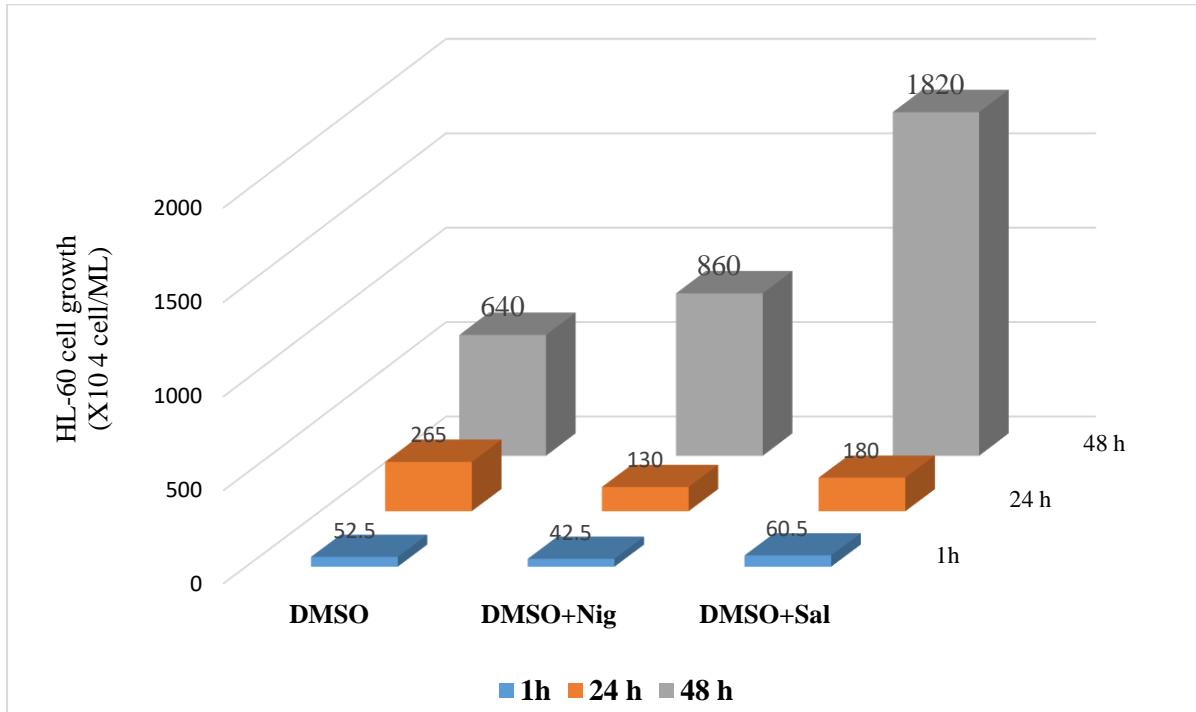

15  
16  
17  
18  
19  
20  
21  
22  
23  
24  
25  
26  
27  
28  
29  
30  
31  
32  
33  
34  
35  
36  
37  
38  
39  
40  
41  
42  
43  
44  
45  
46  
47 799  
48 800  
49 801  
50 802  
51 803  
52 804  
53 805  
54  
55  
56  
57  
58  
59  
60  
61  
62  
63  
64  
65

FIG.5

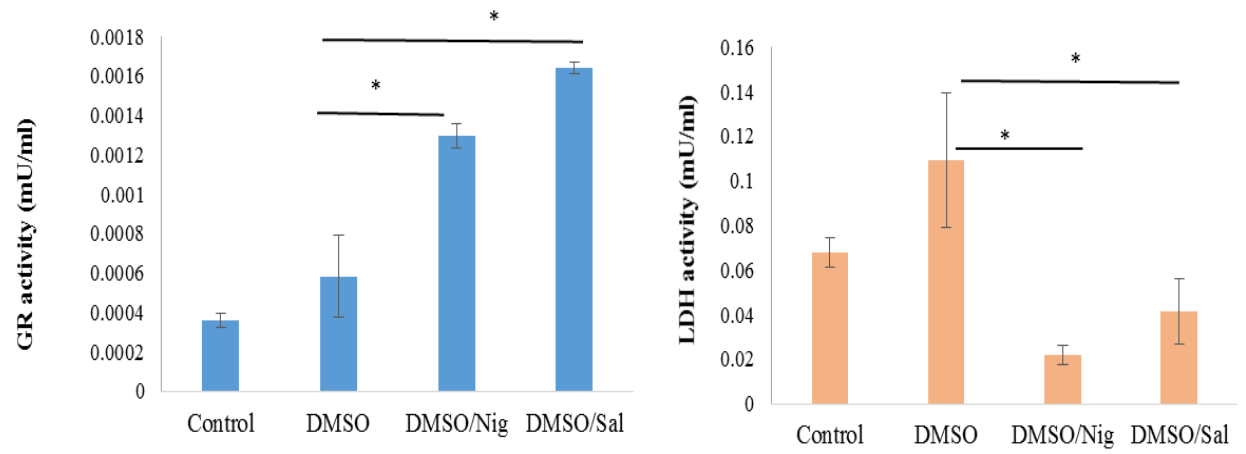

Figure 6.

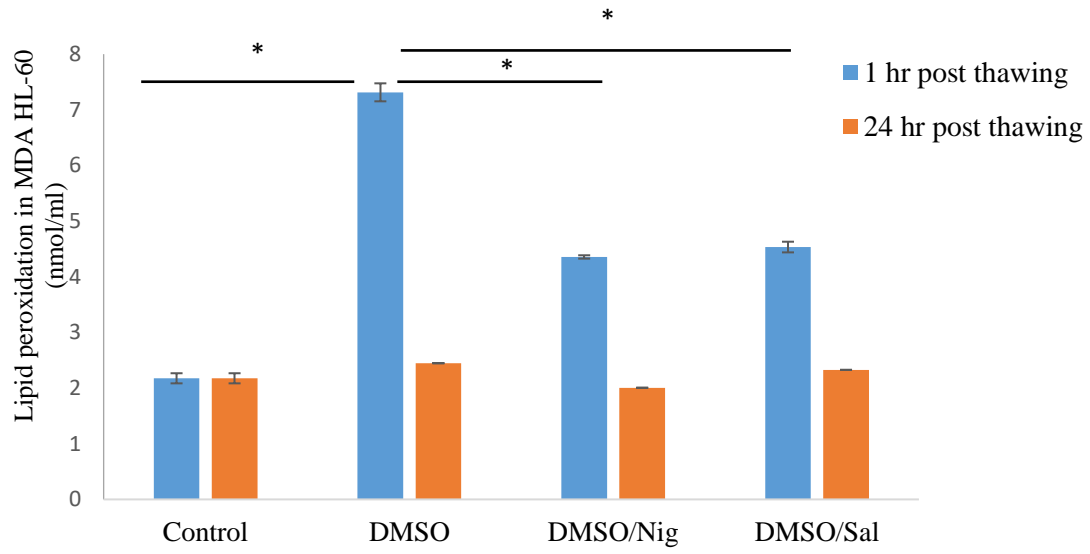

Figure 7.

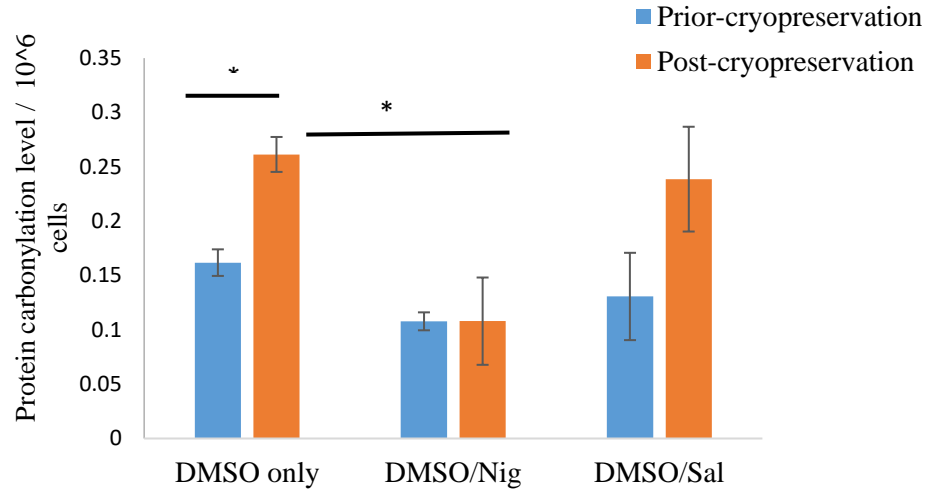

16  
17  
18  
19  
20  
21  
22  
23  
24  
25  
26  
27  
28  
29  
30  
31  
32  
33  
34  
35  
36  
37  
38  
39  
40  
41  
42  
43  
44  
45  
46  
47  
48  
49  
50  
51  
52  
53  
54  
55  
56  
57  
58  
59  
60  
61  
62  
63  
64  
65

Supplement **S1S4**

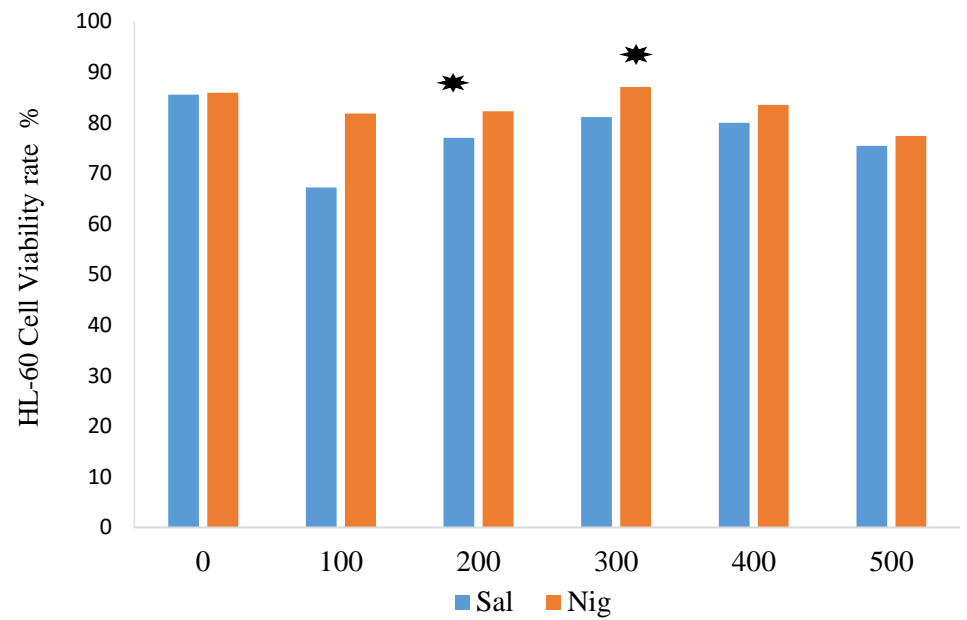

| Uniprot entry                        | Protein name                                            | DMSO alone |                   | DMSO/nigerose |                    | DMSO/salidroside |                    |
|--------------------------------------|---------------------------------------------------------|------------|-------------------|---------------|--------------------|------------------|--------------------|
|                                      |                                                         | UP         | FC<br>(log2PC/PT) | UP            | FC<br>(log2 PC/PT) | UP               | FC<br>(log2 PC/PT) |
| <b>Oxido-Redox</b>                   |                                                         |            |                   |               |                    |                  |                    |
| Q99497                               | Protein deglycase DJ-1                                  | ND         |                   | ND            |                    | 12               | 1.4                |
| P00338                               | Lactate dehydrogenase A chain                           | 11         | -1.6              | ND            |                    | 11               | -1.6               |
| P00390                               | Glutathione reductase                                   | 7          | 3.2               | ND            |                    | ND               |                    |
| P00441                               | Superoxide dismutase [Cu-Zn]                            | 8          | 1.4               | ND            |                    | ND               |                    |
| Q16881                               | Thioredoxin reductase 1                                 | 2          | 14.6              | 2             | 35.0               | 2                | 15                 |
| P28331                               | NADH-ubiquinone oxidoreductase 75 kDa subunit           | 4          | 4.9               | 4             | 46.0               | 4                | 16                 |
| Q9Y2Q3                               | Glutathione S-transferase kappa 1                       | 2          | -8.0              | 2             | -13.6              | 2                | -3.5               |
| P30048                               | Thioredoxin-dependent peroxide reductase, mitochondrial | 2          | -3.0              | 2             | -5.2               | 2                | -8.8               |
| C9J0G0                               | Acyl-coenzyme A oxidase (ACOX)                          | 2          | 32.0              | 2             | 16.8               | 2                | 42.7               |
| P49748                               | Very long-chain specific acyl-CoA dehydrogenase         | 5          | -2.7              | 5             | -11.6              | 5                | -14.8              |
| P16152                               | Carbonyl reductase                                      | ND         |                   | ND            |                    | 5                | -1.5               |
| P49368                               | T-complex protein 1 subunit gamma                       | ND         |                   | 17            | 1.2                | ND               |                    |
| P40227                               | T-complex protein 1 subunit zeta                        | ND         |                   | 7             | 1.4                | ND               |                    |
| Q9NZL4                               | Hsp70-binding protein 1                                 | 3          | 14.4              | 3             | -71                | 3                | -77.0              |
| P48723                               | Heat shock 70 kDa protein 13                            | ND         |                   | 2             | 15.8               | ND               |                    |
| P34932                               | Heat shock 70 kDa protein 4                             | ND         |                   | ND            |                    | 17               | 1.3                |
| Q53EL6                               | Programmed cell death protein 4                         | ND         |                   | ND            |                    | 4                | 1.6                |
| P08758                               | Annexin A5 (Annexin-V)                                  | 6          | -6.6              | 6             | -9.2               | 6                | 4.5                |
| Q5VT06                               | Centrosome-associated protein 350                       | 29         | 88.9              | 29            | 61.2               | 29               | 81.2               |
| P25787                               | Proteosome subunit alpha type-2 (PSAT2)                 | ND         |                   | 3             | 34.4               | ND               |                    |
| <b>Nuclear activities regulation</b> |                                                         |            |                   |               |                    |                  |                    |
| Q9BTE3                               | Mini-chromosome maintenance complex-binding protein     | ND         |                   | 2             | 11.0               | 2                | 70.0               |
| P33993                               | DNA replication licensing factor MCM7                   | ND         |                   | 9             | -3.5               | 9                | -2.4               |
| P35658                               | Nuclear pore complex protein Nup214                     | ND         |                   | ND            |                    | 6                | 1.6                |
| Q86YP4                               | Transcriptional repressor p66-alpha                     | ND         |                   | ND            |                    | 11               | 2.5                |
| Q5T890                               | DNA excision repair protein ERCC-6-like                 | 4          | -14.4             | 4             | -13.8              | 4                | -8.8               |
| Q99973                               | Telomerase protein component 1                          | ND         |                   | 3             | -2.3               | 3                | -2.3               |
| Q8WXI9                               | Transcriptional repressor p66-beta                      | 4          | -2.6              | ND            |                    | ND               |                    |
| O14980                               | Exportin-1                                              | 5          | 3.0               | ND            |                    | 5                | 3.7                |
| A6H8Y1                               | Transcription factor TFIIIB component B                 | 9          | 2.1               | 9             | 7.9                | 9                | 10.6               |
| Q15054                               | DNA polymerase delta subunit 3                          | 2          | -3.4              | 2             | -30.0              | 2                | -22.3              |

| Cell growth and function |                                                            |    |      |    |      |       |      |
|--------------------------|------------------------------------------------------------|----|------|----|------|-------|------|
| P00533                   | Epidermal growth factor receptor                           | ND |      | ND | 4    | - 2.1 |      |
| Q14676                   | Mediator of DNA damage checkpoint protein 1                | ND |      | 5  | 17.0 | 5     | 21.4 |
| Q6ZUM4                   | Rho GTPase-activating protein 27                           | 2  | 13.7 | 2  | 39.5 | 2     | 75.4 |
| Q9BYX2                   | TBC1 domain family member 2A                               | 3  | 10.5 | 3  | 11.2 | 3     | 39.0 |
| O14976                   | Cyclin-G-associated kinase                                 | 4  | 4.1  | 4  | 8.5  | 4     | 9.8  |
| Q8N163                   | Cell cycle and apoptosis regulator protein 2               | 9  | 1.5  | 9  | 1.8  | 9     | 2.3  |
| O94986                   | Centrosomal protein 152 KDa                                | ND |      | 7  | 59.8 | 7     | 19.0 |
| Q13576                   | RasGTPase-activating-like protein IQGAP2                   | 4  | 15.2 | 4  | 65.7 | 4     | 40.9 |
| Q14789                   | Golgin subfamily B member                                  | 14 | 18.9 | 14 | 37.2 | 14    | 21.3 |
| P49327                   | Fatty acid synthase                                        | ND |      | 39 | 10.4 | 39    | 9.0  |
| Q01484                   | Ankyrin-2                                                  | 17 | 32.0 | 17 | 39.7 | 17    | 48.8 |
| O00423                   | Echinoderm microtubule-associated protein-like 1           | 4  | 23.0 | 4  | 42.0 | 4     | 32.2 |
| A0A0U1RR07               | Synaptotagmin-like protein 2                               | 4  | 4.1  | 4  | 9.0  | 4     | 22.0 |
| Q15691                   | Microtubule-associated protein RP/EB family member 1       | 10 | 7.1  | 10 | 3.2  | 10    | 7.1  |
| E9PNZ4                   | Microtubule-actin cross-linking factor 1, isoforms 1/2/3/5 | 2  | 12.6 | 2  | 12.3 | 2     | 4.4  |

Abbreviations: UP = unique peptides, ND = Not Detected, FC = Fold Changes indicating the ratio of differentially expressed proteins identified prior cryopreservation (PC) and post thaw (PT).

Figure. 1

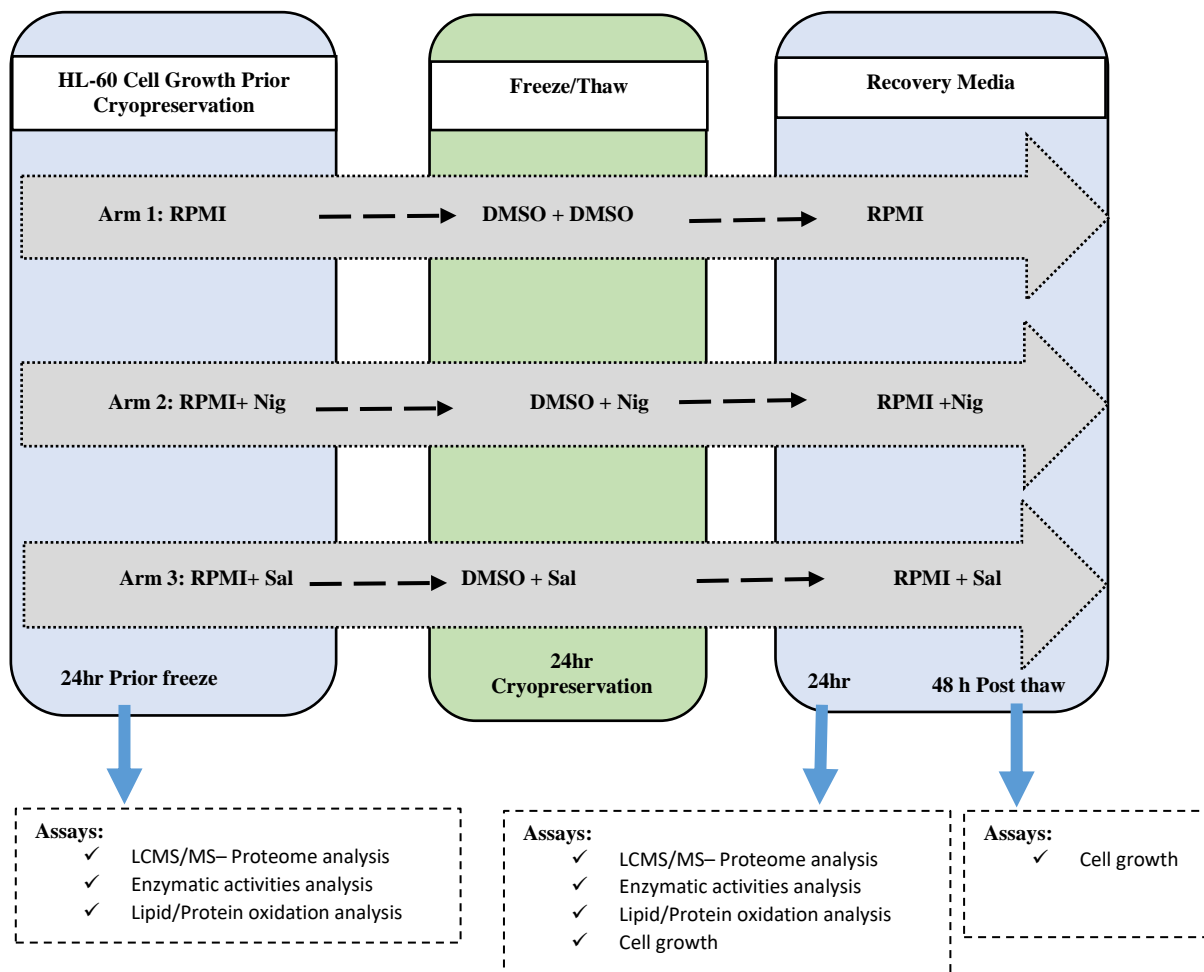



**Figure 2.****A)**

| Conditions                 | DMSO only | DMSO/Nig | DMSO/Sal |
|----------------------------|-----------|----------|----------|
| No. of identified proteins | 887       | 1140     | 1032     |
| No. of identified genes    | 892       | 1152     | 1059     |

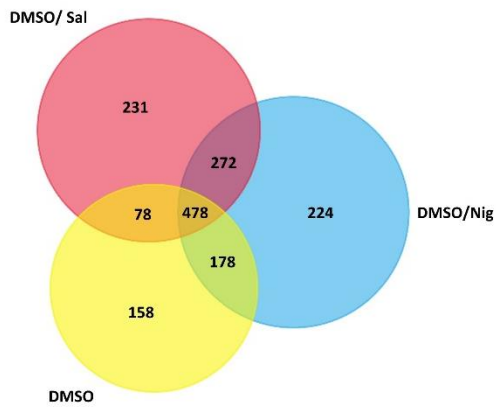**B)**

| Up/down regulated | DMSO only | DMSO/Nig | DMSO/Sal |
|-------------------|-----------|----------|----------|
| ↑                 | 484       | 536      | 491      |
| ↓                 | 403       | 604      | 541      |

Figure 3.

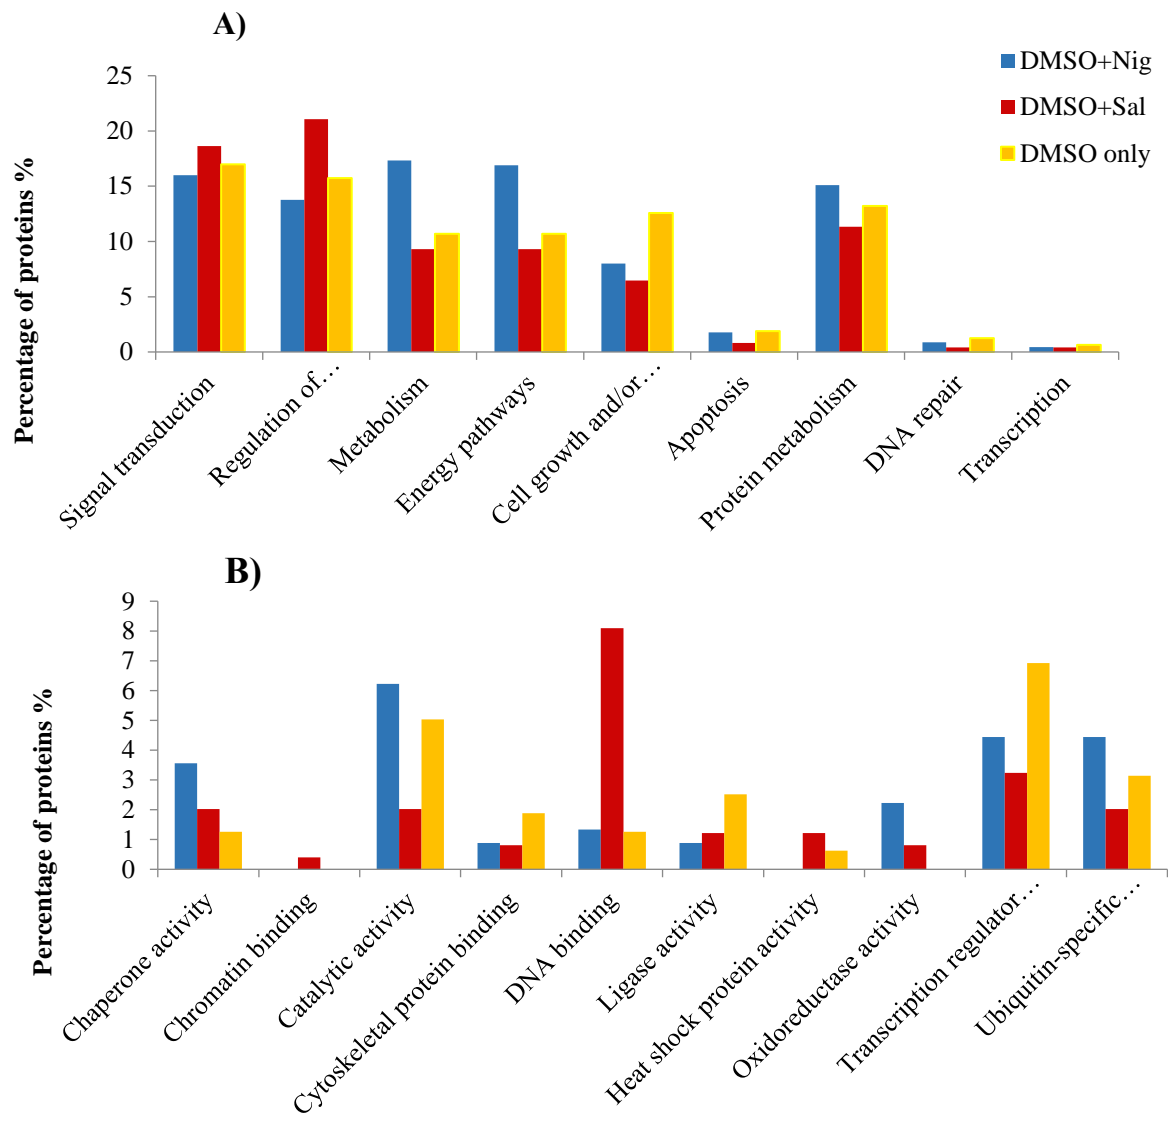

Figure 4.

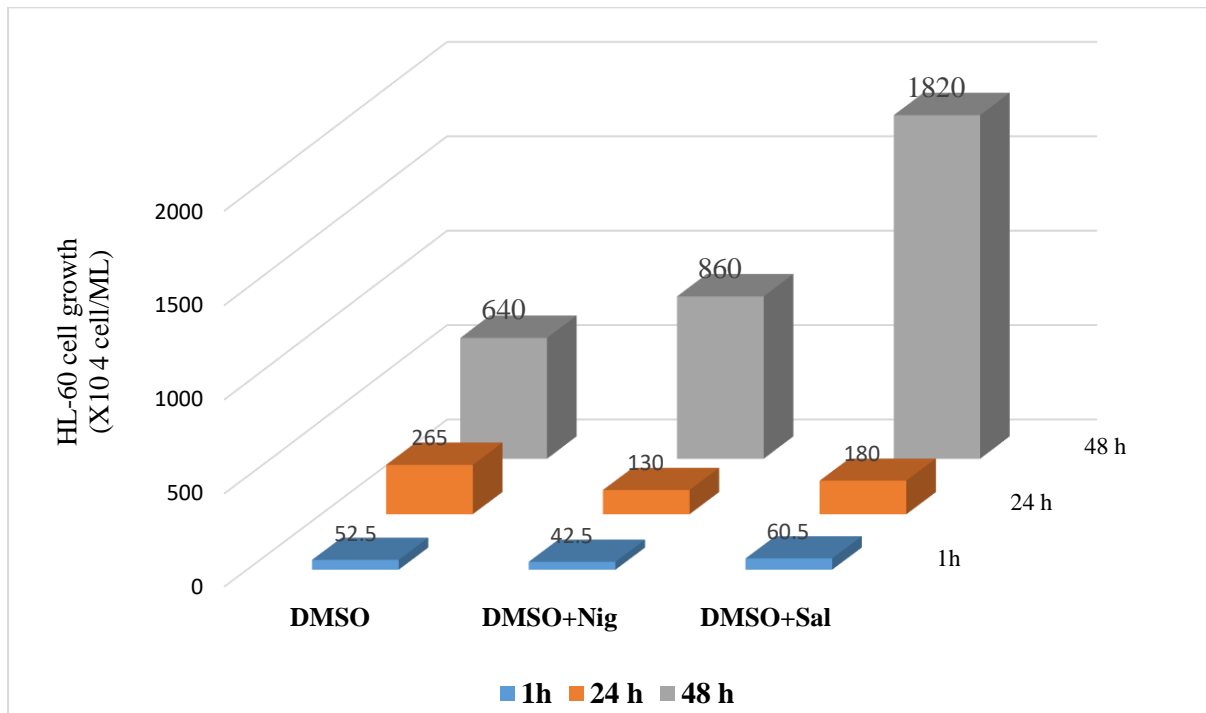

Figure 5

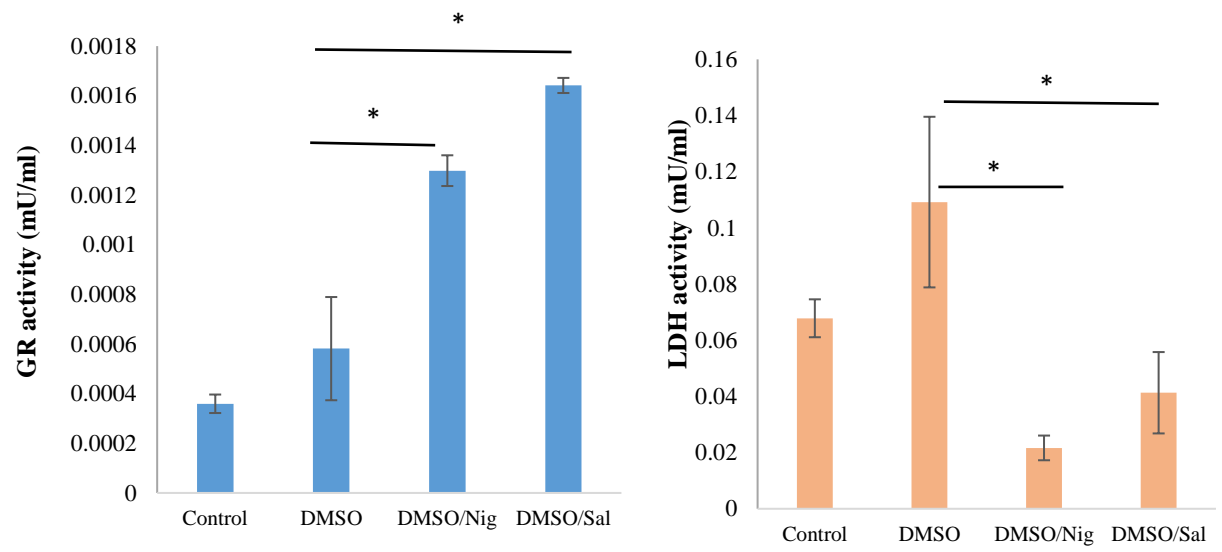

Figure 6.

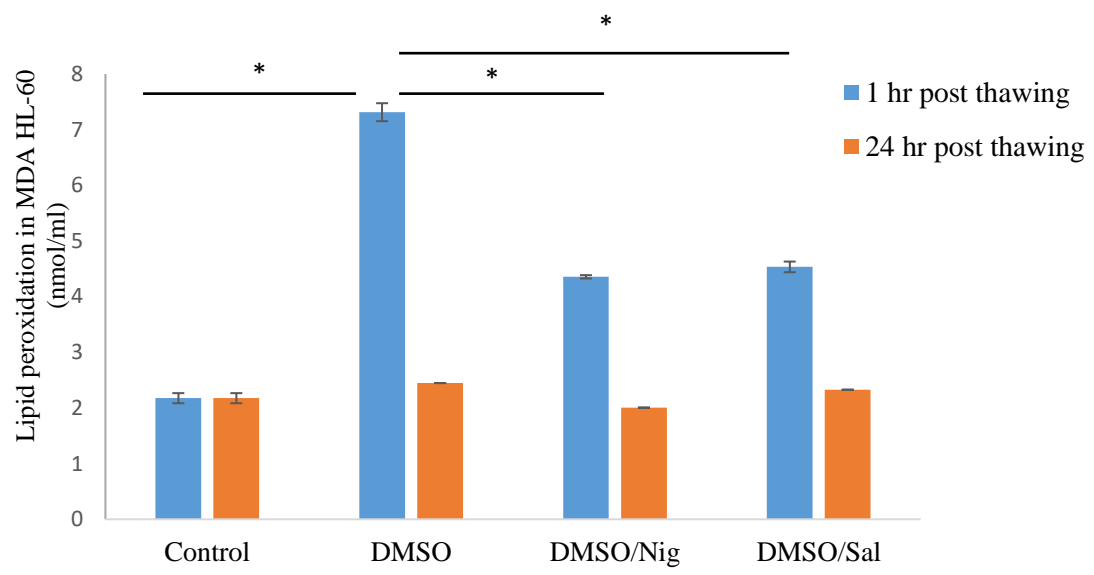

**Figure 7.**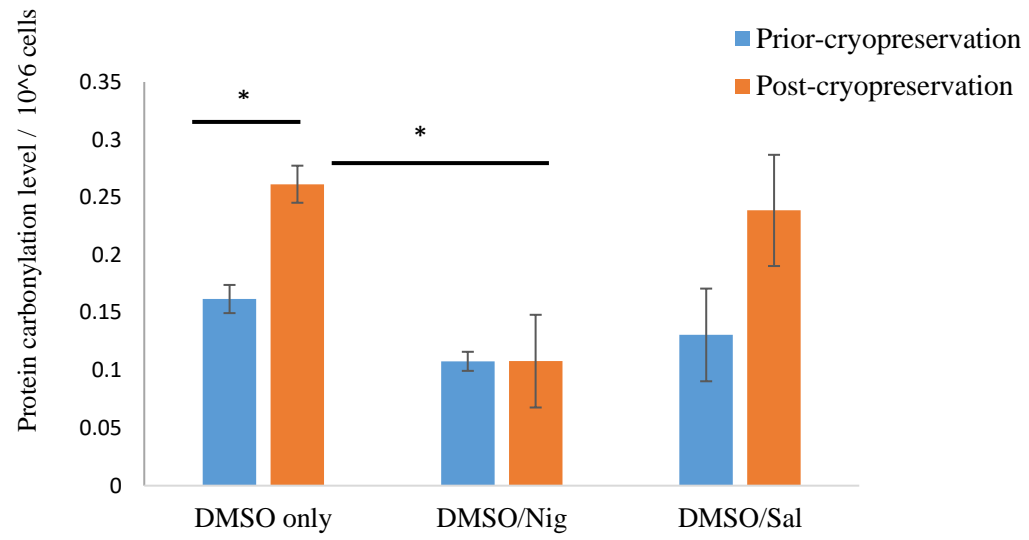



Click here to access/download  
**Supplementary Material**  
Supplement S1 pdf..pdf



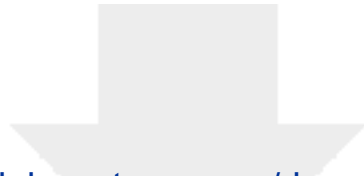

Click here to access/download  
**Supplementary Material**  
Table S1- Arm1.xls

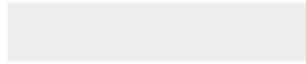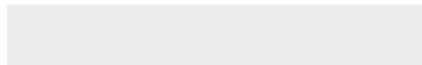





Click here to access/download  
**Supplementary Material**  
Table S2 Arm 2.xls





Click here to access/download  
**Supplementary Material**  
Table S3 Arm 3.xls



Supplement: giy154_giga-d-18-00064_revision_1.pdf [file giy154_giga-d-18-00064_revision_1.pdf]
