# Supplementary material for: BLINK: a package for the next level of genome-wide association studies with both individuals and markers in the millions
Source: PubMed Central journal article supplement (PMC6365300; doi:10.1093/gigascience/giy154), 2018-12-11

## Human Leukaemia cells (HL-60) proteomic and biological signatures underpinning cryo-damage are differentially modulated by novel cryo-additives.

--Manuscript Draft--

|                                                      |                                                                                                                                                                                                                                                                                                                                                                                                                                                                                                                                                                                                                                                                                                                                                                                                                                                                                                                                                                                                                                                                                                                                                                                                                                                                                                                                                                                                                                                                                                                                                                                                                                                                                                                                                                                                                                                                                                                                                                                                                                                                                                                                                                                                                                                                              |                            |
|------------------------------------------------------|------------------------------------------------------------------------------------------------------------------------------------------------------------------------------------------------------------------------------------------------------------------------------------------------------------------------------------------------------------------------------------------------------------------------------------------------------------------------------------------------------------------------------------------------------------------------------------------------------------------------------------------------------------------------------------------------------------------------------------------------------------------------------------------------------------------------------------------------------------------------------------------------------------------------------------------------------------------------------------------------------------------------------------------------------------------------------------------------------------------------------------------------------------------------------------------------------------------------------------------------------------------------------------------------------------------------------------------------------------------------------------------------------------------------------------------------------------------------------------------------------------------------------------------------------------------------------------------------------------------------------------------------------------------------------------------------------------------------------------------------------------------------------------------------------------------------------------------------------------------------------------------------------------------------------------------------------------------------------------------------------------------------------------------------------------------------------------------------------------------------------------------------------------------------------------------------------------------------------------------------------------------------------|----------------------------|
| <b>Manuscript Number:</b>                            | GIGA-D-18-00064R3                                                                                                                                                                                                                                                                                                                                                                                                                                                                                                                                                                                                                                                                                                                                                                                                                                                                                                                                                                                                                                                                                                                                                                                                                                                                                                                                                                                                                                                                                                                                                                                                                                                                                                                                                                                                                                                                                                                                                                                                                                                                                                                                                                                                                                                            |                            |
| <b>Full Title:</b>                                   | Human Leukaemia cells (HL-60) proteomic and biological signatures underpinning cryo-damage are differentially modulated by novel cryo-additives.                                                                                                                                                                                                                                                                                                                                                                                                                                                                                                                                                                                                                                                                                                                                                                                                                                                                                                                                                                                                                                                                                                                                                                                                                                                                                                                                                                                                                                                                                                                                                                                                                                                                                                                                                                                                                                                                                                                                                                                                                                                                                                                             |                            |
| <b>Article Type:</b>                                 | Research                                                                                                                                                                                                                                                                                                                                                                                                                                                                                                                                                                                                                                                                                                                                                                                                                                                                                                                                                                                                                                                                                                                                                                                                                                                                                                                                                                                                                                                                                                                                                                                                                                                                                                                                                                                                                                                                                                                                                                                                                                                                                                                                                                                                                                                                     |                            |
| <b>Funding Information:</b>                          | King Abdulaziz City for Science and Technology                                                                                                                                                                                                                                                                                                                                                                                                                                                                                                                                                                                                                                                                                                                                                                                                                                                                                                                                                                                                                                                                                                                                                                                                                                                                                                                                                                                                                                                                                                                                                                                                                                                                                                                                                                                                                                                                                                                                                                                                                                                                                                                                                                                                                               | Dr Nigel Slater            |
|                                                      | Fundação de Amparo à Pesquisa do Estado de São Paulo (2014/14881-1)                                                                                                                                                                                                                                                                                                                                                                                                                                                                                                                                                                                                                                                                                                                                                                                                                                                                                                                                                                                                                                                                                                                                                                                                                                                                                                                                                                                                                                                                                                                                                                                                                                                                                                                                                                                                                                                                                                                                                                                                                                                                                                                                                                                                          | Dr Daniel Martins-de-Souza |
|                                                      | Brazilian National Council for Scientific and Technological Development (460289/2014-4)                                                                                                                                                                                                                                                                                                                                                                                                                                                                                                                                                                                                                                                                                                                                                                                                                                                                                                                                                                                                                                                                                                                                                                                                                                                                                                                                                                                                                                                                                                                                                                                                                                                                                                                                                                                                                                                                                                                                                                                                                                                                                                                                                                                      | Dr Daniel Martins-de-Souza |
| <b>Abstract:</b>                                     | <p><b>Abstract</b></p> <p><b>Background:</b> Cryopreservation is a routinely used methodology for prolonged storage of viable cells. The use of cryo-protective agents (CPAs) such as dimethylsulfoxide (DMSO), glycerol or trehalose is paramount to reduce cellular cryo-injury but their effectiveness is still limited. The current study focuses on establishing and modulating the proteomic and the corresponding biological profiles associated with the cryo-injury of human leukaemia (HL-60) cells cryopreserved in DMSO alone or DMSO +/- novel CPAs [e.g. nigerose (Nig) or salidroside (Sal)].</p> <p><b>Findings:</b> To reduce cryo-damage, HL-60 cells were cultured prior and post cryopreservation in RPMI-1640 media +/- Nig or Sal. Shotgun proteomic analysis showed significant alterations in the levels of proteins in cells cryopreserved in Nig or Sal compared to DMSO. Nig mostly affected cellular metabolism and energy pathways, whereas Sal increased the levels of proteins associated with DNA repair/duplication, RNA transcription and cell proliferation. Validation testing showed that the proteome profile associated with Sal was correlated with a 2.8 fold increase in cell proliferative rate. At the functional level, both Nig and Sal increased glutathione reductase (0.0012±6.19E-05 and 0.0016±3.04E-05 mU/mL, respectively) compared to DMSO controls (0.0003±3.7E-05 mU/mL) and reduced cytotoxicity by decreasing lactate dehydrogenase activities (from -2.5 to -4.75 fold) and lipid oxidation (-1.6 fold). In contrast, only Nig attenuated protein carbonylation or oxidation.</p> <p><b>Conclusions:</b> We have identified key molecules and corresponding functional pathways underpinning the effect of cryopreservation (+/- CPAs) of HL-60 cells. We also validated the proteomic findings by identifying the corresponding biological profiles associated with promoting an anti-oxidative environment post cryopreservation. Nig or Sal in comparison to DMSO showed differential or additive effects in regards to reducing cryo-injury and enhancing cell survival/proliferation post thaw. These results can provide useful insight to cryo-damage and the design of enhanced cryomeia formulation.</p> |                            |
| <b>Corresponding Author:</b>                         | Hassan Rahmoune, Ph. D.<br>University of Cambridge<br>UNITED KINGDOM                                                                                                                                                                                                                                                                                                                                                                                                                                                                                                                                                                                                                                                                                                                                                                                                                                                                                                                                                                                                                                                                                                                                                                                                                                                                                                                                                                                                                                                                                                                                                                                                                                                                                                                                                                                                                                                                                                                                                                                                                                                                                                                                                                                                         |                            |
| <b>Corresponding Author Secondary Information:</b>   |                                                                                                                                                                                                                                                                                                                                                                                                                                                                                                                                                                                                                                                                                                                                                                                                                                                                                                                                                                                                                                                                                                                                                                                                                                                                                                                                                                                                                                                                                                                                                                                                                                                                                                                                                                                                                                                                                                                                                                                                                                                                                                                                                                                                                                                                              |                            |
| <b>Corresponding Author's Institution:</b>           | University of Cambridge                                                                                                                                                                                                                                                                                                                                                                                                                                                                                                                                                                                                                                                                                                                                                                                                                                                                                                                                                                                                                                                                                                                                                                                                                                                                                                                                                                                                                                                                                                                                                                                                                                                                                                                                                                                                                                                                                                                                                                                                                                                                                                                                                                                                                                                      |                            |
| <b>Corresponding Author's Secondary Institution:</b> |                                                                                                                                                                                                                                                                                                                                                                                                                                                                                                                                                                                                                                                                                                                                                                                                                                                                                                                                                                                                                                                                                                                                                                                                                                                                                                                                                                                                                                                                                                                                                                                                                                                                                                                                                                                                                                                                                                                                                                                                                                                                                                                                                                                                                                                                              |                            |
| <b>First Author:</b>                                 | Hassan Rahmoune, Ph. D.                                                                                                                                                                                                                                                                                                                                                                                                                                                                                                                                                                                                                                                                                                                                                                                                                                                                                                                                                                                                                                                                                                                                                                                                                                                                                                                                                                                                                                                                                                                                                                                                                                                                                                                                                                                                                                                                                                                                                                                                                                                                                                                                                                                                                                                      |                            |
| <b>First Author Secondary Information:</b>           |                                                                                                                                                                                                                                                                                                                                                                                                                                                                                                                                                                                                                                                                                                                                                                                                                                                                                                                                                                                                                                                                                                                                                                                                                                                                                                                                                                                                                                                                                                                                                                                                                                                                                                                                                                                                                                                                                                                                                                                                                                                                                                                                                                                                                                                                              |                            |
| <b>Order of Authors:</b>                             | Hassan Rahmoune, Ph. D.                                                                                                                                                                                                                                                                                                                                                                                                                                                                                                                                                                                                                                                                                                                                                                                                                                                                                                                                                                                                                                                                                                                                                                                                                                                                                                                                                                                                                                                                                                                                                                                                                                                                                                                                                                                                                                                                                                                                                                                                                                                                                                                                                                                                                                                      |                            |

|                                                                                                                                                                                                                                                                                                                                                                                                                                                                                                                                     |                                                                                                                                                                              |
|-------------------------------------------------------------------------------------------------------------------------------------------------------------------------------------------------------------------------------------------------------------------------------------------------------------------------------------------------------------------------------------------------------------------------------------------------------------------------------------------------------------------------------------|------------------------------------------------------------------------------------------------------------------------------------------------------------------------------|
|                                                                                                                                                                                                                                                                                                                                                                                                                                                                                                                                     | Noha Al-Otaibi                                                                                                                                                               |
|                                                                                                                                                                                                                                                                                                                                                                                                                                                                                                                                     | Juliana Cassoli                                                                                                                                                              |
|                                                                                                                                                                                                                                                                                                                                                                                                                                                                                                                                     | Daniel Martins-de-Souza                                                                                                                                                      |
|                                                                                                                                                                                                                                                                                                                                                                                                                                                                                                                                     | Nigel Slater                                                                                                                                                                 |
| <b>Order of Authors Secondary Information:</b>                                                                                                                                                                                                                                                                                                                                                                                                                                                                                      |                                                                                                                                                                              |
| <b>Response to Reviewers:</b>                                                                                                                                                                                                                                                                                                                                                                                                                                                                                                       | <p>Dear Sir/Madam</p> <p>We have made the necessary corrections as suggested by Dr Scott Edmunds - See Version 26-11-2018.</p> <p>Kind Regards</p> <p>Dr Hassan Rahmoune</p> |
| <b>Additional Information:</b>                                                                                                                                                                                                                                                                                                                                                                                                                                                                                                      |                                                                                                                                                                              |
| <b>Question</b>                                                                                                                                                                                                                                                                                                                                                                                                                                                                                                                     | <b>Response</b>                                                                                                                                                              |
| Are you submitting this manuscript to a special series or article collection?                                                                                                                                                                                                                                                                                                                                                                                                                                                       | No                                                                                                                                                                           |
| <p><b>Experimental design and statistics</b></p> <p>Full details of the experimental design and statistical methods used should be given in the Methods section, as detailed in our <a href="#">Minimum Standards Reporting Checklist</a>. Information essential to interpreting the data presented should be made available in the figure legends.</p> <p>Have you included all the information requested in your manuscript?</p>                                                                                                  | Yes                                                                                                                                                                          |
| <p><b>Resources</b></p> <p>A description of all resources used, including antibodies, cell lines, animals and software tools, with enough information to allow them to be uniquely identified, should be included in the Methods section. Authors are strongly encouraged to cite <a href="#">Research Resource Identifiers</a> (RRIDs) for antibodies, model organisms and tools, where possible.</p> <p>Have you included the information requested as detailed in our <a href="#">Minimum Standards Reporting Checklist</a>?</p> | Yes                                                                                                                                                                          |

|                                                                                                                                                                                                                                                                                                                                                                                                                                                                                                                                                         |            |
|---------------------------------------------------------------------------------------------------------------------------------------------------------------------------------------------------------------------------------------------------------------------------------------------------------------------------------------------------------------------------------------------------------------------------------------------------------------------------------------------------------------------------------------------------------|------------|
| <p><b>Availability of data and materials</b></p> <p>All datasets and code on which the conclusions of the paper rely must be either included in your submission or deposited in <a href="#">publicly available repositories</a> (where available and ethically appropriate), referencing such data using a unique identifier in the references and in the “Availability of Data and Materials” section of your manuscript.</p> <p>Have you have met the above requirement as detailed in our <a href="#">Minimum Standards Reporting Checklist</a>?</p> | <p>Yes</p> |
|---------------------------------------------------------------------------------------------------------------------------------------------------------------------------------------------------------------------------------------------------------------------------------------------------------------------------------------------------------------------------------------------------------------------------------------------------------------------------------------------------------------------------------------------------------|------------|

[Click here to view linked References](#)

1

1 **Human Leukaemia cells (HL-60) proteomic and biological signatures underpinning**

2 **cryo-damage are differentially modulated by novel cryo-additives**

3 Noha A. S. Al-Otaibi<sup>1,2</sup>, Juliana S. Cassoli<sup>3</sup>, Daniel Martins-de-Souza<sup>3</sup>, Nigel K. H. Slater<sup>1</sup>, Hassan

4 Rahmoune<sup>1 #</sup>

5

6 (1) Department of Chemical Engineering & Biotechnology, University of Cambridge, Philippa

7 Fawcett Drive. Cambridge CB3 0AS, United Kingdom.

8 (2) King Abdulaziz City for Science and Technology Kingdom of Saudi Arabia P.O Box 6086,

9 Riyadh 11442, Saudi Arabia.

10 (3) Laboratory of Neuroproteomics, Department of Biochemistry and Tissue Biology Institute of

11 Biology, University of Campinas (UNICAMP), Campinas, SP, Brazil.

12

13 # Address correspondence to Hassan Rahmoune, Ph. D., (1). Email: [hr228@cam.ac.uk](mailto:hr228@cam.ac.uk)

14

15 E-mail addresses (in the order of appearance): [naa37@cam.ac.uk](mailto:naa37@cam.ac.uk) (ORCID identifier NA),

16 [jscassoli@gmail.com](mailto:jscassoli@gmail.com) (ORCID identifier 0000-0002-2174-6309), [dmsouza@unicamp.br](mailto:dmsouza@unicamp.br) (ORCID

17 identifier 0000-0003-3595-5846), [nkhs2@cam.ac.uk](mailto:nkhs2@cam.ac.uk) (ORCID identifier 0000-0002-0207-9440),

18 [hr228@cam.ac.uk](mailto:hr228@cam.ac.uk) (ORCID identifier 0000-0002-4889-0992)

19

20 **Running Title:** Modulating molecular profiles underpinning HL-60 cryo-damage

21

22

23

24

25 **Abstract**26 **Background:** Cryopreservation is a routinely used methodology for prolonged storage of viable cells.

27 The use of cryo-protective agents (CPAs) such as dimethylsulfoxide (DMSO), glycerol or trehalose is

28 paramount to reduce cellular cryo-injury but their effectiveness is still limited. The current study

29 focuses on establishing and modulating the proteomic and the corresponding biological profiles

30 associated with the cryo-injury of human leukaemia (HL-60) cells cryopreserved in DMSO alone or

31 DMSO +/- novel CPAs [e.g. nigerose (Nig) or salidroside (Sal)].

32 **Findings:** To reduce cryo-damage, HL-60 cells were cultured prior and post cryopreservation in

33 RPMI-1640 media +/- Nig or Sal. Shotgun proteomic analysis showed significant alterations in the

34 levels of proteins in cells cryopreserved in Nig or Sal compared to DMSO. Nig mostly affected

35 cellular metabolism and energy pathways, whereas Sal increased the levels of proteins associated with

36 DNA repair/duplication, RNA transcription and cell proliferation. Validation testing showed that the

37 proteome profile associated with Sal was correlated with a 2.8 fold increase in cell proliferative rate.

38 At the functional level, both Nig and Sal increased glutathione reductase ( $0.0012 \pm 6.19E-05$  and39  $0.0016 \pm 3.04E-05$  mU/mL, respectively) compared to DMSO controls ( $0.0003 \pm 3.7E-05$  mU/mL) and

40 reduced cytotoxicity by decreasing lactate dehydrogenase activities (from -2.5 to -4.75 fold) and lipid

41 oxidation (-1.6 fold). In contrast, only Nig attenuated protein carbonylation or oxidation.

42 **Conclusions:** We have identified key molecules and corresponding functional pathways underpinning

43 the effect of cryopreservation (+/- CPAs) of HL-60 cells. We also validated the proteomic findings by

44 identifying the corresponding biological profiles associated with promoting an anti-oxidative

45 environment post cryopreservation. Nig or Sal in comparison to DMSO showed differential or

46 additive effects in regards to reducing cryo-injury and enhancing cell survival/proliferation post thaw.

47 These results can provide useful insight to cryo-damage and the design of enhanced cryomedia

48 formulation.

49

50 **Keywords:** Cryopreservation, Oxidative stress, Dimethylsulfoxide, Nigerose, Salidroside.

51 **Background**

52 Cryopreservation of viable cells and tissues is a powerful approach to ensure cell longevity and integrity  
53 and facilitate cell/tissue engineering therapy [1]. Cell-based therapy is a rapidly emerging industry and  
54 is estimated to be worth around \$5 billion in the USA alone [2]. Despite well-established  
55 cryopreservation protocols, cells remain subject to a high level of cryo-damage leading to compromised  
56 cell function and necrosis [3]. The cellular damage is generally seen as lipid and protein oxidation,  
57 which can severely affect cell stability [4] and ability to proliferate [5]. Thus, reducing the impact of  
58 cryo-damage is paramount to enhance cell recovery rate post freeze/thaw cycles.

59  
60 Despite their reported toxic properties, DMSO and glycerol are the most commonly used cryo-  
61 protective agents (CPAs) to reduce cryo-injury and increase cell viability [5]. Other CPAs such as  
62 trehalose have been used for their cryo-protective properties against intracellular ice crystal formation  
63 [6]. However, the protective effect of these compounds is still limited [7] with low cell viability and  
64 recovery rates post cryopreservation [8]. The use of CPAs can also lead to production of reactive oxygen  
65 species, whereby cells are subjected to oxidative damage during freeze-thaw cycles [9]. Moreover, the  
66 effectiveness of intracellular or auto anti-oxidative response to cryo-insult is limited as cell survival is  
67 reduced [10]. Attempts to promote cellular anti-oxidative status have been reported before and these  
68 showed an improved cell survival rate [11]. For example, the use of arabidopsis thaliana containing  
69 high levels of ascorbic acid increased intracellular catalase activity leading to a higher cell survival rate  
70 post thaw [11].

71  
72 The majority of studies on cryopreservation have focused on either fertility [12-14] or more recently  
73 on stem cells [5]. The potential clinical use of Human Mesenchymal Stem Cells in regenerative  
74 medicine and/or cell-based therapy has led to a sharp focus on enhancing the cryopreservation process  
75 of these cells. Martín-Ibáñez et al have succinctly summarised the current use of CPAs as additive (e.  
76 g. DMSO/ Glycerol +/- cryo-additive agents) to slightly improve the cryopreservation of human

1  
2  
3  
4  
5  
6  
7  
8  
9  
10  
11  
12  
13  
14  
15  
16  
17  
18  
19  
20  
21  
22  
23  
24  
25  
26  
27  
28  
29  
30  
31  
32  
33  
34  
35  
36  
37  
38  
39  
40  
41  
42  
43  
44  
45  
46  
47  
48  
49  
50  
51  
52  
53  
54  
55  
56  
57  
58  
59  
60  
61  
62  
63  
64  
65

77 Pluripotent stem cells [15]. More recently, Haritz Gurruchaga et al have demonstrated that the  
78 combination of CPAs such as DMSO/Sucrose has significantly improved the quality of Human  
79 Mesenchymal Stem Cells post cryopreservation [16]. Tissue cryopreservation of the umbilical cord  
80 has also been attempted which is crucial to the future success of regenerative medicine [17]. Although  
81 limited attempts have been carried out to improve cryopreservation of cell lines (e. g. Hepatocytes)  
82 [18]. Moreover, the bulk of empirical studies attempting to decipher molecular profiles associated  
83 with cryo-injury have been conducted mainly on fertility-related specimens [19, 20], plant cells [21]  
84 or stem cells [22]. Likewise, attempts to modify cryo-proteomic profiles using CPAs or DMSO +/-  
85 antifreeze have been made mainly in the field of reproductive medicine [23, 24]. In contrast, only a  
86 limited number of molecular/functional studies have been conducted on nucleated-human cell lines to  
87 decipher and modulate biological pathways underpinning cryo-damage.

88 Here, we have used human leukemia (HL-60) cells as a nucleated cellular model to establish the  
89 biomolecular profiles associated with cryo-damage in the presence of DMSO alone or with the addition  
90 of salidroside (Sal) or the novel CPA nigerose (Nig) [4]. The addition of Sal with the tyrosol glucoside,  
91 as the active component of the herb Rhodiolarosea, was used previously to prevent high altitude  
92 sickness [25]. Sal has also been found to act as antioxidant against hydrogen peroxide-induced apoptosis  
93 of human red blood cells [26] and as a CPA for red blood cell cryopreservation [4]. However, this is  
94 the first investigation to test the potential cryoprotective properties of Nig. Nig is an un-fermentable  
95 sugar obtained by partial hydrolysis of nigeran and is polyol extracted from fermentation of  
96 microorganisms such as black mold or dextrans [27] as well as honey [28]. A hypothesis driven  
97 approach is clearly needed here to elucidate and modify cell-specific molecular and biological pathways  
98 associated with cyo-injury. Here we have employed a shotgun proteomics approach to profile and  
99 modulate the molecular pathways underpinning human nucleated cell cryo-damage. The present study  
100 also offers the opportunity to enhance future cryomedia formulation, minimize losses of cell viability  
101 and maximize cell recovery post freeze-thaw cycle.

## 102 103 **Data Description**

104 For proteomic analysis samples were analysed using hi-resolution mass spectrometry on a Synapt G2-  
105 Si HDMS mass spectrometer (Waters). Data processing, database searches and label free quantification  
106 were performed using Progenesis QI for Proteomics. The mass spectrometry raw data files, database  
107 search and quantification results have been deposited and can be accessed via ProteomeXchange [29]  
108 with identifier PXD006998.. The resulting HL-60 proteome profiles has led us to investigate the  
109 corresponding biological activities (e. g. enzymatic, protein/ lipid oxidation and cell proliferation  
110 assays) post cryopreservation.

111

## 112 **Analyses**

113 Proteins found to present at significantly different levels in HL-60 cells cryopreserved in DMSO  
114 alone (n=5 replicates), DMSO+Nig (n=5 replicates) or DMSO+Sal (n=5 replicates) were classified  
115 according to their biological and functional pathways. The Uniprot accession codes of differentially  
116 expressed proteins or genes were mapped to Gene Ontology Annotation using software linked to  
117 Funrich database. ([http:// www.funrich.org](http://www.funrich.org)) [29]. The number of significantly changing proteins  
118 (P<0.05) that are expressed in HL-60 cryopreserved in DMSO, DMSO + Nig or DMSO + Sal are  
119 illustrated in a Venn diagram (**Figure 2A**). Thus, the overlapping as well as the uniquely expressed  
120 proteins (e. g. up/down-regulated) between the different arms of the study (Figure 1) are shown in  
121 **Figure 2A**. ().

122

## 123 **Proteomic Analyses**

124 ..

125 Label-free quantitative shotgun proteomic analysis was used to identify HL-60 cell proteins found at  
126 different levels post cryopreservation in DMSO alone, DMSO +Nig or DMSO + Sal (n= 5  
127 replicates/arm). In this study, cryopreservation has significantly induced changes in the abundances of  
128 many proteins of HL-60 cryopreserved in DMSO +Nig group 1140 proteins (**Table S2**), DMSO + Sal  
129 group 1032 proteins (**Table S 3**) and with only 886 proteins found changing for HL-60 cryopreserved



130 DMSO alone (**Table S1**). Some of the biologically relevant proteins expressed by HL-60 (i. e.  
1 identified, quantified and differentially expressed) are summarised in **Table 1**.

132

133

134

135 Using the Funrich database, the *In silico* functional analysis of the proteomes has revealed the  
136 following:

137 1) The effect of cryopreservation showed a higher number of differentially expressed 1,140 proteins  
138 (with  $P < 0.05$ ) for DMSO +Nig (**Figure 2A**) and DMSO + Sal (1,032 proteins; **Figure 2A**), with only  
139 886 proteins found for DMSO alone (**Figure 2A**). In addition, the Venn diagram analysis (**Figure 2A**)  
140 has shown that the highest number of uniquely identified proteins was found in DMSO + Sal (n=231).  
141 Cells cryopreserved DMSO + Nig showed 224 proteins that are specifically expressed in the presence  
142 of Nig while the lowest number (n=158) of uniquely expressed proteins (not found in DMSO + Sal or  
143 Nig treated cells) is in HL-60 cells cryopreserved in DMSO.

144 2) The nature of biological pathways associated with cryo-damage of HL-60 cryopreserved in DMSO  
145 alone and those which were differentially modulated by the CPAs post thaw. A proportionately high  
146 number of proteins (21.05%) engaged in nucleotide and nucleobase regulation or DNA binding were  
147 identified in HL-60 cells cryopreserved in DMSO + Sal. In contrast, the DMSO + Nig arm showed the  
148 highest proportion of changes (16.8%) in proteins associated with energy pathways and protein  
149 metabolism (**Figure 3A**). Supplementing DMSO with Nig or Sal as CPAs also led to an increased level  
150 of proteins with oxidoreductase activities, especially in the case of Nig (**Figure 3B**). The level of  
151 proteins linked to cell maintenance was the highest in HL-60 cells cryopreserved in DMSO alone  
152 (12.5%) when compared to DMSO +Nig (8%) and DMSO + Sal (6.4%).

153

154 3) The percentage of recognised DNA binding proteins were estimated at 8.09% for cells  
155 cryopreserved in DMSO + Sal while this did not exceed 2% in cells cryopreserved in DMSO +Nig  
156 and DMSO alone (**Figure 3B**). HL-60 protease activity-associated proteins were estimated at 4.4% in  
157 DMSO +Nig, 3.1% in DMSO alone, while only reaching 2.02% in DMSO + Sal (**Figure 3B**). With

158 regards to cryo-stress, heat shock proteins were differentially expressed in HL-60 cells cryopreserved  
 159 in DMSO + Sal (1.2%) and DMSO alone (0.6%), whereas these proteins were not detected in cells  
 160 cryopreserved in the presence of Nig. The proteome profile reflecting the effect of freeze/thaw cycle  
 161 on HL-60 cells cryopreserved in DMSO alone and DMSO + Nig or Sal are summarised in **Table 1**.

162

163 *Oxido-redox functions (Table 1)*

164 Reduction in HL-60 cryo-oxidation was shown by an increased level of glutathione reductase and  
 165 superoxide dismutase [Cu-Zn] by 3.2 ad 1.4 fold, respectively, in DMSO alone (**Table 1**). However, no  
 166 significant change was detected in the levels of either of these markers for cells preserved in the  
 167 presence of Nig or Sal. In contrast, the levels of thioredoxin reductase-1 were increased up to 35 fold  
 168 when Nig was added and by 15 fold with the addition of Sal. A similar pattern was seen with the NADH-  
 169 ubiquinone oxidoreductase 75 kDa subunit. The level of pro-oxidative enzymes were all reduced in the  
 170 presence of CPAs such as peroxiredoxin (not detected in DMSO, downregulated by 2.0-fold in DMSO  
 171 + Nig and by 3.5-fold in DMSO + Sal), glutathione S-transferase Kappa-1 (decreased by 8-fold in  
 172 DMSO, decreased 13.6-fold in DMSO + Nig and decreased 3.5-fold in DMSO +Sal) and thioredoxin-  
 173 dependent peroxide reductase [decreased3.0-fold in DMSO, decreased 5.2 fold in DMSO + Nig and  
 174 decreased 8.8-fold in DMSO + Sal). Very long-chain specific acyl-CoA dehydrogenase (involved in  
 175 fatty acid  $\beta$ -oxidation) showed a 4-fold decreased level in HL-60 cells cryopreserved in DMSO + Nig  
 176 and a 5-fold decrease in DMSO + Sal compared to the levels in cells cryopreserved in DMSO alone. A  
 177 similar anti-oxidative pattern was observed in the presence of CPAs with increased levels of acyl-  
 178 coenzyme A oxidase (16.8 fold in DMSO + Nig and 42.7-fold in DMSO + Sal) and carbonyl oxidase  
 179 (5.5 fold in the presence of DMSO + Sal).

180 A differential response to cryo-stress was identified when Nig or Sal were added to media prior to and  
 181 post cryopreservation of HL-60 cells. For example, the stress-related protein Hsp 70-binding protein 1  
 182 was increased 14.4-fold in HL-60 cells cryopreserved in DMSO alone but its level decreased by 71-  
 183 and 77-folds in the presence of Nig or Sal respectively. In contrast, cytosolic stress response proteins  
 184 such as the heat shock 70 kDa protein 4 was not detected in DMSO +/- Nig and was increased by 2.3-

185 fold in DMSO + Sal. Finally, microsomal Hsp 70 protein-13 was not detected in HL-60 cells  
 186 cryopreserved in DMSO +/- Sal while this same protein was upregulated by 15.8-fold in the presence  
 187 of DMSO + Nig.

188

189 **Nuclear and cellular functions (Table 1)**

190 Twenty-four hours post thaw, incubation of HL-60 cell in Sal led to a marked elevation in its nuclear  
 191 proteins as shown in **Table 1**. In the presence of Sal, the levels of proteins associated with DNA repair  
 192 were relatively upregulated such as DNA excision repair protein ERCC-6-like (- 8.8-fold in Sal, while  
 193 diminishing by 13.8 fold in the presence of DMSO + Nig and by 14.4-fold in DMSO alone), mini-  
 194 chromosome maintenance complex-binding protein (increased by 71-fold in DMSO + Sal, 11-fold in  
 195 DMSO +Nig and not detected in DMSO alone). Sal also enhanced the levels of proteins involved in  
 196 transcriptional regulation such as transcription factor TFIIB component B protein (increased by 11-  
 197 fold in DMSO + Sal, 8-fold in DMSO + Nig, and by 2-fold in DMSO alone).

198 In the presence of CPAs, the significantly altered levels of proteins associated with nuclear activities  
 199 were reflected by the changes in proteins associated with cell growth and cytosolic functions. For  
 200 example, the presence of Sal and Nig doubled the fold change of cyclin-G-associated kinase from a 4-  
 201 fold in DMSO alone, up to 8 or 9-fold increment in Nig and Sal, respectively. TBC1 domain family  
 202 member 2A, known to be involved in the regulation of GTPase activities and vesicle fusion, was only  
 203 augmented by 10.5 fold post thaw for HL-60 cryopreserved in DMSO alone while it was further  
 204 enhanced in the presence of Nig by 11.2-fold and up to 39-fold increase in Sal. The levels of cytoskeletal  
 205 proteins were also boosted by the CPAs such as ankyrin-2, microtubules-associated protein and  
 206 echinoderm microtubule-associated protein-like 1) which are known to be associated with cell shape.  
 207 Functions such as cell re-organisation and division were also increased in the presence of Nig and Sal  
 208 compared to DMSO alone (Table1).

209

210 **HL-60 cell proliferation post thaw (Table 1)**

211 The number of HL-60 cells 24 h post thaw was estimated at  $265 \times 10^4$ ,  $130 \times 10^4$  and  $180 \times 10^4$  cells/mL  
 212 for DMSO alone, DMSO + Nig and DMSO + Sal respectively (**Figure 4**). At 48 h, Sal increased the  
 213 proliferative rate by 2.84-fold compared to cells cryopreserved in DMSO alone and this was 1.3-fold  
 214 for DMSO + Nig compared to cells cryopreserved in DMSO alone ( $640 \times 10^4$  cells/mL). The direct  
 215 comparison between the effect of Nig and Sal on cell growth rate at 48 h showed that the number of  
 216 HL-60 cells in the presence Sal was at  $1820 \times 10^4$  cells/mL while this only reached  $860 \times 10^4$  cells/mL  
 217 in the presence of Nig. Such an increase in the HL-60 cell proliferative rate post thaw in the presence  
 218 of Sal was paralleled by the increase in the protein levels of cyclin-G-associated kinase (9.8-fold)  
 219 (**Table 1**). Finally, post thaw HL-60 cells were immediately centrifuged, washed three times with  
 220 culture media and the resulting changes in cell viability during the recovery period up to 48 were  
 221 negligible (<2%).

222

#### 223 **Biological profiles of HL-60 cryopreserved in DMSO +/- Nig or Sal**

224 HL-60 cell intracellular glutathione reductase (GR) activity was measured [n=5 replicates] prior to  
 225 freezing and 24 h post thaw. GR activity was significantly increased in all cases. The presence of CPAs  
 226 in the media significantly boosted GR activity from 0.0003 mU/mL prior to cryopreservation to 0.0005  
 227 mU/mL in the presence of DMSO alone. The addition of Nig boosted GR activity post thaw even further  
 228 reaching  $0.0013 \pm 0.00006$  mU/mL. Sal had the biggest effect on HL-60 cell GR activity with a reading  
 229 of 0.0016 mU/mL (i.e. 3 times more increased compared to HL-60 cells cryopreserved in the standard  
 230 DMSO cryomedia). HL-60 cell intracellular Lactate dehydrogenase (LDH) activities were also  
 231 measured prior to freezing and 24 h post thaw [n=5 replicates]. Adding Sal to the culture or cryomedia  
 232 lowered LDH readouts from  $0.1 \pm 0.03$  mU/mL in DMSO alone to  $0.04 \pm 0.01$  mU/mL in DMSO + Sal.  
 233 Moreover, the addition of Nig had the biggest effect on lowering LDH activity by bringing this to  
 234  $0.02 \pm 0.044$  mU/mL (3 times lower than prior to cryopreservation, 5 times less than DMSO alone and  
 235 2 time less than DMSO + Sal).

236

237 Oxidation assays were conducted to investigate Nig and Sal cryo-protective properties against HL-60  
238 cells lipid (e. g. lipid peroxidation) and protein (e. g. Carbonylation) oxidation. HL-60 lipid  
239 peroxidation level was measured in triplicate prior to freezing, and 1 h and 24 h post thaw in the presence  
240 and absence of Nig or Sal. Measurement of MDA levels 1 h post thaw showed a significant increase in  
241 lipid oxidation with HL-60 cells cryopreserved in DMSO alone reaching an level of  $7.31 \pm 0.16$  nmol/mL  
242 (**Figure 5**). In contrast, this was approximately 40% lower in the presence of Nig ( $4.35 \pm 0.02$  nmol/mL)  
243 or Sal ( $4.53 \pm 0.09$  nmol/mL). In the recovery phase (e.g. 24 h post thaw), HL-60 cell lipid peroxidation  
244 levels reached control levels (e.g. prior to cryopreservation  $\sim 2.1$  nmol/mL). One day post thaw, lipid  
245 oxidation levels for HL-60 cells cryopreserved in DMSO +/- Nig or Sal reversed back to its prior  
246 cryopreservation level (**Figure 5**).

247  
248 As an indicator of oxidative stress, protein carbonylation assessment is widely used to reflect a major  
249 form of protein oxidation. Carbonylation assays were performed to assess the effect of CPAs on  
250 protein oxidation level post thaw. The results showed that protein carbonylation level for HL-60 cells  
251 cryopreserved in DMSO + Nig was kept at the level prior to freezing the cells and averaged  
252  $0.107 \pm 0.007$  nmol/mL (**Figure 6**) while Sal had no significant effect on protein oxidation level ( $\sim$   
253  $0.23 \pm 0.048$  nmol/mL). In the absence of cryo-additives, HL-60 cell levels of protein  
254 carbonylation/oxidation post freeze-thaw in DMSO alone were approximately  $0.26 \pm 0.016$  nmol/mL  
255 (**Figure 7**). Finally, Nig at 300  $\mu$ M showed an anti-oxidative effect by reducing non-cryopreserved  
256 HL-60 proteins carbonylation levels from 0.16 nmol/mL to 0.1 nmol/mL for cells growing in RPMI +  
257 300  $\mu$ M Nig, while this was only reduced to 0.13 nmol/mL in the presence of 200  $\mu$ M Sal (**Figure 7**).

## 259 Discussion

260 This is the first study aimed at establishing the proteomic and biological responses of HL-60 cells  
261 subjected to storage freezing in the presence of DMSO +/- novel CPAs. Many of the proteomic findings  
262 were validated by carrying out functional/biological assays targeting the main proteomic pathways  
263 identified. The major issue with the most commonly used permeating CPAs such as DMSO is their

264 cytotoxicity [30], leading to low cell recovery. In the present study, HL-60 cells were incubated with  
1 Nig or Sal prior to and during cryopreservation. We subsequently identified differential proteome  
2 265 profiles associated with HL-60 cryopreservation in DMSO +/- CPAs. For example the highest total  
3  
4 266 number of differentially expressed proteins was found in cells cryopreserved in a combination of DMSO  
5  
6 267 and Nig (37%), followed by 34% in DMSO and Sal, compared to only 29% for cells cryopreserved in  
7  
8 268 DMSO alone. This suggests that these two CPAs helped to preserve cellular proteins. The bulk of  
9  
10 269 previous proteome profiling studies investigating nucleated cell lines were either performed on the cells  
11  
12 270 without cryopreservation [31], assessing pharmacological agent effects on specific cells [32] or  
13  
14 271 comparison of cellular proteome profiles of healthy versus diseased patients [33].  
15  
16  
17  
18  
19  
20  
21

272  
273  
274 The current finding demonstrated that the HL-60 cell line cryopreserved in DMSO alone exhibited an  
275 increased level of proteins associated with oxidative stress (e. g. superoxide dismutase, acyl coA  
276 oxidase or Hsp 70-binding protein 1) was interesting as these were mostly reversed in the presence of  
277 Nig or Sal. Furthermore, protein deglycase, a protein known to play an important role as an oxidation  
278 sensor [34], was increased in the presence of DMSO + Sal only, suggesting the promotion of an anti-  
279 oxidative environment. These findings are in line with reports of putative stress factors related to  
280 cryopreservation [35]. Furthermore, HL-60 cells cryopreserved in DMSO only showed a higher level  
281 of lipid and protein oxidation, consistent with our proteome findings. Nevertheless, further proteomic  
282 studies on nucleated cell lines are needed to address the issues of the proteome dynamic range or the  
283 proteome profiles post cryopreservation. At this stage the most comprehensive proteomic analysis was  
284 only performed on human nucleated cell lines prior their cryopreservation [31].  
285

286 The present proteomic study showed that Nig or Sal used as CPAs for the cryopreservation of HL-60  
287 cells can either have additive or counter-regulatory effects in comparison to DMSO. For example, in  
288 response to cryo-stress, the level of NADH-ubiquinone oxidoreductase 75 kDa subunit, known to be  
289 involved with cellular oxidative metabolism [36], was upregulated in DMSO +/- Sal and even reached  
290 higher levels in the presence of Nig. This suggests that the Nig effect is more likely to target the  
291 mitochondrial machinery and reduce apoptosis as suggested by Ricci et al [37]. We also found a

292 differential effect of Sal and Nig (when added to DMSO) on key enzymes associated with cryo-stress.

293 For example, LDH protein level was reduced when HL-60 cells were cryopreserved in DMSO alone

294 and the addition of Sal reversed its levels by increasing it up to 1.6 times.

295

296 Differential effect of CPAs on the proteomic outcome of HL-60 cell cryopreservation was also reflected

297 in the correlation between the increases in protein levels of glutathione reductase in the presence of

298 DMSO alone. Glutathione reductase is a critical enzyme known to promote the reductive environment

299 by protecting cells against the damaging effects of free radicals. Surprisingly, its protein levels were

300 not correlated with its activity, which was increased in the presence of Nig or Sal. Similar findings of

301 poor correlation between GR or LDH activities and protein levels have been reported elsewhere by

302 Glanemann et al [38].

303 The heat shock 70 subunits reacted differentially to cryo-stress +/- CPAs. For example, Hsp70-binding

304 protein 1 decreased in the presence of CPAs and increased in the presence of DMSO. In contrast, Heat

305 shock 70 kDa protein 13 was not detected when HL-60 was cryopreserved in DMSO +/- Sal. The reason

306 for such differential expression patterns of Hsps is not clear but might be due to post-translational

307 modifications (e.g. carbonylation) and differential interactions with co-chaperones which might alter

308 their functions during cryo-stress [39].

309

310 The current findings also support the role of Sal in reducing oxidative damage by promoting oxidative

311 DNA repair as shown for hematopoietic stem cells via the regulation of the base excision repair pathway

312 (e.g. poly(ADP-ribose) polymerase-1) [40]. Post thaw, the level of expression of proteins associated

313 with transcriptional activities such as Rho GTPase activating protein 27 and Ras GTPase-activating-

314 like protein IQGAP2 were also increased by Sal in comparison to cells cryopreserved in DMSO alone.

315 This increase in the level of proteins associated with DNA repair/replication and transcriptional

316 activities in the presence of CPA also appeared to be mirrored by an increase in the level of proteins

317 associated with cellular growth. The levels of epidermal growth factor receptor were decrease here by

318 2.1-fold in the presence of Sal, while it was undetected in the recovery phase of HL-60 cells

319 cryopreserved in DMSO +/- Nig. This receptor is generally known to be crucial in DNA replication and

320 cell division [41] while its levels are unchanged when cryo-preserving human ovarian tissue [42]. Such  
1  
2 321 a regulatory element of the DNA damage signalling pathways is paramount for cell survival by  
3  
4 322 controlling passage from the S to the G2/M phases of the cell cycle [43]. In line with our proteomic  
5  
6 323 findings, Sal has shown a noticeable promoting effect on HL-60 cell proliferation during the recovery  
7  
8 324 phase. A similar elevation in proliferative proteins was found in hepatocyte cells in response to the  
9  
10 325 proliferation promoter compound perfluorooctane sulfonate [4]. On the other hand, our findings conflict  
11  
12 326 with the reported effect of Sal on inducing breast cancer cell cycle arrest [45]. Such an anti-proliferative  
13  
14 327 effect was previously attributed to Sal being used as anti-hypoxia agent leading to suppression of  
15  
16 328 hypoxia-induced cell proliferation [46]. Finally, in the present study we have also identified an additive  
17  
18 329 effect of DMSO with Sal or Nig in enhancing some cellular functions by increasing the level of  
19  
20 330 cytoskeleton proteins such as ankyrin-2, synaptotagmin-like or microtubules (**Table 1**) leading to a  
21  
22 331 better HL-60 cell recovery and growth post thaw.  
23  
24  
25  
26

27 332  
28  
29 333 This is the first and largest targeted study aimed at deciphering proteomic profiles associated with the  
30  
31 334 cryopreservation of the nucleated human cell line (HL-60) in DMSO with and without novel cryo-  
32  
33 335 additives agent such as Nig. The proteome profiles associated with HL-60 cryopreservation in DMSO  
34  
35 336 +/- Nig or Sal were mostly validated at the biological level as these correlated with the corresponding  
36  
37 337 biological readouts (e.g. enzymatic, oxidation and proliferative assays). HL-60 cryopreservation in  
38  
39 338 DMSO only has led to oxidative damage and subsequently validating the already known biological  
40  
41 339 features associated with cryo-stress. More importantly, the addition of novel CPAs has identified a  
42  
43 340 potential synergistic or differential cryoprotective effect of these CPAs in comparison to cryopreserving  
44  
45 341 HL-60cells in DMSO only. Predominantly, this study has clearly shown that Nig reduces specifically  
46  
47 342 protein oxidation while Nig or Sal both reduce lipid cryo-oxidation. The presence The most striking  
48  
49 343 finding generated by the current proteomic profiling study is that post thaw, Sal increased the level of  
50  
51 344 proteins that are associated with nuclear activities and subsequently increased cell proliferation in the  
52  
53 345 recovery phase. The presence of CPAs (e. g. Nig or Sal) not only enhanced HL-60 cell recovery post  
54  
55 346 thaw but also significantly reduced cytotoxicity by decreasing the level of LDH activity (**Figure 6**)  
56  
57  
58 347 geneally used as a cytotoxicity marker [47].  
59  
60  
61  
62  
63  
64  
65



1  
2 348 In summary, identifying the relevant molecular (Proteomic analysis) and functional (biological  
3  
4 349 readouts) pathways affected by cryopreservation and successfully targeting the compromised pathways  
5  
6 350 with novel cryoprotective agents is a way forward to limit cryo-damage. The present findings will  
7  
8 351 contribute to enhancing cryo-media formulation and potentially lead to improving future cell and  
9 352 regenerative tissue based therapies.

10  
11 353

## 14 354 **Methods**

### 17 355 *Materials*

18  
19 356 HL-60 cells (HL-60(TB) (RRID:CVCL\_A794)), RPMI-1640 media, fetal Bovine serum  
20  
21 357 (FBS), penicillin –streptomycin, nigerose, salidroside, sterilised filtered dulbecco’s phosphate buffer  
22  
23 358 saline (DPBS), trypan blue solution cell culture, dimethylsulfoxide (DMSO), isopropanol, Tris base,  
24  
25 359 urea, HCL, ammonium biocarbonate, acetonitrile, dithiotheritol (DTT), iodoacetamine (IAA), formic  
26  
27 360 acid, radio immunoprecipitation assay (RIPA) buffer, protease inhibitor cocktail and milli-Q water  
28  
29 361 were all purchased from Sigma-Aldrich (Poole. UK). Mr. Frosty™ Freezing Container was purchased  
30  
31 362 from ThermoFisher scientific (Waltham, MA, USA). Certified Sep-Pak C18 cc vac cartridge was  
32  
33 363 purchased from (Waters, UK). Sequence grade modified trypsin purchased from Promega  
34  
35 364 (Southampton, UK). Glutathione reductase, lactate dehydrogenase and lipid peroxidation (MDA)  
36  
37 365 assay kits were purchased from Abcam (Cambridge, UK). Protein carbonyl colorimetric assay kit was  
38  
39 366 purchased from Cayman Chemical Company (Ann Arbor, MI, USA).  
40  
41  
42  
43  
44  
45  
46  
47

48 367

### 48 368 *Experimental design*

49  
50 369 The study was divided into three arms (**Figure 1**). **Arm 1** involved culturing HL-60 cells up to 70%  
51  
52 370 confluence in RPMI 1460 media, containing 10% (v/v) FBS and 50 U/mL penicillin-streptomycin. HL-  
53  
54 371 60 cells were centrifuged at 100 x g for 5 min and the medium was immediately removed. HL-60 cells  
55  
56 372 were re-suspended in freezing media (10% DMSO and 90% FBS) at 10<sup>6</sup> cells/mL, slowly frozen in  
57  
58 373 cryogenic tubes and stored at -80°C overnight. Next, cells were cryopreserved either in the freezing  
59  
60  
61  
62  
63  
64  
65

374 media in liquid nitrogen. HL-60 cells were thawed in a water bath at 37°C, centrifuged at 100 x g for 5  
1 min and washed three times with RPMI media. Post thawing, HL-60 cells were cultured in a recovery  
2 375 medium containing RPMI, 20% FBS, 5 U/mL penicillin-streptomycin and the FBS concentration was  
3  
4 376 reduced to 10% 24 h post thaw. HL-60 cells were cultured as described above for **Arm 1** with exception  
5  
6 377 of adding 300 µM Nig (**Arm 2**) or 200 µM Sal (**Arm 3**) for 24 h prior to cryopreservation, during  
7  
8 378 cryopreservation and up to 48 h post thaw. The selected concentrations of the cryo-additive agents (e.g.  
9  
10 379 Nig or Sal) were optimised as described in Supplement S4. Cells were maintained at all times in culture  
11  
12 380 at 37°C under 5% CO<sub>2</sub>/ 95% air.  
13  
14 381

15  
16 382 For proteomic and biochemical analysis (Five replicates per arm), HL-60 cells cryopreserved in DMSO  
17  
18 383 +/- Nig or Sal were harvested at approximately 70% confluence prior to freezing and at 24h or 48 h post  
19  
20 384 thaw.  
21  
22 385

#### 23 386 *Sample preparation for NanoLC-MS/MS analyses*

24  
25 387 Human leukaemia (HL-60) cells were used as a nucleated cellular model to establish its proteome  
26  
27 388 profiles when cryo-preserved in DMSO with or without novel CPAs. The experimental design was set  
28  
29 389 up as described in **Figure 1**. Briefly, HL-60 cells were cultured in RPMI media, cryo-preserved in  
30  
31 390 freezing media (10% DMSO and 90% FBS) and recovered in RPMI media (Arm 1). For Arm 2 and 3,  
32  
33 391 300 µM Nig and 200 µM Sal were added respectively to the culture media 24 h prior, during  
34  
35 392 cryopreservation and up to 48 h post thaw. HL-60 proteins were extracted by acetone precipitation.  
36  
37 393 Cell pellets were mixed with 100 µL cold (-20°C) acetone and kept at -20°C for 60 min to allow  
38  
39 394 protein precipitation. The samples were centrifuged at 13,000 x g for 10 min, pellets and air-dried at  
40  
41 395 room temperature for 30 min. Pelleted proteins were homogenised in 6 M urea buffer, vortexed and  
42  
43 396 sonicated for 2 min. 70 mM DTT was added to samples and incubated 30-60 min at room  
44  
45 397 temperature. Next 140 mM Iodoacetic acid alkylating reagent was added, followed by vortexing and  
46  
47 398 incubation for 30-60 min at room temperature. The urea concentration was reduced by adding 775 µL  
48  
49 399 milliQ water and vortexing. Protein concentrations were determined using the Bradford method. After  
50  
51 400 this, 60 µg of extracted proteins were trypsinized in a 1:50 ratio, mixed carefully and left overnight at  
52  
53 401 37°C for digestion. The next day, the reactions were stopped via adjusting the pH to <6 by adding  
54  
55  
56  
57  
58  
59  
60  
61  
62  
63  
64  
65

1  
2 402 concentrated acetic acid. The digested peptides were purified using SEP-PAK C18 purification  
3  
4  
5 403 columns.  
6

7 404

8  
9 405 *NanoLC-MS/MS Analyses*

10  
11 406 Proteomic analyses were performed in a bi-dimensional microUPLC tandem nanoESI-HDMS<sup>E</sup>  
12  
13 407 platform by multiplexed data-independent acquisition experiments [27]. A 2D-RP/RP Acquity UPLC  
14  
15 408 M-Class System (Waters Corporation) coupled to a Synapt G2-Si HDMS mass spectrometer (Waters  
16  
17 409 Corporation) platform was used. The samples were fractionated using a one-dimension reversed-phase  
18  
19 410 approach. Peptide samples (0.5 µg) were loaded into a 100 Å, 1,8µm, 75 µm × 150 mm M-Class HSS  
20  
21 411 T3 column (Waters Corporation). The fractionation was achieved by using an acetonitrile gradient from  
22  
23 412 7% to 40% (v/v) over 95 min at a flow rate of 0.4 µL/min directly into a Synapt G2-Si mass  
24  
25 413 spectrometer. For every measurement, the mass spectrometer was operated in resolution mode with an  
26  
27 414 m/z resolving power of about 20,000 FWHM, using ion mobility with a cross-section resolving power  
28  
29 415 of at least 40 Ω /ΔΩ. MS and MS/MS data were acquired in positive ion mode using ion mobility  
30  
31 416 separation of precursor ions (HDMS<sup>E</sup>) over a range of 50-2000 m/z. The lock mass channel was sampled  
32  
33 417 every 30 s. The mass spectrometer was calibrated with a MS/MS spectrum of [Glu1]-fibrinopeptide B  
34  
35 418 human (Glu-Fib) solution delivered through the reference sprayer of the NanoLock Spray source.  
36  
37

38 419

39  
40 420 *Data processing and database searches*

41  
42  
43 421 Proteins were identified and quantified by using dedicated algorithms and searching against the Uniprot  
44  
45 422 proteomic database of *Homo sapiens* (version 2016/09) [48]. The databases used were reversed “on the  
46  
47 423 fly” during its queries and appended to the original database to assess the false-positive identification  
48  
49 424 rate. For proper spectral processing, database searching and label free quantification, we used  
50  
51 425 Progenesis QI for Proteomics software package with Apex3D, Peptide 3D, and Ion Accounting  
52  
53 426 informatics (Waters Corporation). This software starts with loading of the LC-MS data, followed by  
54  
55 427 alignment and peak detection, which creates a list of interesting peptide ions that are explored within  
56  
57 428 Peptide Ion Stats by multivariate statistical methods. The processing parameters used were 150 counts  
58  
59  
60  
61  
62  
63  
64  
65

429 for the low-energy threshold, 50.0 counts for the elevated energy threshold, and 750 counts for the  
1  
2 430 intensity threshold. Automatic alignment of the runs (all runs in the experiment was assessed for  
3  
4 431 suitability) was used for the processing. In peak picking, was used 8 as maximum ion charge and the  
5  
6 432 sensitivity value was set as 4. Moreover, the following parameters were considered in identifying  
7  
8  
9 433 peptides: 1) digestion by trypsin with at most two missed cleavages; 2) variable modifications by  
10  
11 434 oxidation (M) and fixed modification by carbamidomethyl (C); 3) false discovery rate (FDR) less than  
12  
13 435 1 %. One or more ion fragments per peptide, three or more fragments per protein and one or more  
14  
15 436 peptides per protein were required for ion matching. Identifications that did not satisfy these criteria  
16  
17  
18 437 were rejected. The experiment design was summarized in **figure 1** (See Arm1, Arm2 and Arm3) and  
19  
20 438 the label free protein quantitation was done using Hi-N (N=3) method [49]. The Shapiro–Wilk W-test  
21  
22 439 analysis of variance (ANOVA) was used to identify proteins that were present at different levels. Only  
23  
24 440 those findings with  $p$ -values  $<0.05$  were considered as significant. Finally, proteins with mean changes  
25  
26 441 of 1.5-fold were considered as differentially expressed,  
27  
28  
29 442

### 31 443 **Validation assays**

#### 32 33 444 *Enzymatic activities*

34  
35 445 HL-60 cell pellets were collected and washed in cold PBS once as described above and lysed in 350  $\mu$ L  
36  
37 446 RIPA buffer and 2.85  $\mu$ L protease inhibitors and kept on ice for 30 min. Cell lysates were centrifuged  
38  
39  
40 447 at 100 x g for 5 min and enzymatic assays were performed using an amount equivalent to  $1 \times 10^6$  HL-  
41  
42 448 60 cells according to the manufacturer's instructions. The glutathione reductase (GR) assay is based on  
43  
44 449 measuring spectrophotometrically the resulting chromophore (TNB) [e.g. sulfhydryl-glutathione and  
45  
46 450 5,5'-dithiobis (2-nitrobenzoic acid) (DNTB)] at 405 nm. The first and second readouts were measured  
47  
48  
49 451 at 5 and 10 min intervals using the Spectrostar Nano plate reader (Promega). Lactate dehydrogenase  
50  
51 452 (LDH) assays were also performed according to the manufacturer's instructions. The quantity of NADH  
52  
53 453 was detected spectrophotometrically at 450 nm by mixing NADH detection buffer with the cell  
54  
55 454 supernatant and lysate. The first readout was taken immediately and the samples were incubated in the  
56  
57  
58 455 dark at 37°C with a final colorimetric reading at 30 min.

#### 59 60 456 *Protein and lipid oxidation assays*

1 457 Protein oxidation or carbonylation was measured in two sets of samples (each sample is composed of  
2 458 3 sets of HL-60 cells pooled together) prior to cryopreservation and 24 h post thaw. The carbonylation  
3  
4 459 assay was performed according to the manufacturer's instructions. Briefly, a reaction between 2,4-  
5  
6 460 dinitrophenylhydrazine (DNPH) and oxidized carbonyl groups on proteins was conducted using  
7  
8 461 Cayman's protein assay kit. The derivatized carbonyl groups were quantitated by reading  
9  
10 462 spectrophotometrically at 375 nm. For lipid peroxidation, measurements were carried out in triplicate  
11  
12 463 on amounts equivalent to  $10^6$  cells/mL by identifying the formation of malondialdehyde-thiobarbituric  
13  
14 464 acid (MDA-TBA) adduct in acidic condition at 95°C for 1 h. Samples absorbance's were measured at  
15  
16 465 532 nm using the Spectrostar nano plate reader following the manufacturer's instructions.  
17  
18 466 Malondialdehyde (MDA) concentration was expressed in nmol.  
19

#### 20 467 *Cell proliferation*

21  
22 468 HL-60 cell viability and proliferation were assessed at 1 h, 24 h and 48 h post thaw. Cells were mixed  
23  
24 469 with trypan blue and placed on haemocytometer slides for counting under light microscope in duplicate  
25  
26 470 at each time point.  
27

#### 28 471 *Statistical analysis*

29  
30 472 All enzymatic assays were performed using five biological replicates. The lipid oxidation assay was  
31  
32 473 performed in triplicate and the protein carbonylation assay was carried out in duplicate. Results were  
33  
34 474 presented as mean  $\pm$  standard deviation. Significant differences between groups were determined using  
35  
36 475 Student's t-test for paired and unpaired observations. *P* values  $<0.05$  were considered significant.  
37  
38  
39  
40  
41

42 476

#### 43 477 **Availability of supporting data**

44  
45 478 The mass spectrometry proteomics data have been deposited to the ProteomeXchange Consortium via  
46  
47 479 the PRIDE partner repository with the dataset identifier PXD006998. Additional supporting data is  
48  
49 480 available in the GigaScience GigaDB repository [51].  
50  
51

52 481

#### 53 482 **Abbreviations**

54  
55 483 ANOVA: Analysis of variance  
56  
57  
58  
59  
60  
61  
62  
63  
64  
65

|    |                                                                            |
|----|----------------------------------------------------------------------------|
| 1  |                                                                            |
| 2  |                                                                            |
| 3  | 484 CPAs: Cryo-protective agents                                           |
| 4  |                                                                            |
| 5  |                                                                            |
| 6  | 485 DMSO: Dimethylsulfoxide                                                |
| 7  |                                                                            |
| 8  |                                                                            |
| 9  | 486 DNPH: Dinitrophenylhydrazine                                           |
| 10 |                                                                            |
| 11 |                                                                            |
| 12 | 487 DTT: Dithiotheritol                                                    |
| 13 |                                                                            |
| 14 |                                                                            |
| 15 | 488 DPBS: Dulbecco's phosphate buffer saline                               |
| 16 |                                                                            |
| 17 |                                                                            |
| 18 | 489 FDR: False discovery rate                                              |
| 19 |                                                                            |
| 20 |                                                                            |
| 21 | 490 FBS: Fetal Bovine Serum                                                |
| 22 |                                                                            |
| 23 |                                                                            |
| 24 | 491 FC: Fold Changes                                                       |
| 25 |                                                                            |
| 26 |                                                                            |
| 27 | 492 Glu-Fib: Glu1-fibrinopeptide B human                                   |
| 28 |                                                                            |
| 29 |                                                                            |
| 30 | 493 GR: Glutathione reductase                                              |
| 31 |                                                                            |
| 32 |                                                                            |
| 33 | 494 HL-60: Human Leukaemia cells                                           |
| 34 |                                                                            |
| 35 |                                                                            |
| 36 | 495 LDH: Lactate dehydrogenase                                             |
| 37 |                                                                            |
| 38 |                                                                            |
| 39 | 496 MDA: Malondialdehyde                                                   |
| 40 |                                                                            |
| 41 |                                                                            |
| 42 | 497 MDA-TBA: Malondialdehyde-thiobarbituric acid                           |
| 43 |                                                                            |
| 44 |                                                                            |
| 45 | 498 Nig: Nigerose                                                          |
| 46 |                                                                            |
| 47 |                                                                            |
| 48 | 499 ND: Not Detected                                                       |
| 49 |                                                                            |
| 50 |                                                                            |
| 51 | 500 PT: Post thaw                                                          |
| 52 |                                                                            |
| 53 |                                                                            |
| 54 | 501 PC: Prior cryopreservation                                             |
| 55 |                                                                            |
| 56 |                                                                            |
| 57 | 502 RIPA: Radio immunoprecipitation assay                                  |
| 58 |                                                                            |
| 59 |                                                                            |
| 60 | 503 Sal: Salidroside                                                       |
| 61 |                                                                            |
| 62 |                                                                            |
| 63 | 504 DNTB: Sulfhydryl-glutathione and 5, 5'-dithiobis [2-nitrobenzoic acid] |
| 64 |                                                                            |
| 65 |                                                                            |

505 UP: Unique peptides

506

507 **Declarations**

508 *Ethics approval and consent to participate*

509 Not applicable.

510

511 *Consent for publication*

512 Not applicable

513

514 *Competing interests*

515 The authors declare no competing interests.

516

517 *Funding*

518 This work was supported by the King AbdulAziz City for Science and Technology research fund. JSC

519 and DMS are funded by FAPESP (São Paulo Research Foundation, grants 2014/14881-1,

520 2013/08711-3 and 2014/10068-4) and CNPq (The Brazilian National Council for Scientific and

521 Technological Development, grant 460289/2014-4).

522

523 *Author contributions*

524 NASA performed all experimental manipulations, sample preparation for mass spectrometry and

525 prepared the tables and figures and performed bioinformatic analysis. JSC performed sample

526 acquisition and data analysis mass spectrometry. DM supervised the proteomics pipeline. NKHS co-

527 supervised the project. HR designed and supervised the project, performed biological interpretation of

528 the data. NASA, JSC, DM, NKHS and HR wrote the manuscript. All authors edited otherwise

529 approved the final version of the manuscript.

530

1  
2  
3  
4  
5  
6  
7  
8  
9  
10  
11  
12  
13  
14  
15  
16  
17  
18  
19  
20  
21  
22  
23  
24  
25  
26  
27  
28  
29  
30  
31  
32  
33  
34  
35  
36  
37  
38  
39  
40  
41  
42  
43  
44  
45  
46  
47  
48  
49  
50  
51  
52  
53  
54  
55  
56  
57  
58  
59  
60  
61  
62  
63  
64  
65531 **References**

- 532 1. Valeri CR, Ragno G, Pivacek LE, Cassidy GP, Srey R, Hansson-Wicher M, Leavy ME. An  
533 Experiment with Glycerol-Frozen Red Blood Cells Stored at -80°C for up to 37 years. *Vox Sanguinis*  
534 2000; 79(3):168–174.
- 535 2. Manson C, Brindley DA, Culme-Seymour EJ, Davie NL. Cell therapy industry: billion dollar  
536 global business with unlimited potential. *Regen. Med.* 2011; (6):265-272.
- 537 3. Beirão J, Zilli L, Vilella S, Cabrita E, Schiavone R et al. Improving sperm cryopreservation with  
538 antifreeze proteins: effect on gilthead seabream (*Sparus aurata*) plasma membrane lipids. *Biol Reprod.*  
539 2012; 86 (2):59, 1-9
- 540 4. Alotaibi NAS, Slater, NKH, Rahmoune H. Salidroside as a Novel Protective Agent to Improve Red  
541 Blood Cell Cryopreservation. *PLOS ONE* 2016; 11(9), e0162748.
- 542 5. Hunt, C. J. Cryopreservation of Human Stem Cells for Clinical Application: A Review. *Transfus.*  
543 *Med. Hemother.* 2011; (38):107-123.
- 544 6. Fuller BJ. Cryoprotectants: the essential antifreezes to protect life in the frozen state. *Cryo letters*  
545 2004; 25 (6), 375–88. Retrieved from <http://www.ncbi.nlm.nih.gov/pubmed/15660165>
- 546 7. Tatone C, Di Emidio G, Vento elena M, Artini PG. Cryopreservation and oxidative stress in  
547 reproductive cells. *Gynecological Endocrinology* 2010; 26(8):563-567.
- 548 8. Xu X, Cowley S, Flaim, CJ, James W, Seymour L, Cui, Z. The roles of apoptotic pathways in the  
549 low recovery rate after cryopreservation of dissociated human embryonic stem cells. *Biotech Prog.*  
550 2010; 26(3):827–837.
- 551 9. Mathias FJ, D'Souza F, Uppangala S, Salian SR, Kalthur G, Adiga SK. Ovarian tissue vitrification  
552 is more efficient than slow freezing in protecting oocyte and granulosa cell DNA integrity. *System*  
553 *Biology in Reproductive Medicine* 2014; 60(6):317-322.



- 554 10. Peris SI, Bilodeau JF, Dufour M, Bailey JL. Impact of cryopreservation and reactive oxygen  
1 species on DNA integrity, lipid peroxidation, and functional parameters in ram sperm. *Molecular*  
2  
3  
4 556 *Reproductive and Development* 2007; 74:878-892.  
5  
6
- 7 557 11. Chen GQ, Ren L, Zhang J, Reed BM, Zhang D, Shen XH. Cryopreservation affects ROS-induced  
8  
9 558 oxidative stress and antioxidant response in *Arabidopsis* seedlings. *Cryobiology* 2015; 70(1):38-47.  
10  
11
- 12 559 12. Bagchi A, Woods EJ, Crister JK. Cryopreservation and vitrification: recent advances in fertility  
13  
14 560 preservation technologies. *Expert Rev Med Devices* 2008; 5(3):359-370.  
15  
16
- 17 561 13. Wang S, Wang W, Xu Y, Tang M, Fang J, Sun H. et al. Proteomic characteristics of human sperm  
18  
19 562 cryopreservation. *Proteomics* 2014; 14(2-3): 298–310.  
20  
21
- 22 563 14. Baumber J, Ball B, Linfor JJ. Assessment of cryopreservation of equine spermatozoa in the  
23  
24 564 presence of enzyme scavengers and antioxidants. *American Journal of Veterinary Research* 2005;  
25  
26 565 66(5):772-779.  
27  
28
- 29 566 15. Martín-Ibáñez R, Hovatta O, Canals JM. Cryopreservation of Human Pluripotent Stem Cells: Are  
30  
31 567 We Going in the Right Direction?, *Current Frontiers in Cryobiology* 2012, Prof. Igor Katkov (Ed.),  
32  
33 568 ISBN: 978-953-51-0191-8.  
34  
35  
36
- 37 569 16. Gurruchaga H, del Burgo LS, Garate A, Delgado D, Sanchez P, Orive G, Ciriza J, Sanchez M,  
38  
39 570 Pedraz JL. Cryopreservation of Human Mesenchymal Stem Cells in an Allogeneic Bio-scaffold based  
40  
41 571 on Platelet Rich Plasma and Synovial Fluid Scientific. Reports 2017; 7(1): 15733.  
42  
43 572 DOI:10.1038/s41598-017-16134-6.  
44  
45  
46
- 47 573 17. Choudhery MS, Badowski M, Muise A, Harris DT. Utility of cryopreserved umbilical cord tissue  
48  
49 574 for regenerative medicine. *Current Stem Cell Research and Therapy* 2013; 8(5):370-380.  
50  
51
- 52 575 18. Stéphenne X, Najimi M, Sokal E. Hepatocyte cryopreservation: Is it time to change the strategy?  
53  
54 576 *World Journal of Gastroenterology* 2010; 16(1), 1-14.  
55  
56
- 57 577 19. Nynca J, Arnold GJ, Frohlich T, Ciereszko A. Cryopreservation-induced alterations in protein  
58  
59 578 composition of rainbow trout semen. *Proteomics* 2015; 15(15):2643-2654.  
60  
61  
62  
63  
64  
65

- 579 20. Sung JY, Md Saidur R, Woo SK, Do YR, Yoo JP, Myung GP. Proteomic identification of  
1 cryostress in epididymal spermatozoa. *J Anim Sci Biotechnol.* 2015; 7 (67):1-12.  
2  
3  
4
- 581 21. Volk, G. M. Application of Functional Genomics and Proteomics to Plant Cryopreservation.  
6  
7 582 *Current Genomics* 2010; 11(1):24-29.  
8  
9
- 10 583 22. Wagh V, Meganathan K, Hatap S, Gaspar JA, Winkler J, Spitkovsky D et al. Effects of  
11  
12 584 cryopreservation on the transcriptome of human embryonic stem cells after thawing and culturing.  
13  
14 585 *Stem Cell Rev.* 2011; 7(3):506-517.  
15  
16
- 17 586 23. Yoon SJ., Rahman MS, Kwon WS, Park YJ, Pang MG. Addition of Cryoprotectant Significantly  
18  
19 587 Alters the Epididymal Sperm Proteome. *PLoS ONE* 2016; 11(3):e0152690.  
20  
21  
22
- 23 588 24. Zilli L, Beirao J, Schiavone R, Herraes MP, Gnoni A, Vilella S. Comparative Proteome Analysis  
24  
25 589 of Cryopreserved Flagella and Head Plasma Membrane Proteins from Sea Bream Spermatozoa: Effect  
26  
27 590 of Antifreeze Proteins. *PLOS ONE* 2014; (6):e99992.  
28  
29
- 30 591 25. Kelly G. *Rhodilla rosea*: a possible plant adaptogen. *Alter Med Rev.* 2001; 3:293-302.  
31  
32
- 33 592 26. Qian EW, Ge DT, Kong, SK. Salidroside protects human erythrocytes against hydrogen peroxide-  
34  
35 593 induced apoptosis. *Journal of Natural Products* 2012; 75(4):531–537.  
36  
37
- 38 594 27. Mastuda K, Watanabe H, Fujimoto K, Aso K. Isolation of Nigerose and Kojibiose from Dextrans.  
39  
40 595 *Nature* 1961; 191:278,  
41  
42
- 43 596 28. Consonni R, Cagliani LR, Cogliati C. NMR Characterization of Saccharides in Italian Honeys of  
44  
45 597 Different Floral Sources. *J. Agric. Food Chem.* 2012; 60 (18):4526-4534.  
46  
47  
48  
49 598 .  
50
- 51 599 29. Vizcaino JA, et al. A guide to the Proteomics Identifications Database proteomics data repository.  
52  
53 600 *Proteomics* 2009; 9:4276–4283.  
54  
55  
56
- 57 601 30. Pathan M, et al. FunRich: An open access standalone functional enrichment and interaction  
58  
59 602 network analysis tool. *Proteomics* 2015; 15:2597-2601.  
60  
61  
62  
63  
64  
65

- 603 31. Fahy G.M. Cryoprotectant toxicity: biochemical or osmotic? *Cryo Letters* 1984; 5:79–90.
- 604 32. Geiger T, Wehner A, Schaab C, Cox J, Mann M. Comparative proteomic analysis of eleven  
605 common cell lines reveals ubiquitous but varying expression of most proteins. *Mol Cell Proteomics*  
606 2012; 11(3):M111.014050.
- 607 33. Marcucci F, Corti A, Berenson R. Ways to improve tumour uptake and penetration of drugs into  
608 solid tumors. *Frontiers Research Topics* 2010; 3:1-14.
- 609 34. Herberth M, Koethe D, Cheng T, Krzysztan ND, Schoeffmann S, Guest PC et al. Impaired  
610 glycolytic response in peripheral blood mononuclear cells of first-onset antipsychotic-naive  
611 schizophrenia patients. *Mol Psychiatry* 2011; 16(8):848-859.
- 612 35. Lunt SY, Vander Heiden MG. Aerobic glycolysis: meeting the metabolic requirements of cell  
613 proliferation. *Annu. Rev. Cell Dev. Biol.* 2011; 27:441–464.
- 614 36. Baust JG, Gao D, Baust, JM. Cryopreservation: An emerging paradigm change. *Organogenesis*  
615 2009; 5(3):90–96.
- 616 37. Iuso A, Scacco S, Piccoli C, Bellomo F, Petruzzella V, Trentadue R et al. Dysfunctions of cellular  
617 oxidative metabolism in patients with mutations in the *NDUFS1* and *NDUFS4* genes of complex I.  
618 *Biol .* 2006; 281(15):10374-10380.
- 619 38. Ricci J, Munoz-Pinedo C, Fitzgerald P, Bailly-Maitre B, Perkins G, Yadava N et al. Disruption of  
620 mitochondrial function during apoptosis is mediated by caspase cleavage of the p75 subunit of  
621 complex I of the electron transport chain. *Cell* 2004; 117(6):773-786.
- 622 39. Glanemann C, Loos A, Gorret N et al. Disparity between changes in mRNA abundance and  
623 enzyme activity in *Corynebacterium glutamicum*: implications for DNA microarray analysis. *Appl*  
624 *Microbiol Biotechnol.* 2003; 61:61–68.
- 625 40. Mayer M. Hsp70 chaperone dynamics and molecular mechanism. *Trends in Biochem Sci.* 2013;  
626 38(10):507-514.

- 627 41. Xue Li, Ozlem E, Liang L, Qidong Y, Andrew W, Wei D. Binding to WGR Domain by  
1  
2 628 Salidroside Activates PARP1 and Protects Hematopoietic Stem Cells from Oxidative Stress. *Antioxid*  
3  
4 629 *Redox Signal* 2014; 20(12):1853–1865.  
5  
6  
7 630 42. Oda K, Matsuoka Y, Funahashi A, Kitano H. A comprehensive pathway map of epidermal growth  
8  
9 631 factor receptor signaling. *Mol Syst Biol.* 2005; doi: 10.1038/msb4100014.  
10  
11  
12 632 43. Jianping Qu, Pierre Arnaud Godin, Michelle Nisolle, Jacques Donnez (2000) Distribution and  
13  
14 633 epidermal growth factor receptor expression of primordial follicles in human ovarian tissue before and  
15  
16 634 after cryopreservation. *Human Reproduction.* 15 (2):302–310  
17  
18  
19 635 44. Lou Z, Chini C, Minter-Dykhouse K, Chen J. Mediator of DNA damage checkpoint protein 1  
20  
21 636 regulates BRCA1 localization and phosphorylation in DNA damage checkpoint control. *J Biol Chem.*  
22  
23 637 2003; 278:13599-13602.  
24  
25  
26  
27 638 45. Cui R, Zhanf H, Guo X, Cui Q, Wang J, Dai J. Proteomic analysis of cell proliferation in a human  
28  
29 639 hepatic cell line (HL-7702) induced by perfluorooctane sulfonate using iTRAQ. *J Hazard Mater.*  
30  
31 640 2015; 299:361-370.  
32  
33  
34 641 46. Hu X, Zhang X, Qiu S, Yu D, Lin S. Salidroside induces cell-cycle arrest and apoptosis in breast  
35  
36 642 cancer. *Biochemical and Biophysical Research Communications* 2011; 398(1):62-67.  
37  
38  
39 643 47. Qi YJ, Cui S, Lu D, Yang YZ, Luo Y, Ma L et al. Effects of the aqueous extract of a Tibetan herb,  
40  
41 644 *Rhodiola algida vartangutica* on proliferation and HIF-1 alfa, HIF-2 alfa expression in MCF-7 cells  
42  
43 645 under hypoxic condition in vitro. *Cancer Cell Int.* 2015; 15(81):1-9.  
44  
45  
46  
47 646 48. Niles A L, Moravec RA, Riss TL. In Vitro Viability and Cytotoxicity Testing and Same-Well  
48  
49 647 Multi-Parametric Combinations for High Throughput Screening. *Current Chemical Genomics* 2009;  
50  
51 648 3:33-41.  
52  
53  
54 649  
55  
56 650 49. Li, G. Z., Vissers, J. P., Silva, J. C., Golick, D., Gorenstein, M. V., Geromanos, S. J., Database  
57  
58 651 searching and accounting of multiplexed precursor and product ion spectra from the data independent  
59  
60  
61  
62  
63  
64  
65

652 analysis of simple and complex peptide mixtures. *Proteomics* 2009; 9:1696-1719.

653

654 50. Silva JC, Gorenstein MV, Li GZ, Vissers JP, Geromanos SJ. Absolute quantification of proteins

655 by LCMSE: a virtue of parallel MS acquisition. *Mol Cell Proteomics* 2006; 5(1):144-56.

656

657 51. Rahmoune H; Al-Otaibi N; Cassoli J; Martins-de-Souza D; Slater N (2018): Supporting data for

658 "Human Leukaemia cells (HL-60) proteomic and biological signatures underpinning cryo-damage are

659 differentially modulated by novel cryo-additives" *GigaScience Database*.

660 <http://dx.doi.org/10.5524/100526>

661

662

663

664

665

666

667

668

669

670

671

672

673

674

675

1

2

3 676

4

5

6 677

7

8

9 678

10

11

12 679

13

14

15 680

16

17 681

18

19 682

20

21 683

22

23

24 684

25

26 685

27

28 686

29

30 687

31

32 688

33

34 689

35

36 690

37

38 691

39

40 692

41

42 693

43

44 694

45

46 695

47

48 696

49

50 697

51

52 698

53

54

55

56

57

58

59

60

61

62

63

64

65

**Figure. 1. Schematic diagram.** Experimental design of HL-60 cryopreserved in Dimethylsulfoxide (DMSO) [n=5] +/- Nigerose (Nig) [n=5 replicates] or Salidroside (Sal) [n=5 replicates]. Proteomic analysis and corresponding biological assays were conducted 24 h prior and post cryopreservation of HL-60 cell cultures grown in RPMI-1640 media (RPMI) +/- Nig or Sal.

**Figure. 2. Proteome analysis.** HL-60 total number of differentially expressed proteins cryopreserved in DMSO +/- Nig or Sal [n=5 per arm]. **A)** Venn diagram illustrating HL-60 cells unique and overlapped number of significantly changing proteins 24 h prior and post thaw. The numbers in the circles represent the number of identified genes significantly changing prior/post HL-60 cryopreserved in DMSO only [n=5 replicates], DMSO + Nig [n=5 replicates] or DMSO + Sal [n=5 replicates]. **B)** Table representing the total number of number of identified genes representing HL-60 upregulated (blue arrow) and downregulated (red arrow) proteins in each of the above cryo-condition.

**Figure. 3. Biological pathways analysis.** Comparative overview of the biological processes (**A**) and functional functions (**B**) representing mammalian HL-60 cells cryopreserved in DMSO +/- Nig or Sal. The percentage of proteins extracted from HL-60 cells cryopreserved in DMSO alone, DMSO/Nig or DMSO/Sal were identified using FunRich software.

**Figure 4. Cell growth.** HL-60 cell proliferation was measured in duplicate at 1h, 24 h and 48 h post thaw. Cells were initially either cultured in RPMI media containing Nig (300  $\mu$ M) or Sal (200  $\mu$ M) and cryopreserved in DMSO +/- Nig or Sal. HL-60 cells were thawed, washed and cultured in RPMI media containing Nig (300  $\mu$ M) or Sal (200  $\mu$ M) for up to 48 h. Data are expressed as mean.

699 **Figure 5. Oxido-Redox enzymatic assays.** Intra-cellular enzymatic activities of HL-60 were measured  
1 prior freezing (Control). Cells were frozen in DMSO +/- Sal or Nig and HL-60 GR and LDH activities  
2 700  
3 were measured in RPMI media only, RPMI +Nig (300  $\mu$ M) or in RPMI + Sal (200  $\mu$ M) 24 h post thaw.  
4 701  
5  
6 702 **A)** Glutathione reductase (GR) activity (mU/ml). **B)** LDH activity (mU/ml). Data are presented as a  
7  
8  
9 703 mean [n=5 replicates]  $\pm$  SD. (\* P value < 0.05).

10  
11 704 **Figure 6. Lipid peroxidation (MDA) assay.** Lipid oxidation of HL-60 incubated prior and post thaw  
12  
13 in media +/- Nig or Sal and cryopreserved in DMSO +/- Nig (300  $\mu$ M) or Sal (200  $\mu$ M). The data are  
14 705  
15 represented in mean [n=3 replicates]  $\pm$  SD (\* P value <0.05).  
16 706  
17

18  
19 707 **Figure 7. Protein carbonylation or oxidation of cryopreserved HL-60 cells.** The control represents  
20  
21 708 protein carbonylation level prior HL-60 cryopreservation in RPMI only, RPMI + 300  $\mu$ M Nig or  
22  
23 709 RPMI + 200  $\mu$ M Sal. Cells were cryopreserved in RPMI/DMSO +/- Nig or Sal and protein  
24  
25 710 carbonylation was measured in duplicate (each sample is composed of 3 sets of HL-60 cells pooled  
26  
27 711 together) 1 h post thaw in RPMI media containing Sal or Nig. Data are expressed as mean  $\pm$  SD (\* P  
28  
29 712 value <0.05).  
30  
31  
32

33 713 **Table S1.** Label-free LCMS/MS proteome analysis of Human promyelocytic leukemia HL-60 cells  
34 714 cryopreserved in DMSO [n=5 replicates].  
35  
36  
37  
38  
39  
40  
41  
42  
43  
44  
45  
46  
47  
48  
49  
50  
51  
52  
53  
54  
55  
56  
57  
58  
59  
60  
61  
62  
63  
64  
65

715 **Table S2.** Label-free LCMS/MS proteome analysis of Human promyelocytic leukemia HL-60 cells  
1 716 cryopreserved in DMSO + Nig [n=5 replicates].  
2

3 717  
4

5 718 **Table S3.** Label-free LCMS/MS proteome analysis of Human promyelocytic leukemia HL-60 cells  
6 719 cryopreserved in DMSO + Sal [n=5 replicates].  
7

8 720  
9

10 721 **Figure S4. CPAs dose response.** The effect of Nig and Sal at different concentrations on HL-60 cell  
11  
12 722 viability post cryopreservation in 10% DMSO +/- Nig or Sal. HL-60 cell cryosurvival was measured in  
13  
14 723 triplicate using trypan blue.  
15  
16

17 724 **Table 1:** Proteins found at significantly different levels ( $p < 0.05$ ) using label-free LCMS/MS profiling  
18 725 of the human promyelocytic leukemia HL-60 cells cryopreserved in DMSO [n=5 replicates] +/- Sal  
19 726 [n=5 replicates] or Nig [n=5 replicates].  
20  
21  
22  
23  
24  
25  
26  
27  
28  
29  
30  
31  
32  
33  
34  
35  
36  
37  
38  
39  
40  
41  
42  
43  
44  
45  
46  
47  
48  
49  
50  
51  
52  
53  
54  
55  
56  
57  
58  
59  
60  
61  
62  
63  
64  
65



727

728

| Uniprot entry                        | Protein name                                            | DMSO alone |                   | DMSO/nigerose |                    | DMSO/salidroside |                    |
|--------------------------------------|---------------------------------------------------------|------------|-------------------|---------------|--------------------|------------------|--------------------|
|                                      |                                                         | UP         | FC<br>(log2PC/PT) | UP            | FC<br>(log2 PC/PT) | UP               | FC<br>(log2 PC/PT) |
| <b>Oxido-Redox</b>                   |                                                         |            |                   |               |                    |                  |                    |
| Q99497                               | Protein deglycase DJ-1                                  | ND         |                   | ND            |                    | 12               | 1.4                |
| P00338                               | Lactate dehydrogenase A chain                           | 11         | -1.6              | ND            |                    | 11               | -1.6               |
| P00390                               | Glutathione reductase                                   | 7          | 3.2               | ND            |                    | ND               |                    |
| P00441                               | Superoxide dismutase [Cu-Zn]                            | 8          | 1.4               | ND            |                    | ND               |                    |
| Q16881                               | Thioredoxin reductase 1                                 | 2          | 14.6              | 2             | 35.0               | 2                | 15                 |
| P28331                               | NADH-ubiquinone oxidoreductase 75 kDa subunit           | 4          | 4.9               | 4             | 46.0               | 4                | 16                 |
| Q9Y2Q3                               | Glutathione S-transferase kappa 1                       | 2          | -8.0              | 2             | -13.6              | 2                | -3.5               |
| P30048                               | Thioredoxin-dependent peroxide reductase, mitochondrial | 2          | -3.0              | 2             | -5.2               | 2                | -8.8               |
| C9J0G0                               | Acyl-coenzyme A oxidase (ACOX)                          | 2          | 32.0              | 2             | 16.8               | 2                | 42.7               |
| P49748                               | Very long-chain specific acyl-CoA dehydrogenase         | 5          | -2.7              | 5             | -11.6              | 5                | -14.8              |
| P16152                               | Carbonyl reductase                                      | ND         |                   | ND            |                    | 5                | -1.5               |
| P49368                               | T-complex protein 1 subunit gamma                       | ND         |                   | 17            | 1.2                | ND               |                    |
| P40227                               | T-complex protein 1 subunit zeta                        | ND         |                   | 7             | 1.4                | ND               |                    |
| Q9NZL4                               | Hsp70-binding protein 1                                 | 3          | 14.4              | 3             | -71                | 3                | -77.0              |
| P48723                               | Heat shock 70 kDa protein 13                            | ND         |                   | 2             | 15.8               | ND               |                    |
| P34932                               | Heat shock 70 kDa protein 4                             | ND         |                   | ND            |                    | 17               | 1.3                |
| Q53EL6                               | Programmed cell death protein 4                         | ND         |                   | ND            |                    | 4                | 1.6                |
| P08758                               | Annexin A5 (Annexin-V)                                  | 6          | -6.6              | 6             | -9.2               | 6                | 4.5                |
| Q5VT06                               | Centrosome-associated protein 350                       | 29         | 88.9              | 29            | 61.2               | 29               | 81.2               |
| P25787                               | Proteosome subunit alpha type-2 (PSAT2)                 | ND         |                   | 3             | 34.4               | ND               |                    |
| <b>Nuclear activities regulation</b> |                                                         |            |                   |               |                    |                  |                    |
| Q9BTE3                               | Mini-chromosome maintenance complex-binding protein     | ND         |                   | 2             | 11.0               | 2                | 70.0               |
| P33993                               | DNA replication licensing factor MCM7                   | ND         |                   | 9             | -3.5               | 9                | -2.4               |
| P35658                               | Nuclear pore complex protein Nup214                     | ND         |                   | ND            |                    | 6                | 1.6                |
| Q86YP4                               | Transcriptional repressor p66-alpha                     | ND         |                   | ND            |                    | 11               | 2.5                |
| Q5T890                               | DNA excision repair protein ERCC-6-like                 | 4          | -14.4             | 4             | -13.8              | 4                | -8.8               |
| Q99973                               | Telomerase protein component 1                          | ND         |                   | 3             | -2.3               | 3                | -2.3               |
| Q8WXI9                               | Transcriptional repressor p66-beta                      | 4          | -2.6              | ND            |                    | ND               |                    |
| O14980                               | Exportin-1                                              | 5          | 3.0               | ND            |                    | 5                | 3.7                |

16  
17  
18  
19  
20  
21  
22  
23  
24  
25  
26  
27  
28  
29  
30  
31  
32  
33  
34  
35  
36  
37  
38  
39  
40  
41  
42  
43  
44  
45  
46  
47  
48  
49  
50  
51  
52  
53  
54  
55  
56  
57  
58  
59  
60  
61  
62  
63  
64  
65

31

|                                 |                                                            |    |       |    |        |    |       |
|---------------------------------|------------------------------------------------------------|----|-------|----|--------|----|-------|
| A6H8Y1                          | Transcription factor TFIIIB component B                    | 9  | 2.1   | 9  | 7.9    | 9  | 10.6  |
| Q15054                          | DNA polymerase delta subunit 3                             | 2  | - 3.4 | 2  | - 30.0 | 2  | -22.3 |
| <b>Cell growth and function</b> |                                                            |    |       |    |        |    |       |
| P00533                          | Epidermal growth factor receptor                           | ND |       | ND |        | 4  | - 2.1 |
| Q14676                          | Mediator of DNA damage checkpoint protein 1                | ND |       | 5  | 17.0   | 5  | 21.4  |
| Q6ZUM4                          | Rho GTPase-activating protein 27                           | 2  | 13.7  | 2  | 39.5   | 2  | 75.4  |
| Q9BYX2                          | TBC1 domain family member 2A                               | 3  | 10.5  | 3  | 11.2   | 3  | 39.0  |
| O14976                          | Cyclin-G-associated kinase                                 | 4  | 4.1   | 4  | 8.5    | 4  | 9.8   |
| Q8N163                          | Cell cycle and apoptosis regulator protein 2               | 9  | 1.5   | 9  | 1.8    | 9  | 2.3   |
| O94986                          | Centrosomal protein 152 KDa                                | ND |       | 7  | 59.8   | 7  | 19.0  |
| Q13576                          | RasGTPase-activating-like protein IQGAP2                   | 4  | 15.2  | 4  | 65.7   | 4  | 40.9  |
| Q14789                          | Golgin subfamily B member                                  | 14 | 18.9  | 14 | 37.2   | 14 | 21.3  |
| P49327                          | Fatty acid synthase                                        | ND |       | 39 | 10.4   | 39 | 9.0   |
| Q01484                          | Ankyrin-2                                                  | 17 | 32.0  | 17 | 39.7   | 17 | 48.8  |
| O00423                          | Echinoderm microtubule-associated protein-like 1           | 4  | 23.0  | 4  | 42.0   | 4  | 32.2  |
| A0A0U1RR07                      | Synaptotagmin-like protein 2                               | 4  | 4.1   | 4  | 9.0    | 4  | 22.0  |
| Q15691                          | Microtubule-associated protein RP/EB family member 1       | 10 | 7.1   | 10 | 3.2    | 10 | 7.1   |
| E9PNZ4                          | Microtubule-actin cross-linking factor 1, isoforms 1/2/3/5 | 2  | 12.6  | 2  | 12.3   | 2  | 4.4   |

Abbreviations: UP = unique peptides, ND = Not Detected, FC = Fold Changes indicating the ratio of differentially expressed proteins identified prior cryopreservation (PC) and post thaw (PT).

Figure. 1

738

739

740

741

742

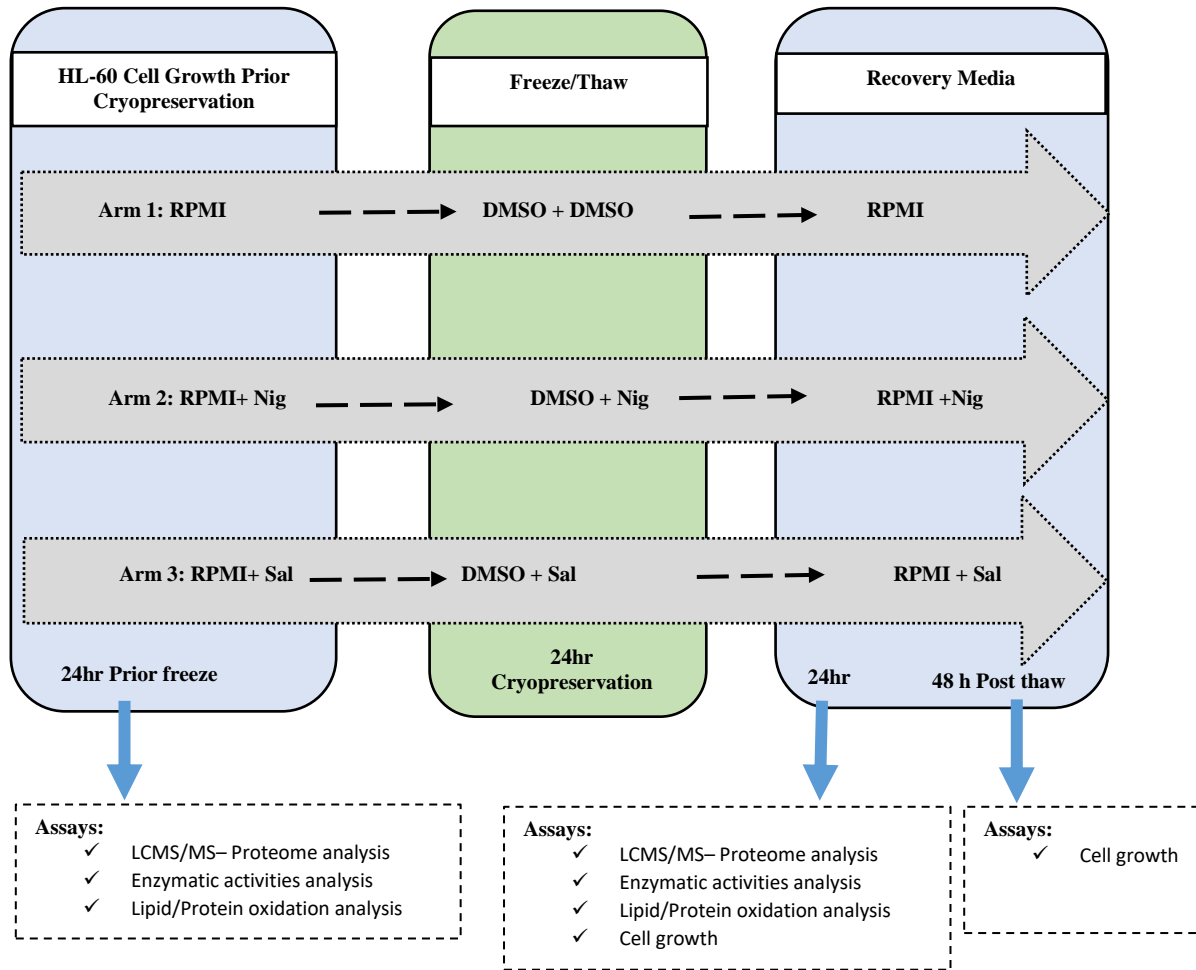

16  
17  
18  
19  
20  
21  
22  
23  
24  
25  
26  
27  
28  
29  
30  
31  
32  
33  
34  
35  
36  
37  
38  
39  
40  
41  
42  
43  
44  
45  
46  
47  
48  
49  
50  
51  
52  
53  
54  
55  
56  
57  
58  
59  
60  
61  
62  
63  
64  
65

**Figure 2.****A)**

| Conditions                 | DMSO only | DMSO/Nig | DMSO/Sal |
|----------------------------|-----------|----------|----------|
| No. of identified proteins | 886       | 1140     | 1032     |
| No. of identified genes    | 892       | 1152     | 1059     |

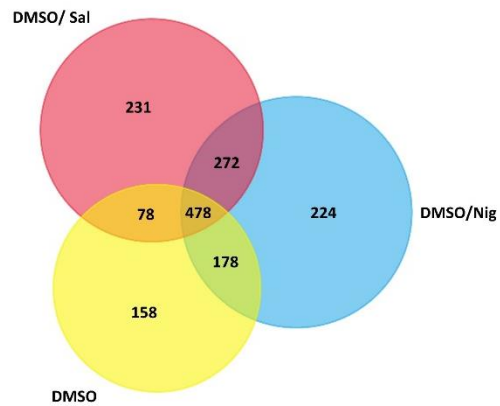**B)**

| Up/down regulated | DMSO only | DMSO/Nig | DMSO/Sal |
|-------------------|-----------|----------|----------|
| ↑                 | 484       | 536      | 491      |
| ↓                 | 403       | 604      | 541      |

16  
17  
18  
19  
20  
21  
22  
23  
24  
25  
26  
27  
28  
29  
30  
31  
32  
33  
34  
35  
36  
37  
38  
39  
40  
41  
42  
43  
44  
45  
46  
47  
48  
49  
50  
51  
52  
53  
54  
55  
56  
57  
58  
59  
60  
61  
62  
63  
64  
65

Figure 3.

34

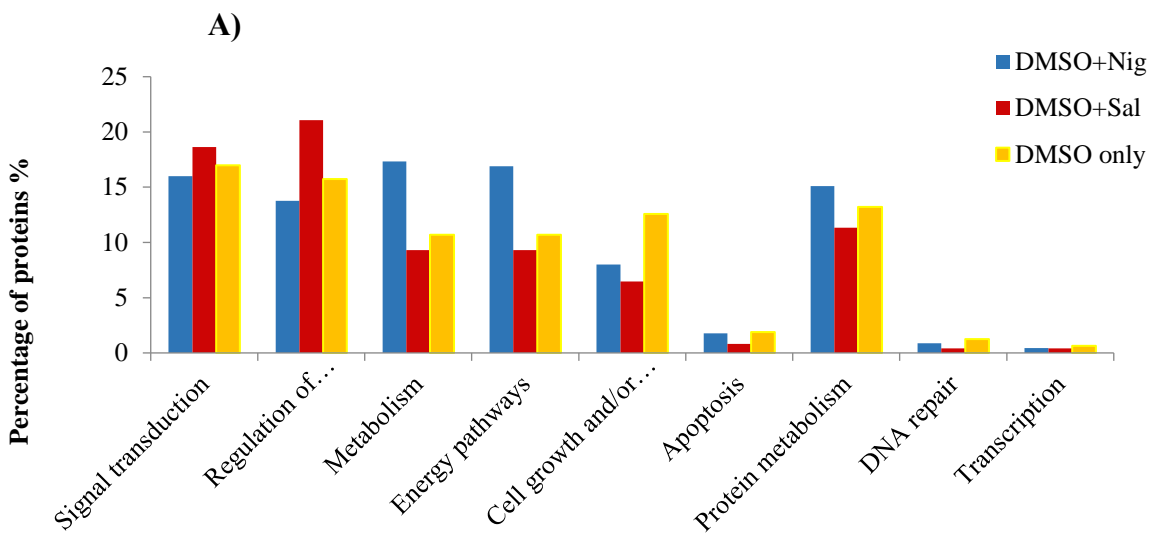

757

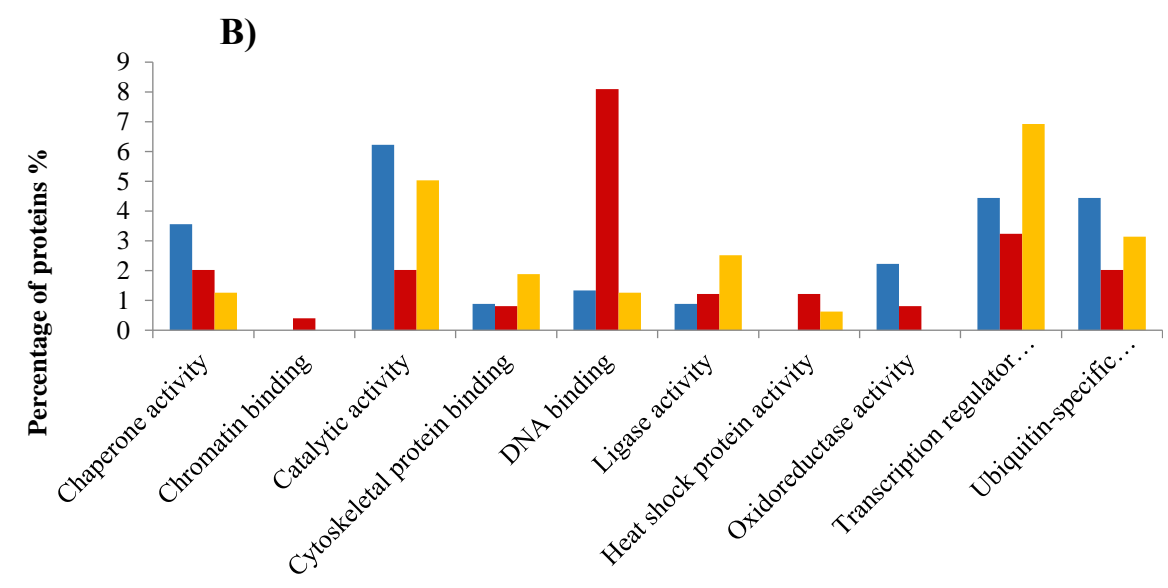

758

759

Figure 4.

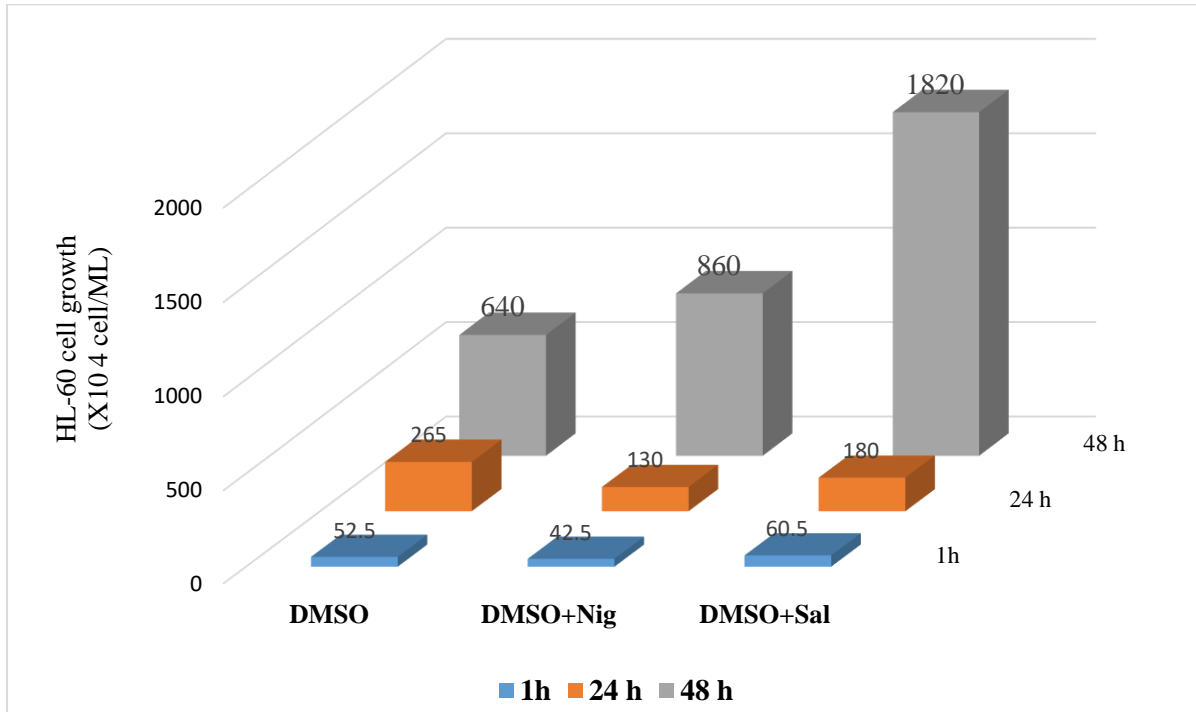

16  
17  
18  
19  
20  
21  
22  
23  
24  
25  
26  
27  
28  
29  
30  
31  
32  
33  
34  
35  
36  
37  
38  
39  
40  
41  
42  
43  
44  
45  
46  
47  
48  
49  
50  
51  
52  
53  
54  
55  
56  
57  
58  
59  
60  
61  
62  
63  
64  
65

FIG.5

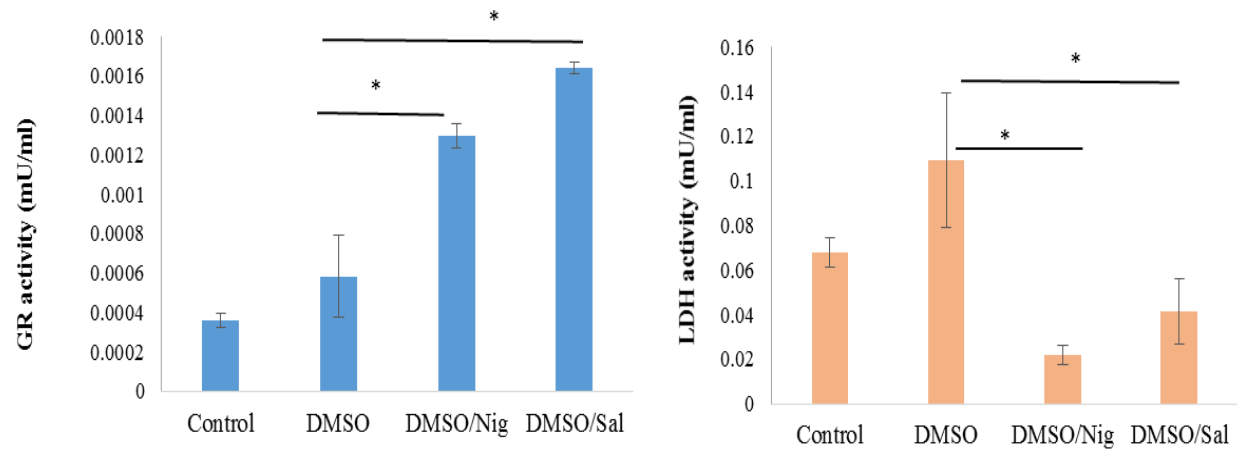

Figure 6.

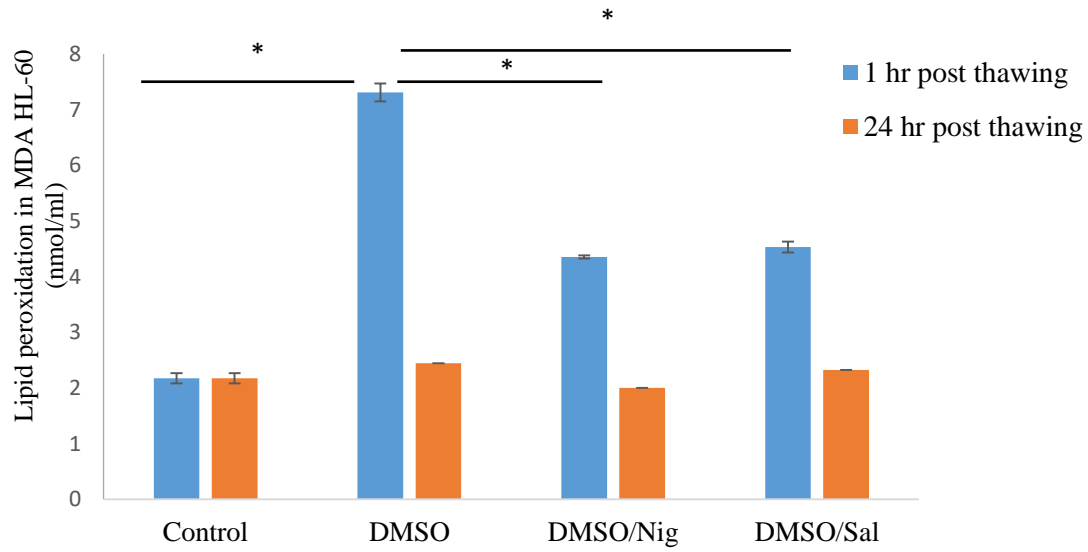



Figure 7.

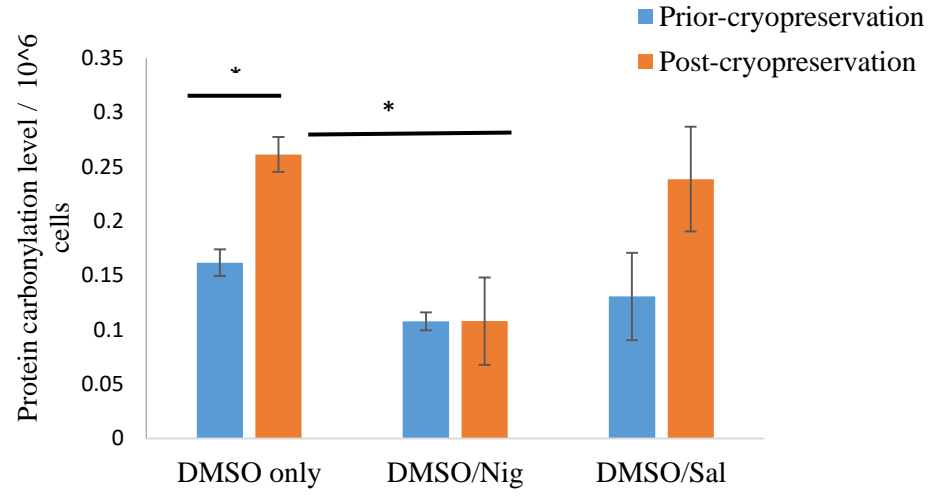

16  
17  
18  
19  
20  
21  
22  
23  
24  
25  
26  
27  
28  
29  
30  
31  
32  
33  
34  
35  
36  
37  
38  
39  
40  
41  
42  
43  
44  
45  
46  
47  
48  
49  
50  
51  
52  
53  
54  
55  
56  
57  
58  
59  
60  
61  
62  
63  
64  
65

**Supplement S4**

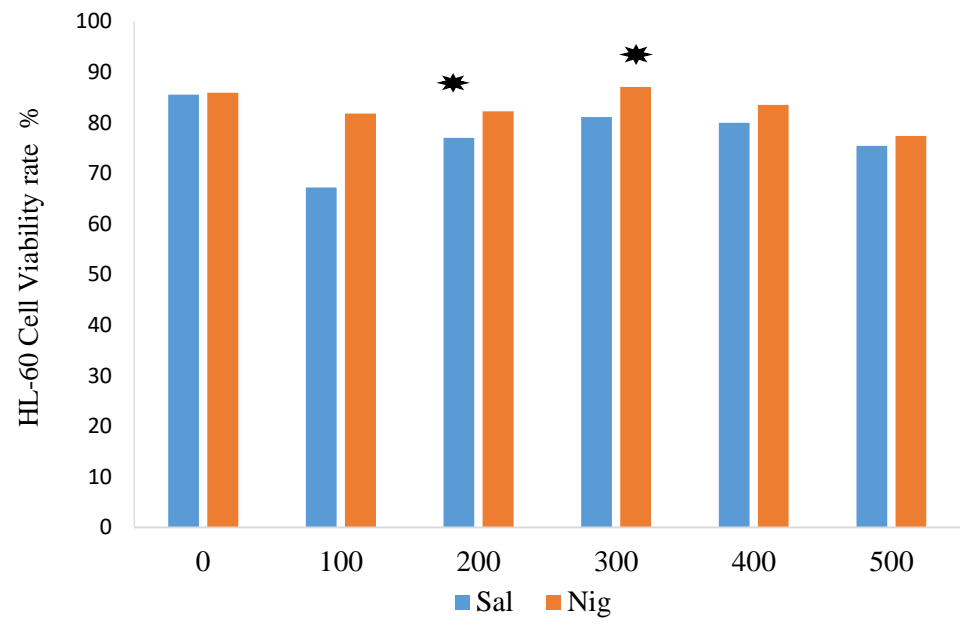

Supplement: giy154_giga-d-18-00064_revision_3.pdf [file giy154_giga-d-18-00064_revision_3.pdf]
