# Supplementary material for: BLINK: a package for the next level of genome-wide association studies with both individuals and markers in the millions
Source: PubMed Central journal article supplement (PMC6365300; doi:10.1093/gigascience/giy154), 2018-12-11
Supplement: giy154_response_to_reviewer_comments_revision_1.pdf [file giy154_response_to_reviewer_comments_revision_1.pdf]

## Author's Response To Reviewer Comments

Close

Dear Editor,

Please find attached the revised version of our manuscript, Ref "GIGA-D-18-00064R1, entitled: "Human Leukaemia cells (HL-60) proteomic and biological signatures underpinning cryo-damage are differentially modulated by novel cryo-additives". The referees and board member comments were addressed in the latest version Ref. "GIGA-D-18-00064R1.

On the behalf of the authors I would like to thank you, boards members and the reviewers for your collaboration.

Looking forward to hearing from you.

Kind regards

Dr, H.Rahmoune

Close
